# Supplementary material
Source: PubMed Central journal article supplement (PMC6440811)
Supplement: NIHMS1512660-supplement-2.pdf [file NIHMS1512660-supplement-2.pdf]

Table S1 Genesets enriched in *ANGPTL4* high tertile

| GENESET NAME                                                           | NES        | FDR q-val   |
|------------------------------------------------------------------------|------------|-------------|
| SEMENZA_HIF1_TARGETS                                                   | -2.0450096 | 0.11121274  |
| XU_HGF_SIGNALING_NOT_VIA_AKT1_6HR                                      | -2.0345323 | 0.06629402  |
| PID_HIF1_TFPATHWAY                                                     | -1.9867777 | 0.09369995  |
| NAKAMURA_ADIPOGENESIS_EARLY_UP                                         | -1.9488914 | 0.11575673  |
| MENSE_HYPOXIA_UP                                                       | -1.9474787 | 0.09416903  |
| WANG_ADIPOGENIC_GENES_REPRESSED_BY_SIRT1                               | -1.9432915 | 0.0863786   |
| ELVIDGE_HYPOXIA_UP                                                     | -1.9213438 | 0.10970314  |
| HARRIS_HYPOXIA                                                         | -1.9207014 | 0.09689076  |
| ELVIDGE_HYPOXIA_BY_DMOG_UP                                             | -1.9132416 | 0.095227554 |
| ELVIDGE_HIF1A_TARGETS_DN                                               | -1.9029248 | 0.09945167  |
| GROSS_HIF1A_TARGETS_DN                                                 | -1.901846  | 0.09312335  |
| MANALO_HYPOXIA_UP                                                      | -1.8883388 | 0.09935503  |
| ELVIDGE_HIF1A_AND_HIF2A_TARGETS_DN                                     | -1.8786302 | 0.102076106 |
| ST_DIFFERENTIATION_PATHWAY_IN_PC12_CELLS                               | -1.870037  | 0.10649821  |
| BURTON_ADIPOGENESIS_6                                                  | -1.8670576 | 0.10363435  |
| REACTOME_GASTRIN_CREB_SIGNALING_PATHWAY_VIA_PKC_AND_MAPK               | -1.8641434 | 0.10148596  |
| MCBRYAN_PUBERTAL_BREAST_4_SWK_DN                                       | -1.8637574 | 0.09668005  |
| LEE_LIVER_CANCER                                                       | -1.863276  | 0.09180808  |
| WINTER_HYPOXIA_METAGENE                                                | -1.8607104 | 0.09067595  |
| FARDIN_HYPOXIA_11                                                      | -1.8592207 | 0.087266594 |
| QI_HYPOXIA                                                             | -1.8522855 | 0.09218094  |
| SARTIPY_NORMAL_AT_INSULIN_RESISTANCE_UP                                | -1.8495221 | 0.09044228  |
| BERENJENO_ROCK_SIGNALING_NOT_VIA_RHOA_UP                               | -1.8488771 | 0.08716043  |
| LEE_CALORIE_RESTRICTION_MUSCLE_UP                                      | -1.8484713 | 0.08388133  |
| BIOCARTA_CXCR4_PATHWAY                                                 | -1.8484579 | 0.08062777  |
| REN_ALVEOLAR_RHABDOMYOSARCOMA_DN                                       | -1.8481016 | 0.07796351  |
| REACTOME_DIABETES_PATHWAYS                                             | -1.8441297 | 0.077969104 |
| CHEN_LVAD_SUPPORT_OF_FAILING_HEART_UP                                  | -1.842137  | 0.07743071  |
| NOJIMA_SFRP2_TARGETS_UP                                                | -1.8410693 | 0.07594289  |
| JIANG_HYPOXIA_NORMAL                                                   | -1.8303577 | 0.0859045   |
| WANG_CISPLATIN_RESPONSE_AND_XPC_DN                                     | -1.8286785 | 0.08482678  |
| KIM_HYPOXIA                                                            | -1.8273299 | 0.08333814  |
| PID_ANGIOPHOTIN_RECEPTOR_PATHWAY                                       | -1.8267733 | 0.0812883   |
| REACTOME_TRANSCRIPTIONAL_REGULATION_OF_WHITE_ADIPOCYTE_DIFFERENTIATION | -1.8253716 | 0.08049935  |
| IIZUKA_LIVER_CANCER_PROGRESSION_L1_G1_UP                               | -1.8164879 | 0.08800152  |
| PID_HIF2PATHWAY                                                        | -1.8153806 | 0.086891025 |
| CAVARD_LIVER_CANCER_MALIGNANT_VS_BENIGN                                | -1.8153211 | 0.08456917  |
| AMIT_DELAYED_EARLY_GENES                                               | -1.814061  | 0.08332087  |
| PID_S1P_S1P1_PATHWAY                                                   | -1.8118207 | 0.08359198  |
| REACTOME_G_ALPHA_Q_SIGNALING_EVENTS                                    | -1.8080823 | 0.08568619  |
| ACEVEDO_LIVER_TUMOR_VS_NORMAL_ADJACENT_TISSUE_DN                       | -1.8062084 | 0.08567859  |
| REACTOME_PLATELET_HOMEOSTASIS                                          | -1.8054377 | 0.08447173  |
| REACTOME_PPARA_ACTIVATES_GENE_EXPRESSION                               | -1.8043208 | 0.08371156  |
| GROSS_HYPOXIA_VIA_ELK3_AND_HIF1A_UP                                    | -1.8037033 | 0.08243169  |
| RODRIGUES_NTN1_AND_DCC_TARGETS                                         | -1.8023353 | 0.0816663   |
| ST_GRANULE_CELL_SURVIVAL_PATHWAY                                       | -1.8015918 | 0.08045406  |
| MOOTHA_GLYCOGEN_METABOLISM                                             | -1.8008873 | 0.079627484 |
| LEE_LIVER_CANCER_MYC_DN                                                | -1.7931383 | 0.08699689  |
| KIM_WT1_TARGETS_8HR_UP                                                 | -1.7914602 | 0.08727727  |
| REACTOME_FATTY_ACID_TRIACYLGLYCEROL_AND_KETONE_BODY_METABOLISM         | -1.7912964 | 0.08568973  |
| LIM_MAMMARY_STEM_CELL_UP                                               | -1.7892057 | 0.08607356  |
| NAGASHIMA_EGF_SIGNALING_UP                                             | -1.7868503 | 0.087071545 |
| REACTOME_LIPID_DIGESTION_MOBILIZATION_AND_TRANSPORT                    | -1.7861055 | 0.08602366  |
| DAUER_STAT3_TARGETS_UP                                                 | -1.785775  | 0.08469457  |
| KYNG_DNA_DAMAGE_BY_4NQO                                                | -1.785527  | 0.08338214  |
| BIOCARTA_CARDIACEGF_PATHWAY                                            | -1.7817354 | 0.08583483  |
| DALESSIO_TSA_RESPONSE                                                  | -1.7809496 | 0.0853809   |
| JOSEPH_RESPONSE_TO_SODIUM_BUTYRATE_DN                                  | -1.7783064 | 0.08693019  |
| KEGG_GLYCOLYSIS_GLUconeogenesis                                        | -1.7761195 | 0.08763943  |
| PID_LYSOPHOSPHOLIPID_PATHWAY                                           | -1.7751267 | 0.08748693  |
| PODAR_RESPONSE_TO_ADAPHOSTIN_UP                                        | -1.7750502 | 0.08612633  |
| CHIARADONNA_NEOPLASTIC_TRANSFORMATION_CDC25_DN                         | -1.774516  | 0.085312515 |
| ZWANG_CLASS_2_TRANSIENTLY_INDUCED_BY_EGF                               | -1.7743043 | 0.08407586  |
| HSIAO_LIVER_SPECIFIC_GENES                                             | -1.7739222 | 0.083153985 |
| YAO_TEMPORAL_RESPONSE_TO_PROGESTERONE_CLUSTER_1                        | -1.7730553 | 0.08277284  |
| ZHU_CMV_8_HR_DN                                                        | -1.7711675 | 0.08314884  |
| MIYAGAWA_TARGETS_OF_EWSR1_ETS_FUSIONS_DN                               | -1.7703114 | 0.08261521  |
| BIOCARTA_SPRY_PATHWAY                                                  | -1.7701255 | 0.08162646  |
| BURTON_ADIPOGENESIS_9                                                  | -1.7701119 | 0.080443464 |
| CHIARADONNA_NEOPLASTIC_TRANSFORMATION_KRAS_DN                          | -1.7680278 | 0.081185326 |
| KAYO_CALORIE_RESTRICTION_MUSCLE_UP                                     | -1.7670985 | 0.08063165  |
| MARTORIATI_MDM4_TARGETS_FETAL_LIVER_UP                                 | -1.7661153 | 0.080297776 |
| PLASARI_TGFB1_TARGETS_10HR_UP                                          | -1.7643726 | 0.08104978  |
| BONOME_OVARIAN_CANCER_SURVIVAL_SUBOPTIMAL_DEBULKING                    | -1.7640305 | 0.08023032  |
| REACTOME_RESPONSE_TO_ELEVATED_PLATELET_CYTOSOLIC_CA2                   | -1.7637875 | 0.07933941  |
| BILANGES_SERUM_SENSITIVE_VIA_TSC1                                      | -1.7628487 | 0.07905408  |
| REACTOME_CLASS_B_2_SECRETIN_FAMILY_RECEPTORS                           | -1.7628381 | 0.0780274   |
| DELACROIX_RARG_BOUND_MEF                                               | -1.762328  | 0.077552244 |

|                                                                                |            |             |
|--------------------------------------------------------------------------------|------------|-------------|
| ZHU_SKIL_TARGETS_UP                                                            | -1.761117  | 0.07774725  |
| BIOCARTA_NO1_PATHWAY                                                           | -1.7584411 | 0.07931442  |
| CAIRO_HEPATOBLASTOMA_DN                                                        | -1.757039  | 0.08018187  |
| MATZUK_CENTRAL_FOR_FEMALE_FERTILITY                                            | -1.7559531 | 0.08028123  |
| NAKAMURA_ADIPOGENESIS_LATE_UP                                                  | -1.7524201 | 0.08255363  |
| KEGG_PPAR_SIGNALING_PATHWAY                                                    | -1.7477175 | 0.08643225  |
| REACTOME_MAPK_TARGETS_NUCLEAR_EVENTS_MEDIATED_BY_MAP_KINASES                   | -1.7461811 | 0.08699519  |
| PID_TCR_CALCIIUM_PATHWAY                                                       | -1.7460083 | 0.08608949  |
| REACTOME_G_ALPHA_S_SIGNALING_EVENTS                                            | -1.7458001 | 0.085294195 |
| RUAN_RESPONSE_TO_TNF_DN                                                        | -1.7449893 | 0.08525091  |
| SUH_COEXPRESSED_WITH_ID1_AND_ID2_UP                                            | -1.7449178 | 0.0843329   |
| MIKKELSEN_ES_HCP_WITH_H3K27ME3                                                 | -1.7447964 | 0.08347957  |
| LANDIS_ERBB2_BREAST_TUMORS_324_DN                                              | -1.7443069 | 0.08302545  |
| SCHRAETS_MLL_TARGETS_DN                                                        | -1.7424741 | 0.084001265 |
| KEGG_ADIPOCYTOKINE_SIGNALING_PATHWAY                                           | -1.7424504 | 0.08311097  |
| LEE_LIVER_CANCER_ACOX1_DN                                                      | -1.7417908 | 0.08301324  |
| CHARAFE_BREAST_CANCER_LUMINAL_VS_MESENCHYMAL_DN                                | -1.7416569 | 0.082263134 |
| YAO_TEMPORAL_RESPONSE_TO_PROGESTERONE_CLUSTER_8                                | -1.7414589 | 0.081599124 |
| TSENG_IRS1_TARGETS_DN                                                          | -1.741194  | 0.08094261  |
| PID_UPA_UPAR_PATHWAY                                                           | -1.7388288 | 0.08268227  |
| GERY_CEBP_TARGETS                                                              | -1.7387767 | 0.08185596  |
| BURTON_ADIPOGENESIS_PEAK_AT_2HR                                                | -1.7386979 | 0.08108577  |
| MOREAUX_B_LYMPHOCYTE_MATURATION_BY_TACI_UP                                     | -1.7377883 | 0.081058756 |
| ZHANG_TLX_TARGETS_UP                                                           | -1.7371148 | 0.08082214  |
| PID_VEGFR1_PATHWAY                                                             | -1.7365661 | 0.080866955 |
| BIOCARTA_CCR5_PATHWAY                                                          | -1.7341496 | 0.082320176 |
| JJ_RESPONSE_TO_FSH_DN                                                          | -1.7332202 | 0.08251381  |
| KEGG_ARACHIDONIC_ACID_METABOLISM                                               | -1.7331053 | 0.08183019  |
| CROONQUIST_STROMAL_STIMULATION_UP                                              | -1.7328515 | 0.08135056  |
| NAGASHIMA_NRG1_SIGNALING_UP                                                    | -1.7324766 | 0.08086114  |
| KEGG_LINOLEIC_ACID_METABOLISM                                                  | -1.7321635 | 0.08036778  |
| CHUANG_OXIDATIVE_STRESS_RESPONSE_UP                                            | -1.7313236 | 0.080195464 |
| REACTOME_SIGNAL_AMPLIFICATION                                                  | -1.729997  | 0.08057933  |
| REACTOME_NFKB_AND_MAP_KINASES_ACTIVATION_MEDIATED_BY_TLR4_SIGNALING_REPERTOIRE | -1.7289455 | 0.080776446 |
| KIM_GERMINAL_CENTER_T_HELPER_DN                                                | -1.7286214 | 0.08026877  |
| VART_KSHV_INFECTION_ANGIOGENIC_MARKERS_DN                                      | -1.7284108 | 0.079680786 |
| WANG_NEOPLASTIC_TRANSFORMATION_BY_CCND1_MYC                                    | -1.7278935 | 0.079491735 |
| INGRAM_SHH_TARGETS_UP                                                          | -1.7274393 | 0.079223305 |
| GARGALOVIC_RESPONSE_TO_OXIDIZED_PHOSPHOLIPIDS_TURQUOISE_UP                     | -1.7265228 | 0.07938698  |
| CONCANNON_APOPTOSIS_BY_EPOXOMICIN_UP                                           | -1.7249221 | 0.080173135 |
| ZHU_CMV_ALL_DN                                                                 | -1.7243787 | 0.08008028  |
| WAMUNYOKOLI_OVARIAN_CANCER_GRADES_1_2_DN                                       | -1.7243404 | 0.07943788  |
| GENTILE_UV_LOW_DOSE_DN                                                         | -1.7218722 | 0.081113525 |
| ZHOU_INFLAMMATORY_RESPONSE_FIMA_UP                                             | -1.7213427 | 0.08085202  |
| CHIANG_LIVER_CANCER_SUBCLASS_PROLIFERATION_DN                                  | -1.720344  | 0.08129265  |
| REACTOME_LIPOPROTEIN_METABOLISM                                                | -1.7196453 | 0.081281565 |
| PID_ALK1_PATHWAY                                                               | -1.7195086 | 0.08071641  |
| REACTOME_MAP_KINASE_ACTIVATION_IN_TLR_CASCADE                                  | -1.7191654 | 0.080453135 |
| PLASARI_TGFB1_TARGETS_1HR_UP                                                   | -1.7191296 | 0.0798289   |
| HUNSBERGER_EXERCISE_REGULATED_GENES                                            | -1.7191281 | 0.07920524  |
| KEGG_GAP_JUNCTION                                                              | -1.7182395 | 0.079466954 |
| BROWNE_HCMV_INFECTION_48HR_DN                                                  | -1.7179921 | 0.07909148  |
| BROWNE_HCMV_INFECTION_16HR_DN                                                  | -1.7171308 | 0.07920914  |
| KEGG_TYROSINE_METABOLISM                                                       | -1.7160461 | 0.07958317  |
| GARGALOVIC_RESPONSE_TO_OXIDIZED_PHOSPHOLIPIDS_MAGENTA_UP                       | -1.7142761 | 0.0808603   |
| KEGG_HYPERTROPHIC_CARDIOMYOPATHY_HCM                                           | -1.7137382 | 0.08083359  |
| MCBRYAN_PUBERTAL_TGFB1_TARGETS_UP                                              | -1.7136239 | 0.08032334  |
| LEE_LIVER_CANCER_DENA_DN                                                       | -1.7135082 | 0.079900354 |
| CHARAFE_BREAST_CANCER_BASAL_VS_MESENCHYMAL_DN                                  | -1.7133142 | 0.07951825  |
| MELLMAN_TUT1_TARGETS_DN                                                        | -1.7132549 | 0.07903326  |
| BURTON_ADIPOGENESIS_1                                                          | -1.713092  | 0.07868164  |
| REACTOME_INTEGRATION_OF_ENERGY_METABOLISM                                      | -1.7123165 | 0.07894765  |
| AMIT_EGF_RESPONSE_240_HELA                                                     | -1.7122365 | 0.07842883  |
| ZAMORA_NOS2_TARGETS_DN                                                         | -1.7121278 | 0.07791808  |
| HILLION_HMGA1B_TARGETS                                                         | -1.7118547 | 0.07763502  |
| TIAN_TNF_SIGNALING_NOT_VIA_NFKB                                                | -1.7101299 | 0.07861696  |
| ROSS_AML_OF_FAB_M7_TYPE                                                        | -1.7091811 | 0.07886806  |
| REACTOME_DEVELOPMENTAL_BIOLOGY                                                 | -1.708846  | 0.07873625  |
| REACTOME_NITRIC_OXIDE_STIMULATES_GUANYLATE_CYCLASE                             | -1.7076201 | 0.079391874 |
| BIOCARTA_PPARA_PATHWAY                                                         | -1.7043626 | 0.081844285 |
| PID_ENDOTHELIN_PATHWAY                                                         | -1.7037723 | 0.08194467  |
| SATO_SILENCED_BY_DEACETYLATION_IN_PANCREATIC_CANCER                            | -1.703491  | 0.0816543   |
| WANG_MLL_TARGETS                                                               | -1.7034677 | 0.08113787  |
| URS_ADIPOCYTE_DIFFERENTIATION_UP                                               | -1.7029867 | 0.08097729  |
| MAHADEVAN_RESPONSE_TO_MP470_DN                                                 | -1.7026869 | 0.08075766  |
| PEDERSEN_TARGETS_OF_611CTF_ISOFORM_OF_ERBB2                                    | -1.7016563 | 0.08110622  |
| LEONARD_HYPOXIA                                                                | -1.7007887 | 0.081535675 |
| ZWANG_CLASS_3_TRANSIENTLY_INDUCED_BY_EGF                                       | -1.7003471 | 0.08146841  |
| AMIT_EGF_RESPONSE_120_HELA                                                     | -1.6993773 | 0.081846036 |
| HAHTOLA_MYCOSIS_FUNGOIDES_CD4_UP                                               | -1.6992028 | 0.081428126 |

|                                                         |            |             |
|---------------------------------------------------------|------------|-------------|
| KEGG_PRIMARY_BILE_ACID_BIOSYNTHESIS                     | -1.698161  | 0.081724845 |
| TAKEDA_TARGETS_OF_NUP98_HOXA9_FUSION_6HR_DN             | -1.6972544 | 0.082060814 |
| RUAN_RESPONSE_TO_TNF_TROGLITAZONE_DN                    | -1.697071  | 0.08165764  |
| KYNG_ENVIRONMENTAL_STRESS_RESPONSE_UP                   | -1.6963189 | 0.081842355 |
| ZHANG_TLX_TARGETS_36HR_UP                               | -1.6958085 | 0.08175331  |
| SU_LIVER                                                | -1.6956621 | 0.081386454 |
| ZHOU_INFLAMMATORY_RESPONSE_LIVE_UP                      | -1.6951724 | 0.08137293  |
| REACTOME_GLYCOGEN_BREAKDOWN_GLYCOGENOLYSIS              | -1.6934499 | 0.08251963  |
| YAMAZAKI_TCEB3_TARGETS_UP                               | -1.6930832 | 0.082344875 |
| NING_CHRONIC_OBSTRUCTIVE_PULMONARY_DISEASE_DN           | -1.6918256 | 0.08313634  |
| GUO_HEX_TARGETS_DN                                      | -1.6916736 | 0.082752444 |
| VART_KSHV_INFECTION_ANGIOGENIC_MARKERS_UP               | -1.690996  | 0.082917385 |
| SARTIPY_BLUNTED_BY_INSULIN_RESISTANCE_UP                | -1.6899346 | 0.08352828  |
| COLIN_PILOCYTIC_ASTROCYTOMA_VS_GLIOMASTOMA_DN           | -1.6894724 | 0.08348366  |
| ACEVEDO_LIVER_CANCER_DN                                 | -1.6890762 | 0.08330926  |
| REACTOME_G_PROTEIN_ACTIVATION                           | -1.6887435 | 0.083113156 |
| NAKAMURA_METASTASIS_MODEL_UP                            | -1.6878341 | 0.08350123  |
| YORDY_RECIPROCAL_REGULATION_BY_ETS1_AND_SP100_DN        | -1.6868362 | 0.08401778  |
| BROWNE_HCMV_INFECTION_24HR_DN                           | -1.6868148 | 0.0835631   |
| WANG_METHYLATED_IN_BREAST_CANCER                        | -1.6861521 | 0.083790675 |
| NABA_SECRETED_FACTORS                                   | -1.6857271 | 0.083644174 |
| NABA_ECM_AFFILIATED                                     | -1.6855277 | 0.08330239  |
| ADDYA_ERYTHROID_DIFFERENTIATION_BY_HEMIN                | -1.6847514 | 0.08361836  |
| MIDORIKAWA_AMPLIFIED_IN_LIVER_CANCER                    | -1.684554  | 0.083357655 |
| PRAMOONJAGO_SOX4_TARGETS_UP                             | -1.6832545 | 0.08394222  |
| MCCLUNG_CREB1_TARGETS_UP                                | -1.6829907 | 0.08383167  |
| LEE_METASTASIS_AND_ALTERNATIVE_SPLICING_UP              | -1.6820606 | 0.08439232  |
| GROSS_HYPOXIA_VIA_ELK3_ONLY_UP                          | -1.6815801 | 0.08438963  |
| BURTON_ADIPOGENESIS_2                                   | -1.6804322 | 0.08511699  |
| SUZUKI_RESPONSE_TO_TSA_AND_DECITABINE_1A                | -1.6802982 | 0.08484975  |
| MARTORIATI_MDM4_TARGETS_NEUROEPITHELIUM_UP              | -1.6796871 | 0.084955506 |
| HOSHIDA_LIVER_CANCER_SUBCLASS_S3                        | -1.6791917 | 0.08497912  |
| THEODOROU_MAMMARY_TUMORIGENESIS                         | -1.6789801 | 0.08475536  |
| SWEET_KRAS_TARGETS_UP                                   | -1.6783912 | 0.08487618  |
| SCHAEFFER_PROSTATE_DEVELOPMENT_12HR_UP                  | -1.6773192 | 0.08536699  |
| GYORFFY_DOXORUBICIN_RESISTANCE                          | -1.6772717 | 0.08498674  |
| HENDRICKS_SMARCA4_TARGETS_UP                            | -1.6772292 | 0.084609434 |
| PID_PDGFRA_PATHWAY                                      | -1.6771785 | 0.08424049  |
| ROZANOV_MMP14_TARGETS_SUBSET                            | -1.6770898 | 0.083919    |
| SWEET_LUNG_CANCER_KRAS_DN                               | -1.6766896 | 0.08392431  |
| REACTOME_GLUCOSE_METABOLISM                             | -1.6765519 | 0.08370357  |
| SASAI_RESISTANCE_TO_NEOPLASTIC_TRANSFORMATION           | -1.6754506 | 0.08423706  |
| KOKKINAKIS_METHIONINE_DEPRIVATION_96HR_UP               | -1.6751407 | 0.08408665  |
| SCHLESINGER_METHYLATED_DE_NOVO_IN_CANCER                | -1.6748817 | 0.08391083  |
| WAKABAYASHI_ADIPOGENESIS_PPARG_RXRA_BOUND_36HR          | -1.6745853 | 0.08382748  |
| QI_PLASMACYTOMA_DN                                      | -1.6741543 | 0.0837507   |
| REACTOME_ADP_SIGNALLING_THROUGH_P2RY12                  | -1.6741459 | 0.083351485 |
| SCHAEFFER_PROSTATE_DEVELOPMENT_6HR_UP                   | -1.6737344 | 0.08330849  |
| MCBRYAN_PUBERTAL_BREAST_3_4WK_DN                        | -1.6733705 | 0.083269894 |
| CEBALLOS_TARGETS_OF_TP53_AND_MYC_UP                     | -1.6727643 | 0.08341417  |
| LEIN_MEDULLA_MARKERS                                    | -1.6726391 | 0.08311937  |
| ZHU_CMV_24_HR_DN                                        | -1.6722862 | 0.08302748  |
| PASINI_SUZ12_TARGETS_DN                                 | -1.6717955 | 0.083024025 |
| AMIT_EGF_RESPONSE_60_MCF10A                             | -1.6706293 | 0.0837133   |
| KEGG_FOCAL_ADHESION                                     | -1.6705326 | 0.08341602  |
| KAN_RESPONSE_TO_ARSENIC_TRIOXIDE                        | -1.6703179 | 0.083191834 |
| GROSS_HYPOXIA_VIA_HIF1A_DN                              | -1.6699485 | 0.083136484 |
| PID_IL6_7_PATHWAY                                       | -1.6695285 | 0.08314592  |
| KAAB_HEART_ATRIUM_VS_VENTRICLE_DN                       | -1.6688077 | 0.08345343  |
| PILON_KLF1_TARGETS_UP                                   | -1.6685631 | 0.08323856  |
| JECHLINGER_EPITHELIAL_TO_MESENCHYMAL_TRANSITION_UP      | -1.6676681 | 0.083705895 |
| LEE_AGING_MUSCLE_UP                                     | -1.6674881 | 0.08353392  |
| JIANG_TIP30_TARGETS_UP                                  | -1.6673903 | 0.083232895 |
| KONDO_EZH2_TARGETS                                      | -1.6661009 | 0.084105335 |
| GROSS_HYPOXIA_VIA_ELK3_DN                               | -1.6659665 | 0.08383363  |
| DAVICIONI_TARGETS_OF_PAX_FOXO1_FUSIONS_UP               | -1.6656374 | 0.08378893  |
| HOEGERKORP_CD44_TARGETS_DIRECT_UP                       | -1.6653175 | 0.083661325 |
| REACTOME_REGULATION_OF_INSULIN_SECRETION                | -1.6650312 | 0.08349379  |
| HOEBEKE_LYMPHOID_STEM_CELL_DN                           | -1.6649668 | 0.08318729  |
| PETROVA_ENDOTHELIUM_LYMPHATIC_VS_BLOOD_DN               | -1.6641085 | 0.083615564 |
| LEE_AGING_NEOCORTEX_UP                                  | -1.6638585 | 0.083489425 |
| LEE_LIVER_CANCER_MYC_TGFA_DN                            | -1.6637082 | 0.08326189  |
| PID_CONE_PATHWAY                                        | -1.6627222 | 0.0837099   |
| KEGG_TRYPTOPHAN_METABOLISM                              | -1.6625067 | 0.08349779  |
| KERLEY_RESPONSE_TO_CISPLATIN_UP                         | -1.6623722 | 0.08325778  |
| BROWNE_HCMV_INFECTION_30MIN_UP                          | -1.6621948 | 0.08306532  |
| OSWALD_HEMATOPOIETIC_STEM_CELL_IN_COLLAGEN_GEL_UP       | -1.6617601 | 0.08297421  |
| MAHAJAN_RESPONSE_TO_IL1A_DN                             | -1.6614654 | 0.08299423  |
| REACTOME_MYD88_MAL_CASCADE_INITIATED_ON_PLASMA_MEMBRANE | -1.661348  | 0.08278112  |
| CADWELL_ATG16L1_TARGETS_UP                              | -1.6607431 | 0.08296382  |

|                                                                                   |            |             |
|-----------------------------------------------------------------------------------|------------|-------------|
| LEE_LIVER_CANCER_CIPROFIBRATE_DN                                                  | -1.6606516 | 0.082674436 |
| WEST_ADRENOCORTICAL_TUMOR_DN                                                      | -1.6603812 | 0.08255568  |
| BEGUM_TARGETS_OF_PAX3_FOXP1_FUSION_DN                                             | -1.6599796 | 0.082531445 |
| MCDOWELL_ACUTE_LUNG_INJURY_UP                                                     | -1.6595477 | 0.08261236  |
| BIOCARTA_CDMAC_PATHWAY                                                            | -1.6593852 | 0.082406536 |
| REACTOME_OXYGEN_DEPENDENT_PROLINE_HYDROXYLATION_OF_HYPOXIA_INDUCIBLE_FACTOR_ALPHA | -1.6592628 | 0.08216639  |
| PID_FGF_PATHWAY                                                                   | -1.6587102 | 0.08230032  |
| IGLESIAS_E2F_TARGETS_UP                                                           | -1.6580935 | 0.08261168  |
| BIOCARTA_ETS_PATHWAY                                                              | -1.6574589 | 0.08278115  |
| LANDIS_ERBB2_BREAST_PNEOPLASTIC_DN                                                | -1.6569575 | 0.08289074  |
| MCCABE_HOXC6_TARGETS_DN                                                           | -1.6561393 | 0.08337063  |
| LEE_LIVER_CANCER_E2F1_DN                                                          | -1.6557719 | 0.08331513  |
| REACTOME_FORMATION_OF_FIBRIN_CLOT_CLOTTING_CASCADE                                | -1.6552151 | 0.08352342  |
| GROSS_ELK3_TARGETS_DN                                                             | -1.6550955 | 0.083309315 |
| MIKKELSEN_IPS_HCP_WITH_H3_UNMETHYLATED                                            | -1.6546737 | 0.083377704 |
| PID_HNF3B_PATHWAY                                                                 | -1.6544396 | 0.08324443  |
| GAUSSMANN_MLL_AF4_FUSION_TARGETS_E_UP                                             | -1.6540446 | 0.0832863   |
| BIOCARTA_AT1R_PATHWAY                                                             | -1.6539875 | 0.08298856  |
| MAGRANGEAS_MULTIPLE_MYELOMA_IGG_VS_IGA_UP                                         | -1.6531643 | 0.083515815 |
| NIELSEN_MALIGNANT_FIBROUS_HISTIOCYTOMA_UP                                         | -1.6527257 | 0.0835489   |
| LA_MEN1_TARGETS                                                                   | -1.6520785 | 0.083866335 |
| COATES_MACROPHAGE_M1_VS_M2_DN                                                     | -1.6513785 | 0.08417261  |
| AMIT_SERUM_RESPONSE_60_MCF10A                                                     | -1.651204  | 0.08405149  |
| VERRECCHIA_EARLY_RESPONSE_TO_TGFB1                                                | -1.650527  | 0.084299974 |
| REACTOME_INTRINSIC_PATHWAY                                                        | -1.6502899 | 0.08420327  |
| IZADPANAH_STEM_CELL_ADIPOSE_VS_BONE_DN                                            | -1.650155  | 0.08399428  |
| BIOCARTA_GPCR_PATHWAY                                                             | -1.6498219 | 0.08390863  |
| KOBAYASHI_RESPONSE_TO_ROMIDEPSIN                                                  | -1.6497601 | 0.08364399  |
| KEGG_MAPK_SIGNALING_PATHWAY                                                       | -1.6496814 | 0.08338659  |
| IWANAGA_CARCINOGENESIS_BY_KRAS_PTEN_DN                                            | -1.6489831 | 0.08369736  |
| CHIBA_RESPONSE_TO_TSA_UP                                                          | -1.6489635 | 0.08340598  |
| SHIPP_DLCL_CURED_VS_FATAL_UP                                                      | -1.6480428 | 0.08384531  |
| LANDIS_ERBB2_BREAST_TUMORS_65_DN                                                  | -1.6480427 | 0.08353592  |
| REACTOME_METABOLISM_OF_LIPIDS_AND_LIPOPROTEINS                                    | -1.6472899 | 0.08381072  |
| AMIT_SERUM_RESPONSE_40_MCF10A                                                     | -1.6461517 | 0.08445954  |
| REACTOME_TRIF_MEDIATED_TLR3_SIGNALING                                             | -1.6458457 | 0.08446427  |
| HALMOS_CEBPA_TARGETS_UP                                                           | -1.6448766 | 0.085008934 |
| WAKABAYASHI_ADIPOGENESIS_PPARG_RXRA_BOUND_WITH_H4K20ME1_MARK                      | -1.6445389 | 0.08501273  |
| BASSO_HAIRY_CELL_LEUKEMIA_DN                                                      | -1.6442121 | 0.08502609  |
| LINDVALL_IMMORTALIZED_BY_TERT_DN                                                  | -1.644108  | 0.08481929  |
| DORSAM_HOXA9_TARGETS_DN                                                           | -1.6437445 | 0.084818095 |
| PHONG_TNF_TARGETS_UP                                                              | -1.6423835 | 0.08565702  |
| PID_AP1_PATHWAY                                                                   | -1.6421618 | 0.08562817  |
| ONDER_CDH1_TARGETS_2_UP                                                           | -1.6415004 | 0.085981965 |
| SUNG_METASTASIS_STROMA_UP                                                         | -1.6413031 | 0.085898116 |
| KEGG_FATTY_ACID_METABOLISM                                                        | -1.6412398 | 0.08565289  |
| AMIT_EGF_RESPONSE_40_MCF10A                                                       | -1.6409061 | 0.08564894  |
| BOQUEST_STEM_CELL_CULTURED_VS_FRESH_UP                                            | -1.6407394 | 0.08550186  |
| EBAUER_MYOGENIC_TARGETS_OF_PAX3_FOXP1_FUSION                                      | -1.6401625 | 0.08578395  |
| WOOD_EBV_EBNA1_TARGETS_DN                                                         | -1.6400087 | 0.08561787  |
| NAKAJIMA_MAST_CELL                                                                | -1.6398357 | 0.08551665  |
| TANG_SENESCENCE_TP53_TARGETS_UP                                                   | -1.6398256 | 0.08523268  |
| AMIT_SERUM_RESPONSE_120_MCF10A                                                    | -1.639806  | 0.08495427  |
| LU_AGING_BRAIN_UP                                                                 | -1.6397022 | 0.08474199  |
| RICKMAN_TUMOR_DIFFERENTIATED_WELL_VS_POORLY_DN                                    | -1.639443  | 0.08469722  |
| SENESE_HDAC2_TARGETS_DN                                                           | -1.6390977 | 0.08473487  |
| GRUETZMANN_PANCREATIC_CANCER_DN                                                   | -1.6388657 | 0.084618926 |
| GOLUB_ALL_VS_AML_DN                                                               | -1.6387156 | 0.08443203  |
| LEE_LIVER_CANCER_MYC_E2F1_DN                                                      | -1.6386014 | 0.084212124 |
| VARELA_ZMPSTE24_TARGETS_DN                                                        | -1.6384473 | 0.08404424  |
| ZHENG_GLIOMASTOMA_PLASTICITY_DN                                                   | -1.6382654 | 0.08387784  |
| WIERENGA_STAT5A_TARGETS_UP                                                        | -1.6376661 | 0.08405021  |
| KEEN_RESPONSE_TO_ROSIGLITAZONE_DN                                                 | -1.6370697 | 0.0843189   |
| ZHOU_TNF_SIGNALING_30MIN                                                          | -1.6362218 | 0.08480425  |
| KINSEY_TARGETS_OF_EWSR1_FLII_FUSION_DN                                            | -1.6355331 | 0.08508083  |
| SCHOEN_NFKB_SIGNALING                                                             | -1.6354578 | 0.08483716  |
| YAO_TEMPORAL_RESPONSE_TO_PROGESTERONE_CLUSTER_0                                   | -1.6352799 | 0.084751144 |
| AFFAR_YY1_TARGETS_UP                                                              | -1.634613  | 0.08499326  |
| KEGG_CALCIIUM_SIGNALING_PATHWAY                                                   | -1.634544  | 0.08477961  |
| VALK_AML_CLUSTER_12                                                               | -1.6344362 | 0.08459426  |
| BOYALUT_LIVER_CANCER_SUBCLASS_G123_DN                                             | -1.6342417 | 0.08445401  |
| TONKS_TARGETS_OF_RUNX1_RUNX1T1_FUSION_ERYTHROCYTE_UP                              | -1.634205  | 0.08420477  |
| LE_EGR2_TARGETS_DN                                                                | -1.6340904 | 0.08405227  |
| REACTOME_PHASE1_FUNCTIONALIZATION_OF_COMPOUNDS                                    | -1.6337131 | 0.084115684 |
| AMIT_EGF_RESPONSE_40_HELA                                                         | -1.6330066 | 0.0844188   |
| MAINA_VHL_TARGETS_DN                                                              | -1.6329937 | 0.08414996  |
| WENG_POR_TARGETS_GLOBAL_DN                                                        | -1.6324481 | 0.08426495  |
| LINDGREN_BLADDER_CANCER_HIGH_RECURRENCE                                           | -1.6321353 | 0.084250644 |
| HASLINGER_B CLL WITH_13Q14_DELETION                                               | -1.631857  | 0.08422714  |
| SCHLINGEMANN_SKIN_CARCINOGENESIS_TPA_UP                                           | -1.6317692 | 0.08403908  |

|                                                                                                                      |            |             |
|----------------------------------------------------------------------------------------------------------------------|------------|-------------|
| REACTOME_TRAF6_MEDIATED_INDUCION_OF_NFKB_AND_MAP_KINASES_UPON_TLR7_8_OR_9_ACTIVATION                                 | -1.6310598 | 0.08443942  |
| LIU_CDX2_TARGETS_UP                                                                                                  | -1.6310066 | 0.084221765 |
| REACTOME_ADP_SIGNALING_THROUGH_P2RY1                                                                                 | -1.6304408 | 0.08450239  |
| BROWNE_HCMV_INFECTION_2HR_UP                                                                                         | -1.6302532 | 0.084464945 |
| LIM_MAMMARY_LUMINAL_MATURE_DN                                                                                        | -1.6296064 | 0.084829226 |
| KEGG_ECM_RECEPTOR_INTERACTION                                                                                        | -1.6293908 | 0.08473251  |
| BROWNE_HCMV_INFECTION_18HR_DN                                                                                        | -1.6293615 | 0.08450777  |
| LANDIS_BREAST_CANCER_PROGRESSION_DN                                                                                  | -1.6289952 | 0.0845441   |
| REACTOME_PLATELET_ACTIVATION_SIGNALING_AND_AGGREGATION                                                               | -1.6288718 | 0.084404215 |
| KOHOUTEK_CCNT2_TARGETS                                                                                               | -1.6288408 | 0.08415746  |
| MOOTHA_GLUCONEOGENESIS                                                                                               | -1.6288338 | 0.08390694  |
| EHLERS_ANEUPLOIDY_UP                                                                                                 | -1.6288327 | 0.083652675 |
| FALVELLA_SMOKERS_WITH_LUNG_CANCER                                                                                    | -1.6283565 | 0.08381636  |
| LEIN_CHOROID_PLEXUS_MARKERS                                                                                          | -1.6277553 | 0.0841312   |
| RUAN_RESPONSE_TO_TROGLITAZONE_UP                                                                                     | -1.6276625 | 0.0839666   |
| RASHI_RESPONSE_TO_IONIZING_RADIATION_1                                                                               | -1.627555  | 0.083779514 |
| HUANG_DASATINIB_RESISTANCE_UP                                                                                        | -1.6270932 | 0.08393115  |
| WOTTON_RUNX_TARGETS_UP                                                                                               | -1.626806  | 0.08386178  |
| CHEBOTAEV_GR_TARGETS_DN                                                                                              | -1.6260281 | 0.08430096  |
| GRAESSMANN_APOPTOSIS_BY_SERUM_DEPRIVATION_DN                                                                         | -1.6260159 | 0.08405484  |
| REACTOME_SYNTHESIS_OF_PA                                                                                             | -1.6252613 | 0.08436682  |
| PHONG_TNF_RESPONSE_VIA_P38_PARTIAL                                                                                   | -1.6247429 | 0.08458485  |
| VECCHI_GASTRIC_CANCER_ADVANCED_VS_EARLY_UP                                                                           | -1.6242677 | 0.08480259  |
| MCGARVEY_SILENCED_BY_METHYLATION_IN_COLON_CANCER                                                                     | -1.6235188 | 0.08524116  |
| DURAND_STROMA_S_UP                                                                                                   | -1.6230888 | 0.0854094   |
| KANG_IMMORTALIZED_BY_TERT_DN                                                                                         | -1.6219813 | 0.08611702  |
| VARELA_ZMPSTE24_TARGETS_UP                                                                                           | -1.6213452 | 0.08641822  |
| MEINHOLD_OVARIAN_CANCER_LOW_GRADE_UP                                                                                 | -1.6213343 | 0.08617374  |
| MATTHEWS_AP1_TARGETS                                                                                                 | -1.6210434 | 0.08617051  |
| MANTOVANI_VIRAL_GPCR_SIGNALING_UP                                                                                    | -1.6207628 | 0.08616848  |
| CLASPER_LYMPHATIC_VESSELS_DURING_METASTASIS_UP                                                                       | -1.6206076 | 0.08607575  |
| TRAYNOR_RETT_SYNDROM_UP                                                                                              | -1.6199692 | 0.086398855 |
| REACTOME_GLUCAGON_TYPE_LIGAND_RECEPTORS                                                                              | -1.6199267 | 0.08618788  |
| MIKKELSEN_IPS_WITH_HCP_H3K27ME3                                                                                      | -1.6198004 | 0.086049184 |
| GAUSSMANN_MLL_AF4_FUSION_TARGETS_E_DN                                                                                | -1.619764  | 0.0858489   |
| REACTOME_REGULATION_OF_INSULIN_LIKE_GROWTH_FACTOR_IGF_ACTIVITY_BY_INSULIN_LIKE_GROWTH_FACTOR_BINDING_PROTEINS_IGFBPS | -1.6196529 | 0.08569032  |
| PARK_TRETINOIN_RESPONSE_AND_RARA_PLZF_FUSION                                                                         | -1.6184802 | 0.08644359  |
| GRADE_COLON_CANCER_DN                                                                                                | -1.6182655 | 0.08635704  |
| WINZEN_DEGRADED_VIA_KHSRP                                                                                            | -1.6181109 | 0.0862545   |
| LEE_LIVER_CANCER_SURVIVAL_UP                                                                                         | -1.6180636 | 0.08607036  |
| LIU_SMARCA4_TARGETS                                                                                                  | -1.6175436 | 0.08628049  |
| BRUINS_UVC_RESPONSE_VIA_TP53_GROUP_B                                                                                 | -1.6175193 | 0.08606763  |
| ZHANG_TLX_TARGETS_60HR_UP                                                                                            | -1.6173443 | 0.0859763   |
| REACTOME_SIGNALING_BY_BMP                                                                                            | -1.6172059 | 0.08584894  |
| NADLER_OBESITY_DN                                                                                                    | -1.6171525 | 0.08567828  |
| REACTOME_ERK_MAPK_TARGETS                                                                                            | -1.6168227 | 0.0857298   |
| CORRE_MULTIPLE_MYELOMA_UP                                                                                            | -1.6164093 | 0.085874274 |
| NING_CHRONIC_OBSTRUCTIVE_PULMONARY_DISEASE_UP                                                                        | -1.616216  | 0.08582559  |
| HOFMANN_MYELODYSPLASTIC_SYNDROM_LOW_RISK_UP                                                                          | -1.6162007 | 0.08559174  |
| WEINMANN_ADAPTATION_TO_HYPOXIA_UP                                                                                    | -1.6153805 | 0.08609412  |
| PID_GLYPICAN_1PATHWAY                                                                                                | -1.6151807 | 0.086043745 |
| YOSHIMURA_MAPK8_TARGETS_DN                                                                                           | -1.6150812 | 0.08587876  |
| REACTOME_G_BETA_GAMMA_SIGNALING_THROUGH_PLG_BETA                                                                     | -1.614951  | 0.08574743  |
| KEGG_COMPLEMENT_AND_COAGULATION_CASCADES                                                                             | -1.6148537 | 0.085592985 |
| KASLER_HDAC7_TARGETS_1_DN                                                                                            | -1.6145457 | 0.085672915 |
| YAMASHITA_METHYLATED_IN_PROSTATE_CANCER                                                                              | -1.614515  | 0.08546052  |
| HOWLIN_PUBERTAL_MAMMARY_GLAND                                                                                        | -1.614359  | 0.085345514 |
| CHEN_LVAD_SUPPORT_OF_FAILING_HEART_DN                                                                                | -1.6143279 | 0.08514405  |
| TSENG_ADIPOGENIC_POTENTIAL_DN                                                                                        | -1.614177  | 0.08503696  |
| ZUCCHI_METASTASIS_DN                                                                                                 | -1.613937  | 0.08499326  |
| HILLION_HMGA1_TARGETS                                                                                                | -1.6135093 | 0.0851962   |
| CHARAFE_BREAST_CANCER_LUMINAL_VS_BASAL_DN                                                                            | -1.6134901 | 0.08499349  |
| DORSEY_GAB2_TARGETS                                                                                                  | -1.6132967 | 0.084932745 |
| DUNNE_TARGETS_OF_AML1_MTG8_FUSION_DN                                                                                 | -1.6131752 | 0.084827416 |
| BURTON_ADIPOGENESIS_4                                                                                                | -1.6129328 | 0.08476029  |
| AMIT_EGF_RESPONSE_120_MCF10A                                                                                         | -1.6128697 | 0.08461328  |
| BIOCARTA_INTRINSIC_PATHWAY                                                                                           | -1.6128525 | 0.08440666  |
| COWLING_MYCN_TARGETS                                                                                                 | -1.612786  | 0.08423696  |
| REACTOME_ENDOGENOUS_STEROLS                                                                                          | -1.6127834 | 0.08401929  |
| MEISSNER_NPC_HCP_WITH_H3K4ME2                                                                                        | -1.6126559 | 0.083903745 |
| WANG_SMARCE1_TARGETS_UP                                                                                              | -1.6125354 | 0.08378338  |
| DANG_REGULATED_BY_MYC_DN                                                                                             | -1.6125128 | 0.083607554 |
| NABA_ECM_REGULATORS                                                                                                  | -1.6124803 | 0.083428055 |
| LE_SKI_TARGETS_UP                                                                                                    | -1.6121535 | 0.08344543  |
| IKEDA_MIR133_TARGETS_UP                                                                                              | -1.612018  | 0.08331448  |
| PID_S1P_S1P2_PATHWAY                                                                                                 | -1.6118301 | 0.083226316 |
| CAIRO_HEPATOBLASTOMA_CLASSES_DN                                                                                      | -1.6117711 | 0.08307885  |
| MCBRYAN_PUBERTAL_BREAST_6_7WK_UP                                                                                     | -1.6117525 | 0.082883574 |
| LABBE_TGFB1_TARGETS_UP                                                                                               | -1.6114901 | 0.08286257  |
| DAVICIONI_MOLECULAR_ARMS_VS_ERMS_DN                                                                                  | -1.6114236 | 0.082706586 |

|                                                      |            |             |
|------------------------------------------------------|------------|-------------|
| ZHANG_PROLIFERATING_VS_QUIESCENT                     | -1.6093625 | 0.08432884  |
| REACTOME_ACYL_CHAIN_REMODELLING_OF_PC                | -1.6089907 | 0.084475435 |
| LIU_PROSTATE_CANCER_DN                               | -1.6086923 | 0.08447756  |
| MARCHINI TRABECTEDIN_RESISTANCE_DN                   | -1.6084971 | 0.084401205 |
| SIMBULAN_UV_RESPONSE_NORMAL_DN                       | -1.608219  | 0.08446351  |
| HARRIS_BRAIN_CANCER_PROGENITORS                      | -1.6076007 | 0.08478958  |
| REACTOME_GPCR_LIGAND_BINDING                         | -1.606955  | 0.0850103   |
| BURTON_ADIPOGENESIS_7                                | -1.6062096 | 0.08544527  |
| BOQUEST_STEM_CELL_UP                                 | -1.6060672 | 0.085356325 |
| PID_THROMBIN_PAR1_PATHWAY                            | -1.6060222 | 0.085177265 |
| BERTUCCI_MEDULLARY_VS_DUCTAL_BREAST_CANCER_DN        | -1.6052961 | 0.085537605 |
| RUIZ_TNC_TARGETS_UP                                  | -1.6050491 | 0.085491255 |
| SENESE_HDAC1_TARGETS_DN                              | -1.6049458 | 0.08536464  |
| RUAN_RESPONSE_TO_TROGLITAZONE_DN                     | -1.6048473 | 0.08526549  |
| WOTTON_RUNX_TARGETS_DN                               | -1.6044608 | 0.085385025 |
| REACTOME_CGMP_EFFECTS                                | -1.6042494 | 0.08533217  |
| WATANABE_ULCERATIVE_COLITIS_WITH_CANCER_UP           | -1.604219  | 0.08513964  |
| ACEVEDO_FGFR1_TARGETS_IN_PROSTATE_CANCER_MODEL_DN    | -1.6039965 | 0.0851602   |
| DANG_MYC_TARGETS_DN                                  | -1.603996  | 0.08495598  |
| MIKKELSEN_MEF_LCP_WITH_H3K4ME3                       | -1.6035608 | 0.085099325 |
| KIM_WT1_TARGETS_12HR_UP                              | -1.6032554 | 0.0851744   |
| CERVERA_SDHB_TARGETS_1_UP                            | -1.6023918 | 0.08566825  |
| MCBRYAN_PUBERTAL_BREAST_5_GWK_DN                     | -1.6013634 | 0.086306095 |
| DELASERNA_MYOD_TARGETS_DN                            | -1.600928  | 0.08651358  |
| BERENJENO_TRANSFORMED_BY_RHOA_REVERSIBLY_DN          | -1.6008728 | 0.08633854  |
| KEGG_NEUROACTIVE_LIGAND_RECEPTOR_INTERACTION         | -1.6000036 | 0.086854726 |
| BAELDE_DIABETIC_NEPHROPATHY_UP                       | -1.5991951 | 0.08724359  |
| YAO_HOXA10_TARGETS_VIA_PROGESTERONE_UP               | -1.599035  | 0.08720692  |
| HERNANDEZ_ABERRANT_MITOSIS_BY_DOCETACEL_2NM_UP       | -1.5986624 | 0.08724324  |
| KEGG_RENAL_CELL_CARCINOMA                            | -1.5982677 | 0.08734851  |
| AMIT_SERUM_RESPONSE_20_MCF10A                        | -1.597988  | 0.08736738  |
| HAN_JNK_SIGNALING_DN                                 | -1.5978334 | 0.087302856 |
| SAGIV_CD24_TARGETS_DN                                | -1.5974864 | 0.087407105 |
| HOUSTIS_ROS                                          | -1.5974652 | 0.087220296 |
| PEDIROLI_MIR31_TARGETS_DN                            | -1.5972672 | 0.08716737  |
| VANHARANTA_UTERINE_FIBROID_DN                        | -1.5969505 | 0.087272994 |
| GAJATE_RESPONSE_TO TRABECTEDIN_UP                    | -1.5968246 | 0.087196626 |
| HUMMERICH_SKIN_CANCER_PROGRESSION_DN                 | -1.596732  | 0.08705086  |
| GERHOLD_ADIPOGENESIS_UP                              | -1.5967215 | 0.086861275 |
| NABA_CORE_MATRISOME                                  | -1.5964824 | 0.0868885   |
| BALDWIN_PRKCI_TARGETS_UP                             | -1.5963607 | 0.08679235  |
| GENTILE_UV_RESPONSE_CLUSTER_D6                       | -1.5957273 | 0.08717983  |
| HUANG_FOXA2_TARGETS_DN                               | -1.5956968 | 0.08701385  |
| REACTOME_ACTIVATED_TLR4_SIGNALING                    | -1.5956799 | 0.0868213   |
| BAELDE_DIABETIC_NEPHROPATHY_DN                       | -1.5955131 | 0.08678229  |
| WIEDERSCHAIN_TARGETS_OF_BMI1_AND_PCGF2               | -1.5951388 | 0.08693232  |
| SCHAEFFER_PROSTATE_DEVELOPMENT_12HR_DN               | -1.5945144 | 0.08724784  |
| SCHAEFFER_PROSTATE_DEVELOPMENT_48HR_DN               | -1.5943525 | 0.08715363  |
| GAUSSMANN_MLL_AF4_FUSION_TARGETS_F_DN                | -1.5942969 | 0.08700426  |
| KAAB_HEART_ATRIUM_VS_VENTRICLE_UP                    | -1.5940459 | 0.08706674  |
| KYNG_DNA_DAMAGE_DN                                   | -1.5939493 | 0.08693577  |
| WILCOX_RESPONSE_TO_PROGESTERONE_DN                   | -1.5935597 | 0.08705009  |
| LIN_TUMOR_ESCAPE_FROM_IMMUNE_ATTACK                  | -1.5932063 | 0.08718059  |
| KEGG_ARGININE_AND_PROLINE_METABOLISM                 | -1.5927956 | 0.08731621  |
| BIOCARTA_P53HYPOXIA_PATHWAY                          | -1.5927594 | 0.08715328  |
| URS_ADIPOCYTE_DIFFERENTIATION_DN                     | -1.592741  | 0.086978614 |
| LUI_THYROID_CANCER_CLUSTER_2                         | -1.592679  | 0.08683239  |
| LEIN_LOCALIZED_TO_PROXIMAL_DENDRITES                 | -1.5925331 | 0.08678628  |
| VERNOCHET_ADIPOGENESIS                               | -1.5920804 | 0.087024376 |
| BERENJENO_TRANSFORMED_BY_RHOA_DN                     | -1.5919138 | 0.08696629  |
| ONDER_CDH1_SIGNALING_VIA_CTNNB1                      | -1.591806  | 0.08687716  |
| MANTOVANI_NFKB_TARGETS_UP                            | -1.5917011 | 0.08675475  |
| HELLER_HDAC_TARGETS_SILENCED_BY_METHYLATION_UP       | -1.5916796 | 0.0865851   |
| PEDERSEN_METASTASIS_BY_ERBB2_ISOFORM_1               | -1.5914954 | 0.08656395  |
| MIKKELSEN_ES_HCP_WITH_H3_UNMETHYLATED                | -1.5909232 | 0.086827606 |
| REACTOME_BILE_ACID_AND_BILE_SALT_METABOLISM          | -1.59025   | 0.08724277  |
| REACTOME_OPIOID_SIGNALING                            | -1.5901778 | 0.08710928  |
| NABA_ECM_GLYCOPROTEINS                               | -1.5896275 | 0.087389655 |
| REACTOME_INWARDLY_RECTIFYING_K_CHANNELS              | -1.5895164 | 0.08731158  |
| LEE_NEURAL_CRESCENT_STEM_CELL_UP                     | -1.5888302 | 0.08765914  |
| MOROSSETTI_FACIOSCAPULOHUMERAL_MUSCULAR_DISTROPHY_UP | -1.5887387 | 0.08756246  |
| WAMUNYOKOLI_OVARIAN_CANCER_LMP_DN                    | -1.5886121 | 0.08749677  |
| AMIT_EGF_RESPONSE_60_HELA                            | -1.5884938 | 0.08743667  |
| UEDA_CENTRAL_CLOCK                                   | -1.5879171 | 0.087647654 |
| XU_GH1_EXOGENOUS_TARGETS_UP                          | -1.5871218 | 0.08818402  |
| UZONYI_RESPONSE_TO_LEUKOTRIENE_AND_THROMBIN          | -1.5865059 | 0.08853167  |
| BRIDEAU_IMPRINTED_GENES                              | -1.5864549 | 0.08836649  |
| SHEN_SMARCA2_TARGETS_DN                              | -1.5862415 | 0.08837584  |
| PID_INTEGRIN_A9B1_PATHWAY                            | -1.5862372 | 0.0881958   |
| DEBOSSCHER_NFKB_TARGETS_REPRESSED_BY_GLUCOCORTICOIDS | -1.5856787 | 0.088456914 |

|                                                                                  |            |             |
|----------------------------------------------------------------------------------|------------|-------------|
| KEGG_VASCULAR_SMOOTH_MUSCLE_CONTRACTION                                          | -1.5853366 | 0.08855244  |
| HUMMERICH_MALIGNANT_SKIN_TUMOR_DN                                                | -1.5853044 | 0.088391915 |
| MALONEY_RESPONSE_TO_17AAG_UP                                                     | -1.5852275 | 0.08826527  |
| LU_AGING_BRAIN_DN                                                                | -1.5847819 | 0.08851484  |
| DELACROIX_RAR_TARGETS_DN                                                         | -1.5834174 | 0.08949886  |
| BIOCARTA_NGF_PATHWAY                                                             | -1.5833852 | 0.08934054  |
| KEGG_TGF_BETA_SIGNALING_PATHWAY                                                  | -1.5830783 | 0.08940642  |
| FLOTHO_PEDIATRIC_ALL_THERAPY_RESPONSE_UP                                         | -1.5830095 | 0.08927523  |
| TOMLINS_PROSTATE_CANCER_DN                                                       | -1.5829076 | 0.08916637  |
| DELYS_THYROID_CANCER_DN                                                          | -1.5827781 | 0.089085005 |
| MIKKELSEN_NPC_LCP_WITH_H3K4ME3                                                   | -1.5824375 | 0.08923819  |
| KHETCHOUMIAN_TRIM24_TARGETS_UP                                                   | -1.5822107 | 0.089237265 |
| SENESE_HDAC1_AND_HDAC2_TARGETS_DN                                                | -1.5821612 | 0.08908887  |
| REACTOME_MUSCLE_CONTRACTION                                                      | -1.5820345 | 0.08901737  |
| HAN_SATB1_TARGETS_DN                                                             | -1.5815297 | 0.08923712  |
| WEST_ADRENOCORTICAL_TUMOR_MARKERS_DN                                             | -1.5813217 | 0.08923606  |
| REACTOME_REGULATION_OF_HYPOXIA_INDUCIBLE_FACTOR_HIF_BY_OXYGEN                    | -1.5811887 | 0.08917328  |
| GUENTHER_GROWTH_SPHERICAL_VS_ADHERENT_DN                                         | -1.5811882 | 0.08899349  |
| MOREAUX_MULTIPLE_MYELOMA_BY_TACI_UP                                              | -1.5811251 | 0.08888509  |
| HOQUE_METHYLATED_IN_CANCER                                                       | -1.5809454 | 0.08887815  |
| PID_ATF2_PATHWAY                                                                 | -1.5807076 | 0.08894761  |
| SHETH_LIVER_CANCER_VS_TXNIP_LOSS_PAM4                                            | -1.5804325 | 0.0890483   |
| GALINDO_IMMUNE_RESPONSE_TO_ENTEROTOXIN                                           | -1.5800512 | 0.08922506  |
| REACTOME_PROSTACYCLIN_SIGNALING_THROUGH_PROSTACYCLIN_RECEPTOR                    | -1.5796143 | 0.08935066  |
| HINATA_NFKB_TARGETS_FIBROBLAST_UP                                                | -1.5795392 | 0.08924371  |
| KEGG_RENIN_ANGIOTENSIN_SYSTEM                                                    | -1.5795226 | 0.08907989  |
| GHANDHI_DIRECT_IRRADIATION_UP                                                    | -1.5783875 | 0.08989861  |
| BIOCARTA_NOS1_PATHWAY                                                            | -1.578126  | 0.08996095  |
| GRADE_COLON_AND_RECTAL_CANCER_DN                                                 | -1.5780418 | 0.089856915 |
| SCHRAETS_MLL_TARGETS_UP                                                          | -1.5772396 | 0.090407625 |
| PYEON_CANCER_HEAD_AND_NECK_VS_CERVICAL_DN                                        | -1.5771084 | 0.09035474  |
| NAKAMURA_ADIPOGENESIS_EARLY_DN                                                   | -1.5768374 | 0.0903813   |
| REACTOME_HDL_MEDIATED_LIPID_TRANSPORT                                            | -1.5752221 | 0.0915633   |
| PETROVA_PROX1_TARGETS_DN                                                         | -1.5745323 | 0.09198144  |
| GESERICK_TERT_TARGETS_DN                                                         | -1.5735027 | 0.09258178  |
| TONKS_TARGETS_OF_RUNX1_RUNX1T1_FUSION GRANULOCYTE_UP                             | -1.5730397 | 0.0927604   |
| NIELSEN_SCHWANNOMA_DN                                                            | -1.572965  | 0.092654966 |
| LINDGREN_BLADDER_CANCER_CLUSTER_2A_DN                                            | -1.5728273 | 0.09258216  |
| ROZANOV_MMP14_TARGETS_DN                                                         | -1.5726256 | 0.09256584  |
| TSENG_ADIPOGENIC_POTENTIAL_UP                                                    | -1.5723294 | 0.092656426 |
| NIELSEN_LIPOSARCOMA_UP                                                           | -1.5722195 | 0.09259031  |
| WONG_ENDMETRIUM_CANCER_DN                                                        | -1.5720284 | 0.092553735 |
| HUMMERICH_BENIGN_SKIN_TUMOR_DN                                                   | -1.5709064 | 0.09333786  |
| GUO_HEX_TARGETS_UP                                                               | -1.5705788 | 0.09347147  |
| KYNG_DNA_DAMAGE_BY_4NQO_OR_GAMMA_RADIATION                                       | -1.5705076 | 0.09336741  |
| SMITH_TERT_TARGETS_DN                                                            | -1.5703081 | 0.093364075 |
| ST_INTEGRIN_SIGNALING_PATHWAY                                                    | -1.5698369 | 0.09363636  |
| GAUSSMANN_MLL_AF4_FUSION_TARGETS_F_UP                                            | -1.5693492 | 0.09384735  |
| KIM_WT1_TARGETS_UP                                                               | -1.5690991 | 0.09389251  |
| PICCALUGA_ANGIOIMMUNOBLASTIC_LYMPHOMA_UP                                         | -1.5687898 | 0.09396704  |
| SMIRNOV_CIRCULATING_ENDOTHELIOCYTES_IN_CANCER_UP                                 | -1.568765  | 0.09379877  |
| BOUDOUKHA_BOUND_BY_IGF2BP2                                                       | -1.568638  | 0.09372834  |
| PID_INTEGRIN3_PATHWAY                                                            | -1.5683509 | 0.09385366  |
| LIN_NPAS4_TARGETS_DN                                                             | -1.56802   | 0.0939048   |
| PID_FRA_PATHWAY                                                                  | -1.567805  | 0.09391558  |
| LIU_IL13_MEMORY_MODEL_UP                                                         | -1.5676502 | 0.093877755 |
| HU_ANGIOGENESIS_UP                                                               | -1.567584  | 0.09376705  |
| REACTOME_SIGNALING_BY_PDGF                                                       | -1.567364  | 0.09377925  |
| PID_ARF6_PATHWAY                                                                 | -1.567283  | 0.093658604 |
| CHIARADONNA_NEOPLASTIC_TRANSFORMATION_CDC25_UP                                   | -1.5663633 | 0.09424369  |
| HOOI_ST7_TARGETS_UP                                                              | -1.5661073 | 0.094283834 |
| REACTOME_NEGATIVE_REGULATION_OF_FGFR_SIGNALING                                   | -1.565246  | 0.09493362  |
| DURAND_STROMA_NS_UP                                                              | -1.5651263 | 0.09485172  |
| SCHWAB_TARGETS_OF_BMYB_POLYMORPHIC_VARIANTS_DN                                   | -1.5646204 | 0.095154494 |
| LINDGREN_BLADDER_CANCER_CLUSTER_2B                                               | -1.564515  | 0.09507035  |
| WESTON_VEGFA_TARGETS_12HR                                                        | -1.5644082 | 0.09497583  |
| AZARE_NEOPLASTIC_TRANSFORMATION_BY_STAT3_UP                                      | -1.5643635 | 0.09481965  |
| WEINMANN_ADAPTATION_TO_HYPOXIA_DN                                                | -1.5640689 | 0.094884224 |
| PAPASPYRIDONOS_UNSTABLE_ATEROSCLEROTIC_PLAQUE_DN                                 | -1.5638651 | 0.09488176  |
| WIERENGA_STAT5A_TARGETS_GROUP1                                                   | -1.5631413 | 0.09532731  |
| MULLIGHAN_MLL_SIGNATURE_1_DN                                                     | -1.563125  | 0.09516945  |
| HELLEBREKERS_SILENCED_DURING_TUMOR_ANGIOGENESIS                                  | -1.5630897 | 0.095059134 |
| LABBE_TARGETS_OF_TGFB1_AND_WNT3A_UP                                              | -1.5629008 | 0.09506066  |
| LI_WILMS_TUMOR                                                                   | -1.5628914 | 0.094902456 |
| BURTON_ADIPOGENESIS_8                                                            | -1.562736  | 0.09487083  |
| KEGG_GLYCINE_SERINE_AND_THREONINE_METABOLISM                                     | -1.5627042 | 0.094718024 |
| MIKKELSEN_MCV6_HCP_WITH_H3K27ME3                                                 | -1.5624636 | 0.09472369  |
| PID_SYNDECAN_2_PATHWAY                                                           | -1.5623127 | 0.094714746 |
| HIRSCH_CELLULAR_TRANSFORMATION_SIGNATURE_UP                                      | -1.5622195 | 0.094599165 |
| REACTOME_PTM_GAMMA_CARBOXYLATION_HYPUSINE_FORMATION_AND_ARYLSULFATASE_ACTIVATION | -1.5621148 | 0.09453417  |

|                                                         |            |             |
|---------------------------------------------------------|------------|-------------|
| PARENT_MTOR_SIGNALING_DN                                | -1.5620579 | 0.0944054   |
| PID_NFAT_TFPATHWAY                                      | -1.5619211 | 0.09434553  |
| KANG_AR_TARGETS_DN                                      | -1.5617317 | 0.09435785  |
| BOYLAN_MULTIPLE_MYELOMA_D_UP                            | -1.5616881 | 0.09422385  |
| KEGG_PROXIMAL_TUBULE_BICARBONATE_RECLAMATION            | -1.56144   | 0.094352156 |
| KUNINGER_IGF1_VS_PDGF_TARGETS_DN                        | -1.5611176 | 0.09452528  |
| SCHLESINGER_H3K27ME3_IN_NORMAL_AND_METHYLATED_IN_CANCER | -1.560841  | 0.09460288  |
| CHIARADONNA_NEOPLASTIC_TRANSFORMATION_KRAS_CDC25_DN     | -1.5601264 | 0.09499952  |
| LEIN_PONS_MARKERS                                       | -1.5594497 | 0.0954318   |
| ENK_UV_RESPONSE_EPIDERMIS_DN                            | -1.5593656 | 0.09535518  |
| HATADA_METHYLATED_IN_LUNG_CANCER_UP                     | -1.5593622 | 0.09519654  |
| MIKKELSEN_ES_LCP_WITH_H3K4ME3                           | -1.5589321 | 0.09541919  |
| HOSHIDA_LIVER_CANCER_LATE_RECURRENCE_DN                 | -1.5588816 | 0.095293365 |
| ZHANG_ANTIVIRAL_RESPONSE_TO_RIBAVIRIN_DN                | -1.5587465 | 0.095262975 |
| BOQUEST_STEM_CELL_DN                                    | -1.5584636 | 0.09535003  |
| ODONNELL_METASTASIS_UP                                  | -1.5583016 | 0.09530419  |
| REACTOME_BIOLOGICAL_OXIDATIONS                          | -1.5581957 | 0.095250905 |
| CHIANG_LIVER_CANCER_SUBCLASS_CTNNB1_UP                  | -1.5579914 | 0.09524573  |
| SUZUKI_RESPONSE_TO_TSA_AND_DECITABINE_1B                | -1.5575725 | 0.09546366  |
| CORRE_MULTIPLE_MYELOMA_DN                               | -1.557386  | 0.095487185 |
| BIOCARTA_GCR_PATHWAY                                    | -1.557343  | 0.09536673  |
| NGUYEN_NOTCH1_TARGETS_DN                                | -1.5566754 | 0.095814064 |
| WESTON_VEGFA_TARGETS                                    | -1.5565288 | 0.095785774 |
| REACTOME_CYTOCHROME_P450_ARRANGED_BY_SUBSTRATE_TYPE     | -1.5558156 | 0.09628057  |
| KEGG_PHENYLALANINE_METABOLISM                           | -1.5556611 | 0.09625593  |
| RIZ_ERYTHROID_DIFFERENTIATION_6HR                       | -1.5556402 | 0.09610379  |
| RICKMAN_HEAD_AND_NECK_CANCER_F                          | -1.5552361 | 0.09633196  |
| KEGG_RETINOL_METABOLISM                                 | -1.5545399 | 0.09680422  |
| SILIGAN_BOUND_BY_EWS_FLT1_FUSION                        | -1.554516  | 0.09666375  |
| HUANG_FOXA2_TARGETS_UP                                  | -1.5542332 | 0.0966867   |
| LEE_LIVER_CANCER_CIPROFIBRATE_UP                        | -1.5540342 | 0.09669693  |
| BIOCARTA_IL1R_PATHWAY                                   | -1.553206  | 0.097325586 |
| WOO_LIVER_CANCER_RECURRENCE_UP                          | -1.5530605 | 0.097262576 |
| PID_ARF6_TRAFFICKING_PATHWAY                            | -1.5527256 | 0.097405605 |
| CHICAS_RB1_TARGETS_CONFLUENT                            | -1.5525342 | 0.09740705  |
| DORN_ADENOVIRUS_INFECTION_12HR_UP                       | -1.5524173 | 0.09734637  |
| BIOCARTA_VEGF_PATHWAY                                   | -1.5522989 | 0.09728114  |
| REACTOME_AMINE_LIGAND_BINDING_RECEPTORS                 | -1.5517216 | 0.097621605 |
| ZHANG_TARGETS_OF_EWSR1_FL11_FUSION                      | -1.5511287 | 0.09801256  |
| ROY_WOUND_BLOOD_VESSEL_UP                               | -1.5510052 | 0.09796461  |
| POS_HISTAMINE_RESPONSE_NETWORK                          | -1.5501409 | 0.09861659  |
| LEE_LIVER_CANCER_HEPATOBLAST                            | -1.549627  | 0.09894966  |
| KIM_ALL_DISORDERS_CALB1_CORR_DN                         | -1.5494252 | 0.09894173  |
| BIOCARTA_CYTOKINE_PATHWAY                               | -1.5491881 | 0.09900801  |
| DELASERNA_MYOD_TARGETS_UP                               | -1.5491606 | 0.09887873  |
| WU_ALZHEIMER_DISEASE_DN                                 | -1.5488647 | 0.09896421  |
| GRADE_COLON_VS_RECTAL_CANCER_UP                         | -1.5485556 | 0.09910008  |
| FRIDMAN_IMMORTALIZATION_DN                              | -1.5470127 | 0.10030256  |
| IIZUKA_LIVER_CANCER_PROGRESSION_G2_G3_UP                | -1.5469561 | 0.100196205 |
| LI_CISPLATIN_RESISTANCE_UP                              | -1.5469021 | 0.10008018  |
| RIGGI_EWING_SARCOMA_PROGENITOR_UP                       | -1.5467086 | 0.10008369  |
| CHANDRAN_METASTASIS_DN                                  | -1.5466425 | 0.09998388  |
| KEGG_MTOR_SIGNALING_PATHWAY                             | -1.5459533 | 0.10040197  |
| WINNEPENINCKX_MELANOMA_METASTASIS_DN                    | -1.5452616 | 0.100893386 |
| SCHRAMM_INHBA_TARGETS_DN                                | -1.545115  | 0.10086314  |
| KATSANOUELAVL1_TARGETS_UP                               | -1.545034  | 0.10076462  |
| YAGI_AML_WITH_INV_16_TRANSLOCATION                      | -1.5449228 | 0.100706376 |
| HUI_MAPK14_TARGETS_UP                                   | -1.5447781 | 0.100673355 |
| BIOCARTA_IL6_PATHWAY                                    | -1.5446829 | 0.100618295 |
| PID_INTEGRIN1_PATHWAY                                   | -1.5442823 | 0.100803964 |
| DITTMER_PTHLH_TARGETS_DN                                | -1.5437143 | 0.10118233  |
| PID_SYNDECAN_4_PATHWAY                                  | -1.5436373 | 0.101093136 |
| MAHAJAN_RESPONSE_TO_IL1A_UP                             | -1.5432948 | 0.10128681  |
| REACTOME_THROMBOXANE_SIGNALING_THROUGH_TP_RECEPTOR      | -1.5429404 | 0.101430744 |
| KEGG_AXON_GUIDANCE                                      | -1.5428717 | 0.10131631  |
| KEGG_ALPHA_LINOLENIC_ACID_METABOLISM                    | -1.5425731 | 0.101433806 |
| REACTOME_TOLL_RECEPTOR_CASCADES                         | -1.54225   | 0.10149227  |
| HOELZEL_NF1_TARGETS_UP                                  | -1.5418519 | 0.10171015  |
| ABRAHAM_ALPC_VS_MULTIPLE_MYELOMA_UP                     | -1.5417074 | 0.10166721  |
| PID_INTEGRIN2_PATHWAY                                   | -1.5412987 | 0.10190103  |
| PID_IL8_CXCR1_PATHWAY                                   | -1.5411233 | 0.10188876  |
| CLASPER_LYMPHATIC_VESSELS_DURING_METASTASIS_DN          | -1.5409367 | 0.10186549  |
| PID_PTP1B_PATHWAY                                       | -1.5407051 | 0.10190296  |
| GUILLAUMOND_KLF10_TARGETS_DN                            | -1.5406266 | 0.101828285 |
| PEPPER_CHRONIC_LYMPHOCYTIC_LEUKEMIA_UP                  | -1.5404768 | 0.10182086  |
| GARGALOVIC_RESPONSE_TO_OXIDIZED_PHOSPHOLIPIDS_GREY_DN   | -1.5401813 | 0.10200121  |
| VANHARANTA_UTERINE_FIBROID_WITH_7Q_DELETION_DN          | -1.5401396 | 0.10186734  |
| XU_HGF_SIGNALING_NOT_VIA_AKT1_48HR_UP                   | -1.5397676 | 0.10206228  |
| BACOLOD_RESISTANCE_TO_ALKYLATING_AGENTS_UP              | -1.5392128 | 0.10245238  |
| GYORFFY_MITOXANTRONE_RESISTANCE                         | -1.5389513 | 0.10254035  |

|                                                                    |            |             |
|--------------------------------------------------------------------|------------|-------------|
| KATSANOUELAVL1_TARGETS_DN                                          | -1.5381775 | 0.103032276 |
| STAMBOLSKY_RESPONSE_TO_VITAMIN_D3_UP                               | -1.5381238 | 0.10292283  |
| SANA_TNF_SIGNALING_DN                                              | -1.5378022 | 0.103013866 |
| REACTOME_REGULATION_OF_INSULIN_SECRETION_BY_GLUCAGON_LIKE_PEPTIDE1 | -1.5377313 | 0.10292132  |
| YAO_TEMPORAL_RESPONSE_TO_PROGESTERONE_CLUSTER_5                    | -1.5376152 | 0.10286478  |
| SCHURINGA_STATS5A_TARGETS_UP                                       | -1.5375055 | 0.10279103  |
| REACTOME_CLASS_A1_RHODOPSIN_LIKE_RECEPTORS                         | -1.5370992 | 0.10295193  |
| IKEDA_MIR1_TARGETS_UP                                              | -1.5370946 | 0.10279441  |
| GOUYER_TATI_TARGETS_DN                                             | -1.5368199 | 0.102882    |
| KEGG_VEGF_SIGNALING_PATHWAY                                        | -1.5366547 | 0.10289731  |
| SCHUETZ_BREAST_CANCER_DUCTAL_INVASIVE_UP                           | -1.5364847 | 0.10288798  |
| CHANG_CORE_SERUM_RESPONSE_DN                                       | -1.5361143 | 0.103028    |
| UDAYAKUMAR_MED1_TARGETS_DN                                         | -1.5358926 | 0.10304599  |
| TAKEDA_TARGETS_OF_NUP98_HOXA9_FUSION_3D_DN                         | -1.5357736 | 0.10297148  |
| BIOCARTA_LAIR_PATHWAY                                              | -1.5351756 | 0.10335709  |
| ZHENG_IL22_SIGNALING_UP                                            | -1.5350552 | 0.103340805 |
| TONKS_TARGETS_OF_RUNX1_RUNX1T1_FUSION_SUSTAINED_IN_MONOCYTE_UP     | -1.5348059 | 0.103413    |
| REACTOME_METABOLISM_OF_CARBOHYDRATES                               | -1.5345389 | 0.10353034  |
| CERVERA_SDHB_TARGETS_2                                             | -1.5342532 | 0.10362936  |
| PID_RHODOPSIN_PATHWAY                                              | -1.5340805 | 0.103598244 |
| PID_SHP2_PATHWAY                                                   | -1.533765  | 0.10375839  |
| LINDSTEDT_DENDRITIC_CELL_MATURATION_D                              | -1.5335962 | 0.103755735 |
| PURBEY_TARGETS_OF_CTBP1_NOT_SATB1_UP                               | -1.5334495 | 0.10373123  |
| BURTON_ADIPOGENESIS_PEAK_AT_OHR                                    | -1.533337  | 0.103659704 |
| JEON_SMAD6_TARGETS_UP                                              | -1.5328226 | 0.10395074  |
| WESTON_VEGFA_TARGETS_6HR                                           | -1.5327588 | 0.103836216 |
| REACTOME_HEMOSTASIS                                                | -1.5327164 | 0.1037226   |
| GARGALOVIC_RESPONSE_TO_OXIDIZED_PHOSPHOLIPIDS_GREEN_UP             | -1.5326134 | 0.10364958  |
| EBAUER_TARGETS_OF_PAX3_FOXO1_FUSION_UP                             | -1.5325476 | 0.103564754 |
| MARCHINI TRABECTEDIN_RESISTANCE_UP                                 | -1.5323403 | 0.103600115 |
| TONKS_TARGETS_OF_RUNX1_RUNX1T1_FUSION_SUSTAINED_IN_ERYTHROCYTE_UP  | -1.5316094 | 0.104124516 |
| WANG_LSD1_TARGETS_DN                                               | -1.5315993 | 0.10397795  |
| GOTZMANN_EPITHELIAL_TO_MESENCHYMAL_TRANSITION_DN                   | -1.5315607 | 0.103860095 |
| BRUECKNER_TARGETS_OF_MIRLET7A3_DN                                  | -1.530548  | 0.10463105  |
| STREICHER_LSM1_TARGETS_DN                                          | -1.5305396 | 0.104480974 |
| GHANDHI_BYSTANDER_IRRADIATION_UP                                   | -1.5304819 | 0.10438734  |
| SENESE_HDAC1_AND_HDAC2_TARGETS_UP                                  | -1.5303962 | 0.104309626 |
| REACTOME_TRIGLYCERIDE_BIOSYNTHESIS                                 | -1.530256  | 0.104283236 |
| JOSEPH_RESPONSE_TO_SODIUM_BUTYRATE_UP                              | -1.5300508 | 0.104336314 |
| KASLER_HDAC7_TARGETS_2_DN                                          | -1.5292099 | 0.10496156  |
| WANG_IMMORTALIZED_BY_HOXA9_AND_MEIS1_DN                            | -1.5290151 | 0.10499507  |
| STEGER_ADIPOGENESIS_DN                                             | -1.5286431 | 0.105171956 |
| PLASARI_NFIC_TARGETS_BASAL_DN                                      | -1.5286112 | 0.105049215 |
| KANG_IMMORTALIZED_BY_TERT_UP                                       | -1.5279107 | 0.10556063  |
| BIOCARTA_AGR_PATHWAY                                               | -1.527892  | 0.1054131   |
| DELACROIX_RAR_BOUND_ES                                             | -1.5278434 | 0.10530183  |
| PANGAS_TUMOR_SUPPRESSION_BY_SMAD1_AND_SMAD5_UP                     | -1.5276212 | 0.105334915 |
| PID_AVB3_OPN_PATHWAY                                               | -1.5270184 | 0.10575271  |
| LIEN_BREAST_CARCINOMA_METAPLASTIC                                  | -1.5268093 | 0.105778605 |
| REACTOME_COLLAGEN_FORMATION                                        | -1.5264179 | 0.10601221  |
| REACTOME_SYNTHESIS_OF_BILE_ACIDS_AND_BILE_SALTS                    | -1.5263793 | 0.10590334  |
| WESTON_VEGFA_TARGETS_3HR                                           | -1.5262274 | 0.1059094   |
| SATO_SILENCED_BY_METHYLATION_IN_PANCREATIC_CANCER_2                | -1.5259001 | 0.10605899  |
| AMIT_EGF_RESPONSE_240_MCF10A                                       | -1.5255573 | 0.10620098  |
| SABATES_COLORECTAL_ADENOMA_DN                                      | -1.525205  | 0.10633884  |
| MILI_PSEUDOPODIA                                                   | -1.5251805 | 0.1062169   |
| NAKAYAMA_FGF2_TARGETS                                              | -1.5249398 | 0.106266655 |
| YAO_TEMPORAL_RESPONSE_TO_PROGESTERONE_CLUSTER_2                    | -1.5248699 | 0.106172085 |
| ABE_VEGFA_TARGETS                                                  | -1.5244988 | 0.1063607   |
| RIGGI_EWING_SARCOMA_PROGENITOR_DN                                  | -1.5242845 | 0.106419034 |
| KANG_GIST_WITH_PDGFR4_UP                                           | -1.5237379 | 0.106738195 |
| SASSON_RESPONSE_TO_FORSKOLIN_UP                                    | -1.5232764 | 0.10697336  |
| BERTUCCI_INVASIVE_CARCINOMA_DUCTAL_VS_LOBULAR_DN                   | -1.5232381 | 0.10683551  |
| AMIT_EGF_RESPONSE_480_MCF10A                                       | -1.5232034 | 0.10673053  |
| REACTOME_POTASSIUM_CHANNELS                                        | -1.5231231 | 0.10667614  |
| TONKS_TARGETS_OF_RUNX1_RUNX1T1_FUSION_HSC_UP                       | -1.5229414 | 0.10667993  |
| MARKEY_RB1_CHRONIC_LOF_DN                                          | -1.5229234 | 0.1065475   |
| BOYALT_LIVER_CANCER_SUBCLASS_G3_DN                                 | -1.522386  | 0.10694317  |
| VECCHI_GASTRIC_CANCER_EARLY_DN                                     | -1.5222242 | 0.10692493  |
| SPIRA_SMOKERS_LUNG_CANCER_UP                                       | -1.5216361 | 0.10727595  |
| JOHANSSON_BRAIN_CANCER_EARLY_VS_LATE_DN                            | -1.5215994 | 0.10716593  |
| NEWMAN_ERCC6_TARGETS_DN                                            | -1.5213324 | 0.10725483  |
| VANDELSLUIJS_NORMAL_EMBRYOS_DN                                     | -1.5211179 | 0.10729062  |
| BROWNE_HCMV_INFECTION_12HR_DN                                      | -1.5209125 | 0.10732615  |
| JAZAERI_BREAST_CANCER_BRCA1_VS_BRCA2_DN                            | -1.520142  | 0.10793432  |
| LI_CISPLATIN_RESISTANCE_DN                                         | -1.5200142 | 0.10786778  |
| BURTON_ADIPOGENESIS_5                                              | -1.5198207 | 0.1078796   |
| BILD_HRAS_ONCOGENIC_SIGNATURE                                      | -1.519791  | 0.107750826 |
| RAO_BOUND_BY_SALL4_ISOFORM_A                                       | -1.5195125 | 0.10784507  |
| LEE_AGING_CEREBELLUM_DN                                            | -1.5187175 | 0.108405575 |

|                                                                    |            |             |
|--------------------------------------------------------------------|------------|-------------|
| REACTOME_ACTIVATION_OF_GENES_BY_ATF4                               | -1.5184884 | 0.10848162  |
| REACTOME_PERK_REGULATED_GENE_EXPRESSION                            | -1.5183115 | 0.10849511  |
| GENTILE_UV_RESPONSE_CLUSTER_D7                                     | -1.5177461 | 0.10885485  |
| SHEDDEN_LUNG_CANCER_GOOD_SURVIVAL_A4                               | -1.517704  | 0.10875096  |
| GU_PDEF_TARGETS_UP                                                 | -1.5173789 | 0.10889381  |
| TSUNODA_CISPLATIN_RESISTANCE_UP                                    | -1.5173737 | 0.10875508  |
| VALK_AML_CLUSTER_10                                                | -1.5172571 | 0.10871812  |
| HOFFMANN_IMMATURE_TO_MATURE_B_LYMPHOCYTE_DN                        | -1.5171382 | 0.10870234  |
| SENESE_HDAC3_TARGETS_UP                                            | -1.5167212 | 0.108913824 |
| REACTOME_GLYCOSAMINOGLYCAN_METABOLISM                              | -1.5164326 | 0.10903313  |
| REACTOME_EICOSANOID_LIGAND_BINDING_RECEPTORS                       | -1.5156624 | 0.109656565 |
| GERHOLD_ADIPOGENESIS_DN                                            | -1.5153401 | 0.10980476  |
| FRIDMAN_SENESCENCE_UP                                              | -1.5143281 | 0.11062755  |
| REACTOME_G_ALPHA_Z_SIGNALLING_EVENTS                               | -1.5141625 | 0.110634856 |
| VALK_AML_CLUSTER_9                                                 | -1.5139453 | 0.11071123  |
| SERVITJA_ISLET_HNF1A_TARGETS_UP                                    | -1.5129291 | 0.111477934 |
| BIOCARTA_NFAT_PATHWAY                                              | -1.5127306 | 0.11150231  |
| KOBAYASHI_EGFR_SIGNALING_6HR_DN                                    | -1.5125031 | 0.11155006  |
| REACTOME_NUCLEAR_EVENTS_KINASE_AND_TRANSCRIPTION_FACTOR_ACTIVATION | -1.5122031 | 0.111666225 |
| DEMAGALHAES_AGING_UP                                               | -1.5120038 | 0.11167135  |
| WANG_CLASSIC_ADIPOGENIC_TARGETS_OF_PPARG                           | -1.51115   | 0.11198696  |
| REACTOME_SIGNALING_BY_HIPPO                                        | -1.5111619 | 0.112198345 |
| MCDOWELL_ACUTE_LUNG_INJURY_DN                                      | -1.5110456 | 0.112157695 |
| PID_AMB2_NEUTROPHILS_PATHWAY                                       | -1.5109328 | 0.112133436 |
| REACTOME_TIE2_SIGNALING                                            | -1.5106281 | 0.11227442  |
| REACTOME_INTEGRIN_CELL_SURFACE_INTERACTIONS                        | -1.5102122 | 0.112530015 |
| OSADA_ASCL1_TARGETS_UP                                             | -1.5102059 | 0.11238759  |
| KUNINGER_IGF1_VS_PDGF_TARGETS_UP                                   | -1.5099664 | 0.11246909  |
| WANG_TNF_TARGETS                                                   | -1.5099449 | 0.11234146  |
| BIOCARTA_PDGF_PATHWAY                                              | -1.5096874 | 0.11245006  |
| MEDINA_SMARCA4_TARGETS                                             | -1.5093197 | 0.11265857  |
| REACTOME_CA_DEPENDENT_EVENTS                                       | -1.5085828 | 0.11322339  |
| NAKAMURA_ADIPOGENESIS_LATE_DN                                      | -1.5084673 | 0.11317397  |
| BIOCARTA_EDG1_PATHWAY                                              | -1.5084614 | 0.11303091  |
| PETRETTO_CARDIAC_HYPERTROPHY                                       | -1.5079612 | 0.113313615 |
| BUKANOVICH_T_LYMPHOCYTE_HOMING_ON_TUMOR_DN                         | -1.5076177 | 0.11351102  |
| PARENT_MTOR_SIGNALING_UP                                           | -1.5069048 | 0.114034764 |
| JOHNSTONE_PARVB_TARGETS_3_UP                                       | -1.5064329 | 0.11437927  |
| ONGUSAHA_TP53_TARGETS                                              | -1.5058578 | 0.11473688  |
| NELSON_RESPONSE_TO_ANDROGEN_UP                                     | -1.5057602 | 0.11466477  |
| BOYALT_LIVER_CANCER_SUBCLASS_G56_DN                                | -1.5057409 | 0.114539094 |
| REACTOME_CHONDROITIN_SULFATE_DERMATAN_SULFATE_METABOLISM           | -1.5054824 | 0.11461517  |
| REACTOME_ACTIVATED_NOTCH1_TRANSMITS_SIGNAL_TO_THE_NUCLEUS          | -1.5053054 | 0.11463807  |
| MONNIER_POSTRADIATION_TUMOR_ESCAPE_DN                              | -1.5050937 | 0.11468069  |
| LI_WILMS_TUMOR_VS_FETAL_KIDNEY_1_UP                                | -1.504658  | 0.11495963  |
| PICCALUGA_ANGIOIMMUNOBLASTIC_LYMPHOMA_DN                           | -1.5042553 | 0.11519444  |
| KEGG_PYRUVATE_METABOLISM                                           | -1.503931  | 0.11536011  |
| KEGG_METABOLISM_OF_XENOBIOTICS_BY_CYTOCHROME_P450                  | -1.5037364 | 0.11541847  |
| PID_ER_NONGENOMIC_PATHWAY                                          | -1.5035361 | 0.11546003  |
| GAUSSMANN_MLL_AF4_FUSION_TARGETS_A_DN                              | -1.5032938 | 0.11553629  |
| GOLDRATH_IMMUNE_MEMORY                                             | -1.503147  | 0.11549338  |
| WINTER_HYPOXIA_UP                                                  | -1.5030329 | 0.115441576 |
| MILI_PSEUDOPODIA_CHEMOTAXIS_DN                                     | -1.5027026 | 0.11561207  |
| KAYO_AGING_MUSCLE_UP                                               | -1.501706  | 0.116427094 |
| MIKKELSEN_NPC_HCP_WITH_H3K4ME3_AND_H3K27ME3                        | -1.5016978 | 0.11629486  |
| KAYO_AGING_MUSCLE_DN                                               | -1.501478  | 0.1163767   |
| LEI_HOXC8_TARGETS_DN                                               | -1.5014623 | 0.11623645  |
| ICHIBA_GRAFT_VERSUS_HOST_DISEASE_35D_DN                            | -1.5009735 | 0.11655279  |
| KEGG_DILATED_CARDIOMYOPATHY                                        | -1.4997407 | 0.117647186 |
| VERHAAK_GLIOMASTOMA_MESENCHYMAL                                    | -1.4995219 | 0.11767836  |
| JECHLINGER_EPITHELIAL_TO_MESENCHYMAL_TRANSITION_DN                 | -1.499298  | 0.11773258  |
| MAHADEVAN_GIST_MORPHOLOGICAL_SWITCH                                | -1.4984816 | 0.118345186 |
| RUAN_RESPONSE_TO_TNF_TROGLITAZONE_UP                               | -1.4984407 | 0.11822459  |
| KEGG_PRION_DISEASES                                                | -1.4979812 | 0.1185443   |
| BIOCARTA_EGF_PATHWAY                                               | -1.4976841 | 0.11869633  |
| HU_GENOTOXIN_ACTION_DIRECT_VS_INDIRECT_4HR                         | -1.4976795 | 0.11854624  |
| HERNANDEZ_MITOTIC_ARREST_BY_DOCETAXEL_1_UP                         | -1.4973925 | 0.11865539  |
| NABA_PROTEOGLYCANS                                                 | -1.4969927 | 0.11885789  |
| KEGG_PATHWAYS_IN_CANCER                                            | -1.4969798 | 0.11872236  |
| ISSAEVA_MLL2_TARGETS                                               | -1.4969237 | 0.118610896 |
| KEGG_STARCH_AND_SUCROSE_METABOLISM                                 | -1.4968591 | 0.11853184  |
| TAKEDA_TARGETS_OF_NUP98_HOXA9_FUSION_6HR_UP                        | -1.4968543 | 0.118384354 |
| ODONNELL_TFRC_TARGETS_UP                                           | -1.4964101 | 0.11865117  |
| KEGG_MELANOMA                                                      | -1.4962007 | 0.11870951  |
| CHEMELLO_SOLEUS_VS_EDL_MYOFIBERS_UP                                | -1.4951161 | 0.119659245 |
| WILSON_PROTEASES_AT_TUMOR_BONE_INTERFACE_UP                        | -1.4950196 | 0.119599044 |
| RODWELL_AGING_KIDNEY_NO_BLOOD_UP                                   | -1.4942787 | 0.12017038  |
| HERNANDEZ_MITOTIC_ARREST_BY_DOCETAXEL_2_DN                         | -1.4940301 | 0.120300554 |
| PID_S1P_S1P3_PATHWAY                                               | -1.4937763 | 0.12040921  |
| SASSON_RESPONSE_TO_GONADOTROPHINS_UP                               | -1.4932027 | 0.120787226 |

|                                                           |            |             |
|-----------------------------------------------------------|------------|-------------|
| MISHRA_CARCINOMA_ASSOCIATED_FIBROBLAST_UP                 | -1.4923191 | 0.12151908  |
| OXFORD_RALA_OR_RALB_TARGETS_DN                            | -1.4922951 | 0.12140312  |
| WIERENGA_STAT5A_TARGETS_GROUP2                            | -1.492291  | 0.12125735  |
| WANG_BARRETTES_ESOPHAGUS_AND_ESOPHAGUS_CANCER_DN          | -1.4920466 | 0.12134806  |
| MIYAGAWA_TARGETS_OF_EWSR1_ETS_FUSIONS_UP                  | -1.4914175 | 0.121864304 |
| NADERI_BREAST_CANCER_PROGNOSIS_DN                         | -1.4912114 | 0.12192138  |
| NABA_BASEMENT_MEMBRANES                                   | -1.4911032 | 0.12186715  |
| TSENG_IRS1_TARGETS_UP                                     | -1.4908137 | 0.12200742  |
| VERHAAK_AML_WITH_NPM1_MUTATED_UP                          | -1.4897369 | 0.12292593  |
| REACTOME_PLATELET_SENSITIZATION_BY_LDL                    | -1.4896624 | 0.12285636  |
| HANN_RESISTANCE_TO_BCL2_INHIBITOR_UP                      | -1.489609  | 0.122741535 |
| YAO_TEMPORAL_RESPONSE_TO_PROGESTERONE_CLUSTER_16          | -1.488762  | 0.12350274  |
| REACTOME_CHYLOMICRON_MEDIATED_LIPID_TRANSPORT             | -1.488024  | 0.12407929  |
| CHEN_ETV5_TARGETS_SERTOLI                                 | -1.4875789 | 0.12437782  |
| BIOCARTA_TPO_PATHWAY                                      | -1.4873672 | 0.12439864  |
| BROWNE_HCMV_INFECTION_20HR_DN                             | -1.4872196 | 0.12439963  |
| OLSSON_E2F3_TARGETS_UP                                    | -1.4867798 | 0.12468807  |
| NOUSHMEHR_GBM_SILENCED_BY_METHYLATION                     | -1.4867183 | 0.12458624  |
| HAMAI_APOPTOSIS_VIA_TRAIL_DN                              | -1.4863245 | 0.12478341  |
| PLASARI_TGFB1_SIGNALING_VIA_NFIC_10HR_UP                  | -1.4860756 | 0.124894455 |
| THUM_SYSTOLIC_HEART_FAILURE_UP                            | -1.4858966 | 0.12492622  |
| MASRI_RESISTANCE_TO_TAMOXIFEN_AND_AROMATASE_INHIBITORS_DN | -1.4851614 | 0.12553097  |
| DE_YY1_TARGETS_UP                                         | -1.4849831 | 0.1255889   |
| RAMASWAMY_METASTASIS_DN                                   | -1.4840357 | 0.12636475  |
| CAIRO_LIVER_DEVELOPMENT_UP                                | -1.4837775 | 0.12647696  |
| JIANG_AGING_CEREBRAL_CORTEX_UP                            | -1.4836298 | 0.12647727  |
| COULOUARN_TEMPORAL_TGFB1_SIGNATURE_DN                     | -1.483623  | 0.12632516  |
| DAZARD_RESPONSE_TO_UV_SCC_UP                              | -1.4830158 | 0.12676042  |
| LEE_LIVER_CANCER_DENA_UP                                  | -1.482967  | 0.1266444   |
| REACTOME_AQUAPORIN_MEDIATED_TRANSPORT                     | -1.482712  | 0.12675641  |
| ROPERO_HDAC2_TARGETS                                      | -1.4822252 | 0.12715235  |
| VERRECCHIA_RESPONSE_TO_TGFB1_C1                           | -1.4817868 | 0.12742054  |
| ST_ERK1_ERK2_MAPK_PATHWAY                                 | -1.4815649 | 0.12748548  |
| COLIN_PILOCYTIC_ASTROCYTOMA_VS_GLIOMASTOMA_UP             | -1.4802274 | 0.12871589  |
| DACOSTA_ERCC3_ALLELE_XPCS_VS_TTD_DN                       | -1.480073  | 0.12871924  |
| MIKKELSEN_IPS_LCP_WITH_H3K4ME3                            | -1.4799056 | 0.12873545  |
| BIOCARTA_SPPA_PATHWAY                                     | -1.4794574 | 0.1290087   |
| YAO_HOXA10_TARGETS_VIA_PROGESTERONE_DN                    | -1.4793876 | 0.12894443  |
| SIMBULAN_PARP1_TARGETS_UP                                 | -1.4792339 | 0.12893593  |
| BONOME_OVARIAN_CANCER_SURVIVAL_OPTIMAL_DEBULKING          | -1.4789103 | 0.12910408  |
| ABE_VEGFA_TARGETS_2HR                                     | -1.4788235 | 0.12901035  |
| KEGG_GLYCEROLIPID_METABOLISM                              | -1.4787077 | 0.12899281  |
| ZHAN_MULTIPLE_MYELOMA_MF_UP                               | -1.4786829 | 0.1288573   |
| GAZDA_DIAMOND_BLACKFAN_ANEMIA_MYELOID_UP                  | -1.4784341 | 0.12894845  |
| QJ_HYPOXIA_TARGETS_OF_HIF1A_AND_FOXA2                     | -1.4782497 | 0.12898943  |
| KAAB_FAILED_HEART_ATRIUM_DN                               | -1.4780636 | 0.12904243  |
| MADAN_DPPA4_TARGETS                                       | -1.4779838 | 0.12894922  |
| DING_LUNG_CANCER_MUTATED_SIGNIFICANTLY                    | -1.4774942 | 0.1292961   |
| YAMASHITA_LIVER_CANCER_STEM_CELL_DN                       | -1.477214  | 0.12942888  |
| ABE_VEGFA_TARGETS_30MIN                                   | -1.4771501 | 0.12931904  |
| TSAI_RESPONSE_TO_RADIATION_THERAPY                        | -1.4766895 | 0.12965126  |
| PID_TOLL_ENDOGENOUS_PATHWAY                               | -1.4763023 | 0.1299113   |
| SARTIPY_BLUNTED_BY_INSULIN_RESISTANCE_DN                  | -1.4759444 | 0.13013649  |
| ROME_INSULIN_TARGETS_IN_MUSCLE_UP                         | -1.4757231 | 0.13023368  |
| MCGOWAN_RSP6_TARGETS_UP                                   | -1.475427  | 0.13039334  |
| PID_INTEGRIN_A4B1_PATHWAY                                 | -1.4753373 | 0.13032573  |
| FOURNIER_ACINAR_DEVELOPMENT_EARLY_UP                      | -1.475116  | 0.13038905  |
| JEPSEN_SMRT_TARGETS                                       | -1.4749007 | 0.13045661  |
| ACEVEDO_NORMAL_TISSUE_ADJACENT_TO_LIVER_TUMOR_DN          | -1.4742936 | 0.13087238  |
| ABBUD_LIF_SIGNALING_1_UP                                  | -1.4734819 | 0.13156374  |
| KARLSSON_TGFB1_TARGETS_DN                                 | -1.4730093 | 0.1319107   |
| LEE_CALORIE_RESTRICTION_NEOCORTEX_DN                      | -1.472753  | 0.13201512  |
| KEGG_LONG_TERM_DEPRESSION                                 | -1.4725999 | 0.13205077  |
| PID_SYNDECAN_3_PATHWAY                                    | -1.4725647 | 0.13193403  |
| HELLER_HDAC_TARGETS_UP                                    | -1.4724286 | 0.13194433  |
| PID_RXR_VDR_PATHWAY                                       | -1.4724107 | 0.13181487  |
| REACTOME_INCRETIN_SYNTHESIS_SECRETION_AND_INACTIVATION    | -1.472007  | 0.13207825  |
| BIOCARTA_IGF1_PATHWAY                                     | -1.4715533 | 0.1323459   |
| SIMBULAN_UV_RESPONSE_IMMORTALIZED_DN                      | -1.4712627 | 0.13247675  |
| SHEPARD_CRUSH_AND_BURN_MUTANT_UP                          | -1.4710721 | 0.13249776  |
| NEMETH_INFLAMMATORY_RESPONSE_LPS_UP                       | -1.4704174 | 0.13301139  |
| KEGG_NOD_LIKE_RECEPTOR_SIGNALING_PATHWAY                  | -1.4702481 | 0.13303605  |
| BIDUS_METASTASIS_DN                                       | -1.4700925 | 0.13304974  |
| IVANOVA_HEMATOPOIESIS_STEM_CELL                           | -1.4698308 | 0.13318688  |
| NAKAYAMA_SOFT_TISSUE_TUMORS_PCA2_DN                       | -1.4695752 | 0.133308    |
| MULLIGHAN_MLL_SIGNATURE_2_DN                              | -1.4692254 | 0.13348174  |
| IZADPANAH_STEM_CELL_ADIPOSE_VS_BONE_UP                    | -1.469194  | 0.1333606   |
| ALONSO_METASTASIS_DN                                      | -1.4689226 | 0.13350774  |
| LIEN_BREAST_CARCINOMA_METAPLASTIC_VS_DUCTAL_UP            | -1.4689045 | 0.13337623  |
| TERAMOTO_OPN_TARGETS_CLUSTER_6                            | -1.4687654 | 0.13336599  |

|                                                     |            |            |
|-----------------------------------------------------|------------|------------|
| CHO_NR4A1_TARGETS                                   | -1.4685956 | 0.13336787 |
| BIOCARTA_ECM_PATHWAY                                | -1.4680492 | 0.13382421 |
| DELACROIX_RAR_TARGETS_UP                            | -1.4679749 | 0.13376588 |
| BIOCARTA_KERATINOCYTE_PATHWAY                       | -1.4677116 | 0.13387352 |
| INGRAM_SHH_TARGETS_DN                               | -1.4668633 | 0.1345737  |
| LI_WILMS_TUMOR_VS_FETAL_KIDNEY_2_DN                 | -1.466542  | 0.1347478  |
| MARTINEZ_RB1_TARGETS_DN                             | -1.4664092 | 0.13473451 |
| FIGUEROA_AML_METHYLATION_CLUSTER_1_UP               | -1.4662505 | 0.13473907 |
| WENG_POR_DOSAGE                                     | -1.4656535 | 0.1351918  |
| WOO_LIVER_CANCER_RECURRENCE_DN                      | -1.4649068 | 0.1358313  |
| KIM_GLI2_TARGETS_UP                                 | -1.4645143 | 0.13607585 |
| MEISSNER_NPC_HCP_WITH_H3K4ME3_AND_H3K27ME3          | -1.4644989 | 0.13594241 |
| REACTOME_AXON_GUIDANCE                              | -1.4643425 | 0.13593622 |
| REACTOME_SIGNALING_BY_FGFR                          | -1.4641713 | 0.13594265 |
| TARTE_PLASMA_CELL_VS_PLASMABLAST_UP                 | -1.4641529 | 0.13580242 |
| OHGUCHI_LIVER_HNF4A_TARGETS_DN                      | -1.4640123 | 0.13580593 |
| REACTOME_FRS2_MEDIATED_CASCADE                      | -1.4628948 | 0.1367797  |
| REACTOME_PEPTIDE_LIGAND_BINDING_RECEPTORS           | -1.4625448 | 0.13701178 |
| KYNG_RESPONSE_TO_H2O2                               | -1.4625205 | 0.13688353 |
| OSADA_ASCL1_TARGETS_DN                              | -1.4623593 | 0.13689984 |
| HOSHIDA_LIVER_CANCER_SURVIVAL_DN                    | -1.4623051 | 0.13679993 |
| GENTILE_UV_RESPONSE_CLUSTER_D1                      | -1.4621559 | 0.13682622 |
| LAIHO_COLORECTAL_CANCER_SERRATED_UP                 | -1.4618772 | 0.1370148  |
| XU_RESPONSE_TO_TRETINOIN_AND_NSC682994_UP           | -1.4618342 | 0.13691571 |
| FLECHNER_BIOPSY_KIDNEY_TRANSPLANT_REJECTED_VS_OK_DN | -1.4616421 | 0.1369644  |
| LEIN_ASTROCYTE_MARKERS                              | -1.4616174 | 0.13684255 |
| KEGG_CYTOKINE_CYTOKINE_RECEPTOR_INTERACTION         | -1.461085  | 0.13722175 |
| MCCABE_HOXC6_TARGETS_CANCER_UP                      | -1.4606622 | 0.13756615 |
| JOHNSTONE_PARVB_TARGETS_1_DN                        | -1.4605937 | 0.13746868 |
| BIOCARTA_MET_PATHWAY                                | -1.4597903 | 0.13817257 |
| BIOCARTA_AMI_PATHWAY                                | -1.459743  | 0.13805245 |
| LEE_LIVER_CANCER_ACOX1_UP                           | -1.4594547 | 0.13823724 |
| MIKKELSEN_NPC_HCP_WITH_H3K27ME3                     | -1.4591495 | 0.13840106 |
| GOZGIT_ESR1_TARGETS_UP                              | -1.4590579 | 0.13832468 |
| ZHOU_INFLAMMATORY_RESPONSE_LPS_UP                   | -1.4590496 | 0.13817799 |
| SESTO_RESPONSE_TO_UV_C6                             | -1.4585091 | 0.13858196 |
| FULCHER_INFLAMMATORY_RESPONSE_LECTIN_VS_LPS_UP      | -1.4584169 | 0.13851786 |
| KEGG_ABC_TRANSPORTERS                               | -1.4583957 | 0.13839194 |
| BERENJENO_ROCK_SIGNALING_NOT_VIA_RHOA_DN            | -1.4578242 | 0.13885018 |
| RORIE_TARGETS_OF_EWSR1_FLI1_FUSION_UP               | -1.4577096 | 0.13881788 |
| PECE_MAMMARY_STEM_CELL_UP                           | -1.45729   | 0.13909511 |
| BROWNE_HCMV_INFECTION_14HR_DN                       | -1.4572157 | 0.13901179 |
| ABE_INNER_EAR                                       | -1.4569002 | 0.13917741 |
| PID_ERBB1_DOWNSTREAM_PATHWAY                        | -1.4543366 | 0.14176397 |
| BIOCARTA_STEM_PATHWAY                               | -1.4542146 | 0.14176987 |
| BIOCARTA_ERK_PATHWAY                                | -1.4541833 | 0.14164975 |
| SUBTIL_PROGESTIN_TARGETS                            | -1.4536608 | 0.14208592 |
| BASAKI_YBX1_TARGETS_DN                              | -1.4534845 | 0.14212552 |
| PID_FAK_PATHWAY                                     | -1.4528718 | 0.1426759  |
| TENEDINI_MEGAKARYOCYTE_MARKERS                      | -1.4527165 | 0.14267926 |
| GROSS_ELK3_TARGETS_UP                               | -1.4521081 | 0.14317728 |
| REACTOME_INTERACTION_BETWEEN_L1_AND_ANKYRINS        | -1.4520733 | 0.14306666 |
| MARTINEZ_RESPONSE_TO TRABECTEDIN_UP                 | -1.4520022 | 0.14298888 |
| NIELSEN_LEIOMYOSARCOMA_CNN1_UP                      | -1.4515921 | 0.14324215 |
| RUTELLA_RESPONSE_TO_HGF_VS_CSF2RB_AND_IL4_UP        | -1.4512328 | 0.14345105 |
| TAKAO_RESPONSE_TO_UVB_RADIATION_DN                  | -1.4509066 | 0.14360745 |
| BRUINS_UVC_RESPONSE_VIA_TP53_GROUP_D                | -1.4506052 | 0.14377846 |
| SESTO_RESPONSE_TO_UV_C3                             | -1.4504261 | 0.14379016 |
| LABBE_WNT3A_TARGETS_DN                              | -1.4503752 | 0.14368205 |
| KEGG_TYPE_II_DIABETES_MELLITUS                      | -1.450327  | 0.14358708 |
| CROONQUIST_IL6_DEPRIVATION_UP                       | -1.4502933 | 0.14346631 |
| ZIRN_TRETINOIN_RESPONSE_WT1_UP                      | -1.4498067 | 0.14380354 |
| BERENJENO_TRANSFORMED_BY_RHOA_FOREVER_DN            | -1.4497912 | 0.14367235 |
| TAKEDA_TARGETS_OF_NUP98_HOXA9_FUSION_10D_DN         | -1.4495037 | 0.14385289 |
| ONDER_CDH1_TARGETS_1_UP                             | -1.4493369 | 0.1438391  |
| CROMER_TUMORIGENESIS_UP                             | -1.4493272 | 0.14369643 |
| LIU_LIVER_CANCER                                    | -1.4493039 | 0.14356028 |
| REACTOME_PHOSPHOLIPASE_C_MEDIATED_CASCADE           | -1.4485233 | 0.14420316 |
| REACTOME_HEPARAN_SULFATE_HEPARIN_HS_GAG_METABOLISM  | -1.4478695 | 0.14467494 |
| ROLEF_GLI3_TARGETS                                  | -1.4478557 | 0.14454247 |
| REACTOME_SMOOTH_MUSCLE_CONTRACTION                  | -1.4476044 | 0.14464155 |
| LEE_AGING_MUSCLE_DN                                 | -1.4474006 | 0.1447011  |
| WU_SILENCED_BY_METHYLATION_IN_BLADDER_CANCER        | -1.4472936 | 0.14465192 |
| BEGUM_TARGETS_OF_PAX3_FOXO1_FUSION_UP               | -1.4472383 | 0.1445642  |
| HUMMERICH_SKIN_CANCER_PROGRESSION_UP                | -1.4470754 | 0.14456894 |
| NAKAYAMA_SOFT_TISSUE_TUMORS_PCA1_DN                 | -1.446925  | 0.1445909  |
| ZHONG_RESPONSE_TO_AZACITIDINE_AND_TSA_UP            | -1.4469025 | 0.14445856 |
| HAN_SATB1_TARGETS_UP                                | -1.44686   | 0.1443414  |
| GAUSSMANN_MLL_AF4_FUSION_TARGETS_G_UP               | -1.4468572 | 0.14419149 |
| HOELZEL_NF1_TARGETS_DN                              | -1.4468386 | 0.14405541 |

|                                                                          |            |            |
|--------------------------------------------------------------------------|------------|------------|
| GARGALOVIC_RESPONSE_TO_OXIDIZED_PHOSPHOLIPIDS_GREY_UP                    | -1.4464386 | 0.14435172 |
| REACTOME_ENOS_ACTIVATION_AND_REGULATION                                  | -1.4459896 | 0.14466082 |
| JACKSON_DNMT1_TARGETS_UP                                                 | -1.445621  | 0.14490116 |
| DAZARD_RESPONSE_TO_UV_NHEK_UP                                            | -1.4455454 | 0.14483115 |
| GENTILE_UV_HIGH_DOSE_UP                                                  | -1.4454808 | 0.14474303 |
| SHIN_B_CELL_LYMPHOMA_CLUSTER_5                                           | -1.4453973 | 0.1446976  |
| BIOCARTA_ALK_PATHWAY                                                     | -1.4445578 | 0.14544356 |
| KEGG_GNRH_SIGNALING_PATHWAY                                              | -1.4442286 | 0.14565007 |
| ST_WNT_BETA_CATENIN_PATHWAY                                              | -1.4438775 | 0.14586434 |
| CAIRO_LIVER_DEVELOPMENT_DN                                               | -1.4438037 | 0.14578377 |
| LABBE_TGFB1_TARGETS_DN                                                   | -1.4437425 | 0.1457036  |
| HESS_TARGETS_OF_HOXA9_AND_MEIS1_DN                                       | -1.443679  | 0.14561297 |
| CHENG_RESPONSE_TO_NICKEL_ACETATE                                         | -1.4433339 | 0.14584151 |
| REACTOME_THROMBIN_SIGNALING_THROUGH_PROTEINASE_ACTIVATED_RECEPTORS_PARS  | -1.4432886 | 0.14575197 |
| RAY_TUMORIGENESIS_BY_ERBB2_CDC25A_DN                                     | -1.4428419 | 0.146044   |
| PID_IL8_CXCR2_PATHWAY                                                    | -1.4428396 | 0.14589696 |
| ACEVEDO_LIVER_CANCER_WITH_H3K27ME3_UP                                    | -1.4421916 | 0.14646584 |
| CARD_MIR302A_TARGETS                                                     | -1.4414613 | 0.14708592 |
| WENG_POR_TARGETS_LIVER_UP                                                | -1.4413766 | 0.14702891 |
| WU_CELL_MIGRATION                                                        | -1.4413106 | 0.14694998 |
| VANLOO_SP3_TARGETS_DN                                                    | -1.4412868 | 0.1468192  |
| FERRARI_RESPONSE_TO_FENRETINIDE_UP                                       | -1.4411705 | 0.14679417 |
| KEGG_DRUG_METABOLISM_CYTOCHROME_P450                                     | -1.4409168 | 0.14688957 |
| BIOCARTA_TFF_PATHWAY                                                     | -1.4408157 | 0.1468555  |
| KEGG_AMINO_SUGAR_AND_NUCLEOTIDE_SUGAR_METABOLISM                         | -1.4406542 | 0.14687127 |
| GRABARCZYK_BCL11B_TARGETS_UP                                             | -1.4406307 | 0.14674097 |
| GAUSSMANN_MLL_AF4_FUSION_TARGETS_A_UP                                    | -1.4404672 | 0.146773   |
| BONOME_OVARIAN_CANCER_POOR_SURVIVAL_UP                                   | -1.4395871 | 0.14756033 |
| REACTOME_P13OCAS_LINKAGE_TO_MAPK_SIGNALING_FOR_INTEGRINS                 | -1.4395539 | 0.14743745 |
| PUIFFE_INVASION_INHIBITED_BY_ASCITES_DN                                  | -1.4394995 | 0.14735179 |
| NIKOLSKY_BREAST_CANCER_7P22_AMPLICON                                     | -1.4394817 | 0.14722879 |
| TAKEDA_TARGETS_OF_NUP98_HOXA9_FUSION_8D_DN                               | -1.4394115 | 0.14716277 |
| REACTOME_EXTRACELLULAR_MATRIX_ORGANIZATION                               | -1.4393177 | 0.14712211 |
| DAZARD_UV_RESPONSE_CLUSTER_G28                                           | -1.4391892 | 0.14713988 |
| RAGHAVACHARI_PLATELET_SPECIFIC_GENES                                     | -1.4390063 | 0.14718904 |
| LI_ADIPOGENESIS_BY_ACTIVATED_PPARG                                       | -1.4389583 | 0.14709829 |
| BROCKE_APOPTOSIS_REVERSED_BY_IL6                                         | -1.438215  | 0.14776479 |
| PLASARI_TGFB1_SIGNALING_VIA_NFIC_1HR_DN                                  | -1.4382052 | 0.14762762 |
| REACTOME_NEURONAL_SYSTEM                                                 | -1.4381391 | 0.14754935 |
| ROZANOV_MMP14_TARGETS_UP                                                 | -1.4378853 | 0.14765152 |
| KEGG_ETHER_LIPID_METABOLISM                                              | -1.4373205 | 0.14815328 |
| REACTOME_NUCLEAR_RECEPTOR_TRANSCRIPTION_PATHWAY                          | -1.4372829 | 0.1480285  |
| BERENJENO_TRANSFORMED_BY_RHOA_FOREVER_UP                                 | -1.4372556 | 0.14791322 |
| STEGER_ADIPOGENESIS_UP                                                   | -1.436722  | 0.14831305 |
| KOYAMA_SEMA3B_TARGETS_UP                                                 | -1.4365629 | 0.14832135 |
| DORN_ADENOVIRUS_INFECTION_24HR_DN                                        | -1.4364129 | 0.14833902 |
| REACTOME_A_TETRASACCHARIDE_LINKER_SEQUENCE_IS_REQUIRED_FOR_GAG_SYNTHESIS | -1.4351909 | 0.14955156 |
| GAVIN_FOXP3_TARGETS_CLUSTER_P4                                           | -1.435134  | 0.14945002 |
| WANG_ESOPHAGUS_CANCER_VS_NORMAL_DN                                       | -1.4350667 | 0.14936744 |
| IKEDA_MIR30_TARGETS_UP                                                   | -1.4349351 | 0.14934553 |
| RUTELLA_RESPONSE_TO_CSF2RB_AND_IL4_DN                                    | -1.434759  | 0.14939944 |
| VANDESLUIS_COMMD1_TARGETS_GROUP_3_DN                                     | -1.4346504 | 0.14935502 |
| GOTZMANN_EPITHELIAL_TO_MESENCHYMAL_TRANSITION_UP                         | -1.4344122 | 0.14943728 |
| DAVICIONI_RHABDOMYOSARCOMA_PAX_FOXO1_FUSION_UP                           | -1.4337281 | 0.1500086  |
| PID_AR_NONGENOMIC_PATHWAY                                                | -1.433707  | 0.1498844  |
| MANN_RESPONSE_TO_AMIFOSTINE_UP                                           | -1.4332498 | 0.15024288 |
| MULLIGHAN_NPM1_SIGNATURE_3_DN                                            | -1.4331506 | 0.1501809  |
| LEE_LIVER_CANCER_E2F1_UP                                                 | -1.4331352 | 0.15005282 |
| HOWLIN_CITED1_TARGETS_1_DN                                               | -1.433099  | 0.14996079 |
| THUM_MIR21_TARGETS_HEART_DISEASE_UP                                      | -1.4324484 | 0.15052056 |
| KEGG_STEROID_HORMONE_BIOSYNTHESIS                                        | -1.4324353 | 0.15038423 |
| BIOCARTA_GSK3_PATHWAY                                                    | -1.4323809 | 0.15028448 |
| DASU_IL6_SIGNALING_UP                                                    | -1.4314911 | 0.1511144  |
| REACTOME_INHIBITION_OF_INSULIN_SECRETION_BY_ADRENALINE_NORADRENALINE     | -1.4314811 | 0.15097223 |
| DACOSTA_ERCC3_ALLELE_XPCS_VS_TTD_UP                                      | -1.4303067 | 0.15204875 |
| CASTELLANO_NRAS_TARGETS_UP                                               | -1.4291176 | 0.1531492  |
| SASSON_RESPONSE_TO_GONADOTROPHINS_DN                                     | -1.4287778 | 0.15342028 |
| FIGUEROA_AML_METHYLATION_CLUSTER_5_DN                                    | -1.4283785 | 0.15371892 |
| KEGG_GLYCEROPHOSPHOLIPID_METABOLISM                                      | -1.4283493 | 0.15360266 |
| YAUCH_HEDGEHOG_SIGNALING_PARACRINE_UP                                    | -1.4281908 | 0.15364826 |
| BIOCARTA_INSULIN_PATHWAY                                                 | -1.4279387 | 0.15376826 |
| ZHOU_TNF_SIGNALING_4HR                                                   | -1.4277717 | 0.15379083 |
| LEIN_MIDBRAIN_MARKERS                                                    | -1.4271296 | 0.15436189 |
| DAVICIONI_PAX_FOXO1_SIGNATURE_IN_ARMS_DN                                 | -1.4266313 | 0.15476535 |
| DORN_ADENOVIRUS_INFECTION_48HR_DN                                        | -1.4263331 | 0.15495251 |
| BURTON_ADIPOGENESIS_10                                                   | -1.4249818 | 0.15623002 |
| NIELSEN_LEIOMYOSARCOMA_CNN1_DN                                           | -1.4243703 | 0.15672919 |
| INGA_TP53_TARGETS                                                        | -1.4225347 | 0.15846968 |
| HOOL_ST7_TARGETS_DN                                                      | -1.4215132 | 0.15941285 |
| KEGG_NICOTINATE_AND_NICOTINAMIDE_METABOLISM                              | -1.4212086 | 0.15957652 |

|                                                     |            |            |
|-----------------------------------------------------|------------|------------|
| SMID_BREAST_CANCER_LUMINAL_A_UP                     | -1.4207767 | 0.15984364 |
| MIKKELSEN_IPS_ICP_WITH_H3K4ME3_AND_H327ME3          | -1.4205712 | 0.15992345 |
| NUTT_GBM_VS_AO_GLIOMA_UP                            | -1.4202898 | 0.16008331 |
| TAVAZOIE_METASTASIS                                 | -1.4201168 | 0.160147   |
| BIOCARTA_CCR3_PATHWAY                               | -1.4198129 | 0.16031154 |
| SATO_SILENCED_BY_METHYLATION_IN_PANCREATIC_CANCER_1 | -1.4195487 | 0.160499   |
| MARIADASON_REGULATED_BY_HISTONE_ACETYLATION_UP      | -1.419486  | 0.16040657 |
| KANG_AR_TARGETS_UP                                  | -1.4193175 | 0.16044211 |
| PAL_PRMT5_TARGETS_DN                                | -1.4192073 | 0.1603957  |
| HERNANDEZ_MITOTIC_ARREST_BY_DOCETAXEL_1_DN          | -1.418987  | 0.16049579 |
| HOFFMANN_LARGE_TO_SMALL_PRE_BII_LYMPHOCYTE_DN       | -1.4181479 | 0.16118258 |
| ZEMBUTSU_SENSITIVITY_TO_MITOMYCIN                   | -1.4180484 | 0.16112432 |
| REACTOME_COMPLEMENT_CASCADE                         | -1.4177092 | 0.1613362  |
| REACTOME_SEMAPHORIN_INTERACTIONS                    | -1.4176106 | 0.16129805 |
| NIELSEN_GIST_AND_SYNOVIAL_SARCOMA_DN                | -1.4172676 | 0.1615285  |
| KRIEG_HYPOXIA_VIA_KDM3A                             | -1.4172051 | 0.16144595 |
| KEGG_INSULIN_SIGNALING_PATHWAY                      | -1.4170123 | 0.1614895  |
| GILDEA_METASTASIS                                   | -1.4168868 | 0.16149525 |
| WATTEL_AUTONOMOUS_THYROID_ADENOMA_DN                | -1.4167209 | 0.16155206 |
| KEGG_REGULATION_OF_ACTIN_CYTOSKELETON               | -1.415861  | 0.16232666 |
| HORIUCHI_WTAP_TARGETS_UP                            | -1.4147947 | 0.16328423 |
| RICKMAN_TUMOR_DIFFERENTIATED_WELL_VS_MODERATELY_DN  | -1.4146242 | 0.1633134  |
| ONKEN_UVEAL_MELANOMA_DN                             | -1.4146098 | 0.16318442 |
| SEIDEN_ONCOGENESIS_BY_MET                           | -1.4145149 | 0.16313052 |
| REACTOME_EGFR_DOWNREGULATION                        | -1.4135771 | 0.16400667 |
| REACTOME_ABC_FAMILY_PROTEINS_MEDIATED_TRANSPORT     | -1.4134405 | 0.16399081 |
| KIM_ALL_DISORDERS_OLIGODENDROCYTE_NUMBER_CORR_DN    | -1.4125428 | 0.16486065 |
| REACTOME_SHC_MEDIATED_CASCADE                       | -1.4124056 | 0.1648478  |
| WANG_HCP_PROSTATE_CANCER                            | -1.4122198 | 0.16493253 |
| DARWICHE_PAPILLOMA_RISK_HIGH_DN                     | -1.4119931 | 0.16500914 |
| CHIANG_LIVER_CANCER_SUBCLASS_CTNNB1_DN              | -1.4119576 | 0.16488999 |
| ZIRN_TRETINOIN_RESPONSE_UP                          | -1.4117302 | 0.16498435 |
| REACTOME_GLYCOLYSIS                                 | -1.4117218 | 0.16533954 |
| BOYALT_LIVER_CANCER_SUBCLASS_G2                     | -1.4108171 | 0.16571474 |
| VALK_AML_CLUSTER_13                                 | -1.4104937 | 0.1659038  |
| CHESLER_BRAIN_HIGHEST_EXPRESSION                    | -1.4103819 | 0.16587098 |
| PID_HDAC_CLASSIII_PATHWAY                           | -1.4100292 | 0.1661332  |
| PID_REG_GR_PATHWAY                                  | -1.41002   | 0.16598822 |
| MA_PITUITARY_FETAL_VS_ADULT_UP                      | -1.4098874 | 0.16599484 |
| REACTOME_G_ALPHA_I_SIGNALING_EVENTS                 | -1.4097222 | 0.16605519 |
| LENAOUR_DENDRITIC_CELL_MATURATION_UP                | -1.4093765 | 0.16625588 |
| KEGG_JAK_STAT_SIGNALING_PATHWAY                     | -1.4088519 | 0.16669631 |
| PHONG_TNF_RESPONSE_NOT_VIA_P38                      | -1.4088253 | 0.16656765 |
| CHIANG_LIVER_CANCER_SUBCLASS_UNANNOTATED_UP         | -1.4086034 | 0.16666646 |
| LIU_VAV3_PROSTATE_CARCINOGENESIS_UP                 | -1.4085224 | 0.16659218 |
| TOOKER_GEMCITABINE_RESISTANCE_DN                    | -1.4084524 | 0.16652425 |
| GRAHAM_CML_QUIESCENT_VS_NORMAL_DIVIDING_UP          | -1.4081503 | 0.16667815 |
| POMEROY_MEDULLOBLASTOMA_PROGNOSIS_UP                | -1.4080235 | 0.16666442 |
| ENGELMANN_CANCER_PROGENITORS_UP                     | -1.4080181 | 0.1665145  |
| MEISSNER_NPC_HCP_WITH_H3_UNMETHYLATED               | -1.4070017 | 0.16752881 |
| SEKI_INFLAMMATORY_RESPONSE_LPS_UP                   | -1.406443  | 0.16798982 |
| VALK_AML_WITH_EVI1                                  | -1.406249  | 0.16804947 |
| KIM_MYC_AMPLIFICATION_TARGETS_UP                    | -1.4057059 | 0.16850871 |
| CHEBOTAEV_GR_TARGETS_UP                             | -1.4051421 | 0.16900851 |
| XU_GH1_EXOGENOUS_TARGETS_DN                         | -1.4051274 | 0.16888116 |
| KAAB_FAILED_HEART_ATRIUM_UP                         | -1.4050106 | 0.16885509 |
| PASINI_SUZ12_TARGETS_UP                             | -1.404814  | 0.16890053 |
| BROWNE_HCMV_INFECTION_10HR_UP                       | -1.4046112 | 0.16897173 |
| ACOSTA_PROLIFERATION_INDEPENDENT_MYC_TARGETS_DN     | -1.4045376 | 0.16889265 |
| CHIBA_RESPONSE_TO_TSA                               | -1.4035734 | 0.1697762  |
| TAVOR_CEBPA_TARGETS_UP                              | -1.4035547 | 0.16963068 |
| TIAN_TNF_SIGNALING_VIA_NFKB                         | -1.4033943 | 0.16965967 |
| BIOCARTA_HDAC_PATHWAY                               | -1.4031569 | 0.16976883 |
| ZWANG_CLASS_1_TRANSIENTLY_INDUCED_BY_EGF            | -1.4031552 | 0.16961573 |
| BREDEMEYER_RAG_SIGNALING_NOT_VIA_ATM_DN             | -1.4030446 | 0.16958867 |
| KYNG_ENVIRONMENTAL_STRESS_RESPONSE_NOT_BY_UV_IN_OLD | -1.402962  | 0.16952722 |
| CHANG_IMMORTALIZED_BY_HPV31_UP                      | -1.4019295 | 0.17052956 |
| BIOCARTA_CTCF_PATHWAY                               | -1.401249  | 0.17110136 |
| CHYLA_CBFA2T3_TARGETS_UP                            | -1.4012146 | 0.1709888  |
| ROSS_LEUKEMIA_WITH_MLL_FUSIONS                      | -1.40111   | 0.17095082 |
| BROWNE_HCMV_INFECTION_1HR_UP                        | -1.4008497 | 0.17108352 |
| STAEGE_EWING_FAMILY_TUMOR                           | -1.4004539 | 0.17136478 |
| SARTIPY_NORMAL_AT_INSULIN_RESISTANCE_DN             | -1.4001664 | 0.17150335 |
| WOOD_EBV_EBNA1_TARGETS_UP                           | -1.3998629 | 0.17170477 |
| REACTOME_DOWNSTREAM_SIGNALING_OF_ACTIVATED_FGFR     | -1.3995202 | 0.17195585 |
| REACTOME_L1CAM_INTERACTIONS                         | -1.3993899 | 0.17195685 |
| BOQUEST_STEM_CELL_CULTURED_VS_FRESH_DN              | -1.3987045 | 0.17255257 |
| LENAOUR_DENDRITIC_CELL_MATURATION_DN                | -1.3984025 | 0.17272677 |
| FONTAINE_FOLLICULAR_THYROID_ADENOMA_DN              | -1.3983916 | 0.1725862  |
| REACTOME_ACTIVATED_POINT_MUTANTS_OF_FGFR2           | -1.3981382 | 0.17272395 |

|                                                         |            |            |
|---------------------------------------------------------|------------|------------|
| MCCLUNG_COCAIN_REWARD_4WK                               | -1.3976233 | 0.17314658 |
| PLASARI_TGFB1_TARGETS_10HR_DN                           | -1.3974445 | 0.1731912  |
| SASSON_RESPONSE_TO_FORSKOLIN_DN                         | -1.3963933 | 0.17423825 |
| BIOCARTA_INFLAM_PATHWAY                                 | -1.396098  | 0.17447037 |
| HERNANDEZ_ABERRANT_MITOSIS_BY_DOCETACEL_2NM_DN          | -1.3960775 | 0.1743391  |
| ROSS_ACUTE_MYELOID_LEUKEMIA_CBF                         | -1.3954751 | 0.17488578 |
| CHIANG_LIVER_CANCER_SUBCLASS_INTERFERON_DN              | -1.3948077 | 0.17546804 |
| LINDVALL_IMMORTALIZED_BY_TERT_UP                        | -1.3946352 | 0.1755032  |
| HEIDENBLAD_AMPLICON_12P11_12_UP                         | -1.3944592 | 0.17553696 |
| GENTILE_UV_RESPONSE_CLUSTER_D9                          | -1.3942636 | 0.17561156 |
| VALK_AML_CLUSTER_4                                      | -1.3940992 | 0.17566128 |
| ALCALAY_AML_BY_NPM1_LOCALIZATION_UP                     | -1.3939354 | 0.17568949 |
| NAKAMURA_METASTASIS                                     | -1.3937901 | 0.1756925  |
| SUZUKI_RESPONSE_TO_TSA                                  | -1.393544  | 0.1757928  |
| ONDER_CDH1_TARGETS_3_UP                                 | -1.3931917 | 0.17604993 |
| KAYO_CALORIE_RESTRICTION_MUSCLE_DN                      | -1.3931241 | 0.17596595 |
| PHONG_TNF_RESPONSE_VIA_P38_COMPLETE                     | -1.3929118 | 0.17603573 |
| DURCHDEWALD_SKIN_CARCINOGENESIS_UP                      | -1.3928599 | 0.17595026 |
| PARK_APL_PATHOGENESIS_DN                                | -1.3927951 | 0.17587997 |
| REACTOME_GABA_B_RECEPTOR_ACTIVATION                     | -1.3925953 | 0.17597036 |
| ANASTASSIOU_CANCER_MESENCHYMAL_TRANSITION_SIGNATURE     | -1.3924637 | 0.17595965 |
| PID_AVB3_INTEGRIN_PATHWAY                               | -1.3924028 | 0.17585522 |
| KOKKINAKIS_METHIONINE_DEPRIVATION_48HR_UP               | -1.3922628 | 0.17586976 |
| ST_G_ALPHA_5_PATHWAY                                    | -1.3920563 | 0.17594516 |
| RODRIGUES_THYROID_CARCINOMA_ANAPLASTIC_DN               | -1.3919728 | 0.17588276 |
| BRUNO_HEMATOPOIESIS                                     | -1.3915962 | 0.1761747  |
| KEGG_TASTE_TRANSDUCTION                                 | -1.3913974 | 0.17624964 |
| DAWSON_METHYLATED_IN_LYMPHOMA_TCL1                      | -1.3913394 | 0.17615752 |
| REACTOME_IL1_SIGNALING                                  | -1.3902285 | 0.17721763 |
| ASTON_MAJOR_DEPRESSIVE_DISORDER_UP                      | -1.3899046 | 0.17739832 |
| BILANGES_SERUM_SENSITIVE_GENES                          | -1.389648  | 0.17753865 |
| MEISSNER_NPC_HCP_WITH_H3K4ME2_AND_H3K27ME3              | -1.389236  | 0.1778302  |
| CHIBA_RESPONSE_TO_TSA_DN                                | -1.3887241 | 0.17823243 |
| PID_VEGFR1_2_PATHWAY                                    | -1.3886561 | 0.17815584 |
| ZEMBUTSU_SENSITIVITY_TO_CYCLOPHOSPHAMIDE                | -1.3886187 | 0.17804202 |
| DUTERTRE ESTRADIOL_RESPONSE_24HR_DN                     | -1.388315  | 0.17822392 |
| BIOCARTA_NTHI_PATHWAY                                   | -1.3881023 | 0.17831455 |
| REACTOME_XENOBIOTICS                                    | -1.3878596 | 0.17843911 |
| SMID_BREAST_CANCER_RELAPSE_IN_LUNG_DN                   | -1.3873836 | 0.17877981 |
| MCMURRAY_TP53_HRAS_COOPERATION_RESPONSE_UP              | -1.3872317 | 0.17880106 |
| REACTOME_DOWNSTREAM_SIGNAL_TRANSDUCTION                 | -1.3870642 | 0.1787981  |
| SCHLINGEMANN_SKIN_CARCINOGENESIS_TPA_DN                 | -1.3867714 | 0.17899464 |
| HADDAD_T_LYMPHOCYTE_AND_NK_PROGENITOR_UP                | -1.3867239 | 0.17889455 |
| HELLER_SILENCED_BY_METHYLATION_DN                       | -1.3864338 | 0.17905249 |
| AZARE_STAT3_TARGETS                                     | -1.3863946 | 0.17892973 |
| HINATA_NFKB_TARGETS_KERATINOCYTE_UP                     | -1.3861117 | 0.17910329 |
| BIOCARTA_CALCINEURIN_PATHWAY                            | -1.3851658 | 0.18002279 |
| REACTOME_OLFACTORY_SIGNALING_PATHWAY                    | -1.385163  | 0.17987356 |
| VERHAAK_GLIOMASTOMA_CLASSICAL                           | -1.3847058 | 0.18024503 |
| ICHIBA_GRAFT_VERSUS_HOST_DISEASE_D7_DN                  | -1.3840088 | 0.18090726 |
| TIEN_INTESTINE_PROBIOTICS_24HR_DN                       | -1.3836627 | 0.18113677 |
| WARTERS_IR_RESPONSE_5GY                                 | -1.3835427 | 0.18113576 |
| WATANABE_RECTAL_CANCER_RADIOOTHERAPY_RESPONSIVE_DN      | -1.3826168 | 0.18202417 |
| REACTOME_GLUCAGON_SIGNALING_IN_METABOLIC_REGULATION     | -1.3816509 | 0.18297207 |
| KEGG_BETA_ALANINE_METABOLISM                            | -1.3804781 | 0.18416843 |
| PEDERSEN_METASTASIS_BY_ERBB2_ISOFORM_4                  | -1.380285  | 0.18423116 |
| VALK_AML_WITH_FLT3_ITD                                  | -1.3800315 | 0.18434267 |
| REACTOME_CELL_SURFACE_INTERACTIONS_AT_THE_VASCULAR_WALL | -1.3795623 | 0.18472189 |
| KANNAN_TP53_TARGETS_UP                                  | -1.3794354 | 0.1846986  |
| LABBE_TARGETS_OF_TGFB1_AND_WNT3A_DN                     | -1.3792115 | 0.18479288 |
| GARGALOVIC_RESPONSE_TO_OXIDIZED_PHOSPHOLIPIDS_BLUE_DN   | -1.3789463 | 0.1849414  |
| SEKI_INFLAMMATORY_RESPONSE_LPS_DN                       | -1.3788733 | 0.18487392 |
| DACOSTA_UV_RESPONSE_VIA_ERCC3_TTD_DN                    | -1.3783343 | 0.1853233  |
| CHESLER_BRAIN_HIGHEST_GENETIC_VARIANCE                  | -1.3778139 | 0.18578826 |
| MOOHA_PGC                                               | -1.3775271 | 0.18594553 |
| PLASARI_TGFB1_SIGNALING_VIA_NFIC_1HR_UP                 | -1.3771154 | 0.18629748 |
| REACTOME_SIGNALING_BY_FGFR_IN_DISEASE                   | -1.3769642 | 0.18630306 |
| GENTILE_UV_RESPONSE_CLUSTER_D8                          | -1.3767972 | 0.18632898 |
| REACTOME_HS_GAG_BIOSYNTHESIS                            | -1.3760908 | 0.18699346 |
| VALK_AML_CLUSTER_15                                     | -1.3756231 | 0.18733422 |
| PLASARI_TGFB1_SIGNALING_VIA_NFIC_10HR_DN                | -1.3744233 | 0.18852891 |
| KEGG_OLFACTORY_TRANSDUCTION                             | -1.3743771 | 0.18842591 |
| HAHTOLA_CTCL_CUTANEOUS                                  | -1.3736227 | 0.18909031 |
| IVANOVA_HEMATOPOIESIS_STEM_CELL_LONG_TERM               | -1.3733431 | 0.18922462 |
| OHGUCHI_LIVER_HNF4A_TARGETS_UP                          | -1.3729073 | 0.18952571 |
| PID_TCPTP_PATHWAY                                       | -1.37276   | 0.18956193 |
| MATSUDA_NATURAL_KILLER_DIFFERENTIATION                  | -1.3726797 | 0.18949644 |
| XU_HGF_TARGETS_REPRESSED_BY_AKT1_DN                     | -1.3724469 | 0.18961117 |
| NATSUME_RESPONSE_TO_INTERFERON_BETA_DN                  | -1.3724085 | 0.18949464 |
| PID_RAS_PATHWAY                                         | -1.3723229 | 0.1894143  |

|                                                                   |            |            |
|-------------------------------------------------------------------|------------|------------|
| REACTOME_NGF_SIGNALLING_VIA_TRKA_FROM_THE_PLASMA_MEMBRANE         | -1.3723123 | 0.1892678  |
| PID_LYMPH_ANGIOGENESIS_PATHWAY                                    | -1.3719326 | 0.18952735 |
| REACTOME_GLUCCONEOGENESIS                                         | -1.3703494 | 0.19117194 |
| YIH_RESPONSE_TO_ARSENITE_C4                                       | -1.3701584 | 0.19123518 |
| WANG_RESPONSE_TO_BEXAROTENE_DN                                    | -1.3697001 | 0.19160622 |
| HASLINGER_B_CLL_WITH_11Q23_DELETION                               | -1.3696449 | 0.19150169 |
| AMIT_EGF_RESPONSE_480_HELA                                        | -1.3696419 | 0.19134845 |
| HAHTOLA_MYCOSIS_FUNGICIDES_SKIN_UP                                | -1.3692942 | 0.19156866 |
| SCIAN_INVERSED_TARGETS_OF_TP53_AND_TP73_DN                        | -1.3687253 | 0.19209829 |
| HUTTMANN_B_CLL_POOR_SURVIVAL_UP                                   | -1.367789  | 0.19304988 |
| LEIN_OLIGODENDROCYTE_MARKERS                                      | -1.367719  | 0.19297113 |
| PEPPER_CHRONIC_LYMPHOCYTIC_LEUKEMIA_DN                            | -1.3675385 | 0.1930511  |
| RIGGINS_TAMOXIFEN_RESISTANCE_UP                                   | -1.3672411 | 0.19323663 |
| MITSIADES_RESPONSE_TO_APLIDIN_UP                                  | -1.3671799 | 0.19315746 |
| WANG_LSD1_TARGETS_UP                                              | -1.3669974 | 0.19321415 |
| VANDESLUIS_COMMD1_TARGETS_GROUP_4_UP                              | -1.3669227 | 0.19316304 |
| HOWLIN_CITED1_TARGETS_1_UP                                        | -1.3667961 | 0.19316971 |
| SHI_SPARC_TARGETS_UP                                              | -1.3665519 | 0.1933065  |
| GRAESSMANN_APOPTOSIS_BY_SERUM_DEPRIVATION_UP                      | -1.3663617 | 0.19339989 |
| LEE_AGING_NEOCORTEX_DN                                            | -1.3662393 | 0.19338924 |
| TONKS_TARGETS_OF_RUNX1_RUNX1T1_FUSION_MONOCYTE_UP                 | -1.3660772 | 0.1934055  |
| HEDENFALK_BREAST_CANCER_BRACX_UP                                  | -1.3655478 | 0.19392419 |
| STAMBOLSKY_TARGETS_OF_MUTATED_TP53_UP                             | -1.3650961 | 0.19429922 |
| REACTOME_NETRIN1_SIGNALING                                        | -1.3646866 | 0.19465089 |
| KEGG_EPITHELIAL_CELL_SIGNALING_IN_HELICOBACTER_PYLORI_INFECTION   | -1.3643085 | 0.19496079 |
| KUUSELO_PANCREATIC_CANCER_19Q13_AMPLIFICATION                     | -1.3642957 | 0.1948154  |
| SCHURINGA_STATS5A_TARGETS_DN                                      | -1.3640851 | 0.19489668 |
| RIZ_ERYTHROID_DIFFERENTIATION_12HR                                | -1.3639913 | 0.1948445  |
| DARWICHE_SKIN_TUMOR_PROMOTER_UP                                   | -1.3637171 | 0.19502257 |
| KEGG_TOLL_LIKE_RECEPTOR_SIGNALING_PATHWAY                         | -1.3632171 | 0.19540821 |
| JIANG_AGING_HYPOTHALAMUS_UP                                       | -1.3630841 | 0.19536702 |
| REACTOME_MYOGENESIS                                               | -1.3625082 | 0.19588667 |
| CHANGOLKAR_H2AFY_TARGETS_DN                                       | -1.3623432 | 0.19591887 |
| TING_SILENCED_BY_DICER                                            | -1.3621002 | 0.19602188 |
| GARGALOVIC_RESPONSE_TO_OXIDIZED_PHOSPHOLIPIDS_BLACK_UP            | -1.3617909 | 0.19619788 |
| BOGNI_TREATMENT_RELATED_MYELOID_LEUKEMIA_UP                       | -1.3617759 | 0.19605106 |
| CHIANG_LIVER_CANCER_SUBCLASS_POLYSOMY7_DN                         | -1.3614054 | 0.19635585 |
| GRANDVAUX_IRF3_TARGETS_DN                                         | -1.3609058 | 0.19678034 |
| GRAHAM_CML_QUIESCENT_VS_CML_DIVIDING_UP                           | -1.3608683 | 0.19666046 |
| BOYLAN_MULTIPLE_MYELOMA_C_UP                                      | -1.3606502 | 0.19678813 |
| REACTOME_GAP_JUNCTION_TRAFFICKING                                 | -1.3605211 | 0.19679001 |
| BOCHKIS_FOXA2_TARGETS                                             | -1.359664  | 0.19764882 |
| SMID_BREAST_CANCER_NORMAL_LIKE_UP                                 | -1.3595451 | 0.19763121 |
| CHIARETTI_T_ALL_REFRACTORY_TO_THERAPY                             | -1.35934   | 0.1977056  |
| SWEET_KRAS_TARGETS_DN                                             | -1.3590107 | 0.19792552 |
| DAIRKEE_TERT_TARGETS_DN                                           | -1.3588277 | 0.19796415 |
| WIERENGA_STATS5A_TARGETS_DN                                       | -1.358408  | 0.19833098 |
| SARRIO_EPITHELIAL_MESENCHYMAL_TRANSITION_DN                       | -1.3577033 | 0.19902256 |
| LIU_SOX4_TARGETS_UP                                               | -1.3575089 | 0.19910502 |
| TAKADA_GASTRIC_CANCER_COPY_NUMBER_DN                              | -1.3573424 | 0.1991329  |
| PEDERSEN_METASTASIS_BY_ERBB2_ISOFORM_3                            | -1.3572711 | 0.19905877 |
| RAO_BOUND_BY_SALL4                                                | -1.356338  | 0.20006737 |
| SENESE_HDAC2_TARGETS_UP                                           | -1.3562243 | 0.20006233 |
| CHIANG_LIVER_CANCER_SUBCLASS_INTERFERON_UP                        | -1.355912  | 0.2002516  |
| MIKKELSEN_ES_ICP_WITH_H3K27ME3                                    | -1.3558894 | 0.20011967 |
| REACTOME_HS_GAG_DEGRADATION                                       | -1.355663  | 0.2002244  |
| DORN_ADENOVIRUS_INFECTION_32HR_DN                                 | -1.3555026 | 0.20025271 |
| REACTOME_SIGNAL_TRANSDUCTION_BY_L1                                | -1.3547773 | 0.20092838 |
| RICKMAN_TUMOR_DIFFERENTIATED_MODERATELY_VS_POORLY_UP              | -1.354714  | 0.20083104 |
| GENTILE_UV_HIGH_DOSE_DN                                           | -1.3546944 | 0.20069192 |
| SMIRNOV_RESPONSE_TO_IR_2HR_UP                                     | -1.3538535 | 0.2014843  |
| STOSSI_RESPONSE_TO ESTRADIOL                                      | -1.353587  | 0.20161524 |
| REACTOME_ACTIVATED_AMPK_STIMULATES_FATTY_ACID_OXIDATION_IN_MUSCLE | -1.3533121 | 0.20177782 |
| VALK_AML_WITH_CEBPA                                               | -1.3530618 | 0.20191766 |
| APPEL_IMATINIB_RESPONSE                                           | -1.3525485 | 0.2024126  |
| MILI_PSEUDOPODIA_CHEMOTAXIS_UP                                    | -1.3523691 | 0.20247827 |
| AKL_HTLV1_INFECTION_UP                                            | -1.3515081 | 0.20333773 |
| REACTOME KERATAN_SULFATE KERATIN METABOLISM                       | -1.3513181 | 0.20338447 |
| BORLAK_LIVER_CANCER_EGF_UP                                        | -1.3511161 | 0.20344482 |
| REACTOME_G_ALPHA1213_SIGNALING_EVENTS                             | -1.3508296 | 0.20359482 |
| PID_RET_PATHWAY                                                   | -1.3505157 | 0.20382316 |
| J1_CARCINOGENESIS_BY_KRAS_AND_STK11_DN                            | -1.3502953 | 0.20390062 |
| PID_REELIN_PATHWAY                                                | -1.3502814 | 0.2037544  |
| KRIGE_AMINO_ACID_DEPRIVATION                                      | -1.3481061 | 0.20615497 |
| YAO_TEMPORAL_RESPONSE_TO_PROGESTERONE_CLUSTER_4                   | -1.3477514 | 0.20641148 |
| REACTOME_ACTIVATION_OF_KAINATE_RECEPTORS_UPON GLUTAMATE_BINDING   | -1.3471773 | 0.2069271  |
| KEGG_HISTIDINE_METABOLISM                                         | -1.3469111 | 0.20706311 |
| RASHI_RESPONSE_TO_IONIZING_RADIATION_5                            | -1.3466265 | 0.20727755 |
| LU_TUMOR_ENDOTHELIAL_MARKERS_UP                                   | -1.3461902 | 0.2076353  |
| KUMAR_AUTOPHAGY_NETWORK                                           | -1.3460864 | 0.20758983 |

|                                                                     |            |            |
|---------------------------------------------------------------------|------------|------------|
| AMUNDSON_GAMMA_RADIATION_RESISTANCE                                 | -1.3457648 | 0.20780455 |
| BOYVAULT_LIVER_CANCER_SUBCLASS_G1_DN                                | -1.3457618 | 0.20764492 |
| GRADE_COLON_VS_RECTAL_CANCER_DN                                     | -1.3453717 | 0.20793733 |
| CHEOK_RESPONSE_TO_HD_MTX_UP                                         | -1.3453313 | 0.20781913 |
| AZARE_NEOPLASTIC_TRANSFORMATION_BY_STAT3_DN                         | -1.345189  | 0.20784171 |
| GRAHAM_CML_DIVIDING_VS_NORMAL_QUIESCENT_DN                          | -1.3446152 | 0.20835237 |
| LIAN_LIPA_TARGETS_6M                                                | -1.344141  | 0.20875607 |
| BIOCARTA_EIF4_PATHWAY                                               | -1.3440282 | 0.20874012 |
| REACTOME_ABCA_TRANSPORTERS_IN_LIPID_HOMEOSTASIS                     | -1.3440089 | 0.20860156 |
| REACTOME_VOLTAGE_GATED_POTASSIUM_CHANNELS                           | -1.343983  | 0.20847672 |
| BANDRES_RESPONSE_TO_CARMUSTIN_MGMT_48HR_DN                          | -1.343881  | 0.20843819 |
| FONTAINE_PAPILLARY_THYROID_CARCINOMA_DN                             | -1.3432288 | 0.20911874 |
| REACTOME_G_PROTEIN_BETA_GAMMA_SIGNALLING                            | -1.3430651 | 0.20917371 |
| AMUNDSON_RESPONSE_TO_ARSENITE                                       | -1.3425211 | 0.20964569 |
| KYNG_DNA_DAMAGE_BY_GAMMA_AND_UV_RADIATION                           | -1.3421737 | 0.20984969 |
| IWANAGA_CARCINOGENESIS_BY_KRAS_DN                                   | -1.3414949 | 0.21049573 |
| CASORELLI_APL_SECONDARY_VS_DE_NOVO_UP                               | -1.3414919 | 0.2103362  |
| YAO_TEMPORAL_RESPONSE_TO_PROGESTERONE_CLUSTER_11                    | -1.3409799 | 0.210792   |
| MEISSNER_BRAIN_HCP_WITH_H3K27ME3                                    | -1.3409512 | 0.21066052 |
| TERAMOTO_OPN_TARGETS_CLUSTER_7                                      | -1.3408784 | 0.21058263 |
| GEISS_RESPONSE_TO_DSRNA_UP                                          | -1.3406576 | 0.21068096 |
| REACTOME_PL3_BETA_MEDIATED_EVENTS                                   | -1.340413  | 0.21082276 |
| MATZUK_SPERMATOGONIA                                                | -1.3401171 | 0.21104212 |
| LOPEZ_MBD_TARGETS_IMPRINTED_AND_X_LINKED                            | -1.3399012 | 0.2111614  |
| KANG_CISPLATIN_RESISTANCE_UP                                        | -1.3396208 | 0.2113458  |
| PUIFFE_INVASION_INHIBITED_BY_ASCITES_UP                             | -1.3394499 | 0.2113786  |
| MORI_SMALL_PRE_BII_LYMPHOCYTE_UP                                    | -1.3390361 | 0.21171468 |
| REACTOME_REGULATION_OF_WATER_BALANCE_BY_RENAL_AQUAPORINS            | -1.33899   | 0.21160954 |
| REACTOME_ACYL_CHAIN_REMODELLING_OF_PE                               | -1.3386161 | 0.21189013 |
| WANG_SMARCE1_TARGETS_DN                                             | -1.338436  | 0.21192281 |
| KEGG_ALDOSTERONE_REGULATED_SODIUM_REABSORPTION                      | -1.3381842 | 0.21207313 |
| TAVOR_CEBPA_TARGETS_DN                                              | -1.3381548 | 0.2119467  |
| PID_EPHB_FWD_PATHWAY                                                | -1.3380287 | 0.21192111 |
| LIU_BREAST_CANCER                                                   | -1.3380207 | 0.21177137 |
| REACTOME_FGFR_LIGAND_BINDING_AND_ACTIVATION                         | -1.337951  | 0.21168949 |
| TIEN_INTESTINE_PROBIOTICS_2HR_DN                                    | -1.3373536 | 0.21222867 |
| KEGG_DORSO_VENTRAL_AXIS_FORMATION                                   | -1.3371446 | 0.2123182  |
| AKL_HTLV1_INFECTION_DN                                              | -1.3370148 | 0.21230589 |
| MOHANKUMAR_TLX1_TARGETS_DN                                          | -1.3367912 | 0.21239795 |
| DUAN_PRDM5_TARGETS                                                  | -1.336482  | 0.21264498 |
| GARGALOVIC_RESPONSE_TO_OXIDIZED_PHOSPHOLIPIDS_YELLOW_UP             | -1.3362609 | 0.21272065 |
| VERRECCHIA_RESPONSE_TO_TGFB1_C2                                     | -1.3357162 | 0.21319038 |
| FORTSCHEGGER_PHF8_TARGETS_UP                                        | -1.3355371 | 0.21323042 |
| MATZUK_IMPLANTATION_AND_UTERINE                                     | -1.3355082 | 0.2130977  |
| TURASHVILI_BREAST_DUCTAL_CARCINOMA_VS_DUCTAL_NORMAL_DN              | -1.3353249 | 0.21315326 |
| SERVITJA_LIVER_HNF1A_TARGETS_DN                                     | -1.3350044 | 0.21337186 |
| MAHADEVAN_IMATINIB_RESISTANCE_UP                                    | -1.3348855 | 0.21336044 |
| TURASHVILI_BREAST_DUCTAL_CARCINOMA_VS_LOBULAR_NORMAL_DN             | -1.3342972 | 0.21389827 |
| ACEVEDO_NORMAL_TISSUE_ADJACENT_TO_LIVER_TUMOR_UP                    | -1.334297  | 0.21373709 |
| BORCZUK_MALIGNANT_MESOTHELIOMA_DN                                   | -1.3340212 | 0.21391489 |
| REACTOME_GLYCEROPHOSPHOLIPID_BIOSYNTHESIS                           | -1.3336359 | 0.21424821 |
| LEE_NEURAL_CREST_STEM_CELL_DN                                       | -1.3335488 | 0.21419346 |
| LEE_CALORIE_RESTRICTION_NEOCORTEX_UP                                | -1.3322108 | 0.21556632 |
| ZHAN_MULTIPLE_MYELOMA_MS_UP                                         | -1.3319659 | 0.21568733 |
| REACTOME_SIGNALING_BY_EGFR_IN_CANCER                                | -1.3310401 | 0.21660808 |
| DAVIES_MULTIPLE_MYELOMA_VS_MGUS_DN                                  | -1.3306719 | 0.21690826 |
| DURCHDEWALD_SKIN_CARCINOGENESIS_DN                                  | -1.3298855 | 0.21765743 |
| FUJII_YBX1_TARGETS_UP                                               | -1.3296869 | 0.21773195 |
| FARMER_BREAST_CANCER_CLUSTER_4                                      | -1.3296863 | 0.21757378 |
| BONCI_TARGETS_OF_MIR15A_AND_MIR16_1                                 | -1.3288838 | 0.21835893 |
| KANG_DOXORUBICIN_RESISTANCE_DN                                      | -1.3287225 | 0.21838428 |
| GEORGANTAS_HSC_MARKERS                                              | -1.328647  | 0.2183191  |
| SINGH_NFE2L2_TARGETS                                                | -1.328612  | 0.21818677 |
| RUTELLA_RESPONSE_TO_HGF_UP                                          | -1.3284137 | 0.2182596  |
| LEE_LIVER_CANCER_MYC_TGFA_UP                                        | -1.3283399 | 0.21820395 |
| REACTOME_PI_3K_CASCADE                                              | -1.3280079 | 0.21847363 |
| REACTOME_GRB2_SOS_PROVIDES_LINKAGE_TO_MAPK_SIGNALING_FOR_INTERGRINS | -1.3279189 | 0.21842209 |
| HALMOS_CEBPA_TARGETS_DN                                             | -1.326218  | 0.2204482  |
| BIOCARTA_COMP_PATHWAY                                               | -1.3259828 | 0.22058165 |
| THEILGAARD_NEUTROPHIL_AT_SKIN_WOUND_UP                              | -1.3259369 | 0.22047132 |
| SMITH_TERT_TARGETS_UP                                               | -1.3258505 | 0.22041047 |
| KIM_PTEN_TARGETS_UP                                                 | -1.3257742 | 0.22031818 |
| MCBRYAN_PUBERTAL_BREAST_5_GWK_UP                                    | -1.3250493 | 0.22104678 |
| SETLUR_PROSTATE_CANCER_TMPRSS2_ERG_FUSION_DN                        | -1.3248044 | 0.22118169 |
| ZWANG_EGF_INTERVAL_UP                                               | -1.3245158 | 0.22137119 |
| SERVITJA_LIVER_HNF1A_TARGETS_UP                                     | -1.3240585 | 0.22179613 |
| JAZAG_TGFB1_SIGNALING_VIA_SMAD4_DN                                  | -1.3238763 | 0.22187889 |
| WILLERT_WNT_SIGNALING                                               | -1.3235517 | 0.22211917 |
| CASORELLI_ACUTE_PROMYELOCYTIC_LEUKEMIA_UP                           | -1.3234329 | 0.22209933 |
| KAMIKUBO_MYELOID_CEBPA_NETWORK                                      | -1.3229792 | 0.22248547 |

|                                                                                                 |            |            |
|-------------------------------------------------------------------------------------------------|------------|------------|
| APPIERTO_RESPONSE_TO_FENRETINIDE_UP                                                             | -1.3229461 | 0.2223586  |
| PID_NETRIN_PATHWAY                                                                              | -1.3225669 | 0.22266477 |
| CHEN_PDGF_TARGETS                                                                               | -1.3222686 | 0.22289038 |
| BIOCARTA_EPO_PATHWAY                                                                            | -1.3220693 | 0.22296317 |
| HERNANDEZ_ABERRANT_MITOSIS_BY_DOCETACEL_4NM_UP                                                  | -1.3216938 | 0.22329953 |
| BIOCARTA_CREB_PATHWAY                                                                           | -1.321561  | 0.22330208 |
| RICKMAN_HEAD_AND_NECK_CANCER_E                                                                  | -1.3215299 | 0.22318375 |
| SIG_REGULATION_OF_THE_ACTIN_CYTOSKELETON_BY_RHO_GTPASES                                         | -1.3213108 | 0.2233081  |
| ZHAN_MULTIPLE_MYELOMA_CD1_UP                                                                    | -1.3211521 | 0.22331925 |
| BRUECKNER_TARGETS_OF_MIRLET7A3_UP                                                               | -1.3208811 | 0.2234699  |
| MARZEC_IL2_SIGNALING_DN                                                                         | -1.320496  | 0.22375026 |
| PID_HEDGEHOG_2PATHWAY                                                                           | -1.3203204 | 0.22378956 |
| BOYLAN_MULTIPLE_MYELOMA_PCA3_DN                                                                 | -1.3202214 | 0.22373912 |
| RADMACHER_AML_PROGNOSIS                                                                         | -1.3186901 | 0.22547364 |
| RODRIGUES_THYROID_CARCINOMA_DN                                                                  | -1.3184189 | 0.22562726 |
| REACTOME_UNFOLDED_PROTEIN_RESPONSE                                                              | -1.317732  | 0.22626394 |
| KYNG_ENVIRONMENTAL_STRESS_RESPONSE_NOT_BY_GAMMA_IN_OLD                                          | -1.3171866 | 0.22678915 |
| ASTON_MAJOR_DEPRESSIVE_DISORDER_DN                                                              | -1.3171359 | 0.22669478 |
| ABBUD_LIF_SIGNALING_1_DN                                                                        | -1.3171052 | 0.22656114 |
| GNATENKO_PLATELET_SIGNATURE                                                                     | -1.3170286 | 0.2264875  |
| MCCLUNG_CREB1_TARGETS_DN                                                                        | -1.3168881 | 0.22650886 |
| JAATINEN_HEMATOPOIETIC_STEM_CELL_UP                                                             | -1.3166705 | 0.22662127 |
| VERHAAK_GLIOMASTOMA_NEURAL                                                                      | -1.3166308 | 0.22649476 |
| REACTOME_INHIBITION_OF_VOLTAGE_GATED_CA2_CHANNELS_VIA_GBETA_GAMMA_SUBUNITS                      | -1.3163304 | 0.22669962 |
| KEGG_ARRHYTHMOGENIC_RIGHT_VENTRICULAR_CARDIOMYOPATHY_ARVC                                       | -1.3163092 | 0.22656891 |
| NADLER_OBESITY_UP                                                                               | -1.316251  | 0.22648111 |
| GRUETZMANN_PANCREATIC_CANCER_UP                                                                 | -1.3159802 | 0.22664689 |
| AMUNDSON_POOR_SURVIVAL_AFTER_GAMMA_RADIATION_8G                                                 | -1.3156598 | 0.22688895 |
| ASGHARZADEH_NEUROBLASTOMA_POOR_SURVIVAL_DN                                                      | -1.31551   | 0.22691219 |
| TSUNODA_CISPLATIN_RESISTANCE_DN                                                                 | -1.3152449 | 0.22705252 |
| MCMURRAY_TP53_HRAS_COOPERATION_RESPONSE_DN                                                      | -1.3151859 | 0.22695172 |
| PID_MYC_REPRESS_PATHWAY                                                                         | -1.3151313 | 0.22686732 |
| MIKKELSEN_NPC_ICP_WITH_H3K4ME3                                                                  | -1.3143659 | 0.22759156 |
| NAKAMURA_METASTASIS_MODEL_DN                                                                    | -1.3142943 | 0.22751711 |
| FOSTER_KDM1A_TARGETS_UP                                                                         | -1.3137548 | 0.22799163 |
| GAVIN_FOXP3_TARGETS_CLUSTER_P3                                                                  | -1.313456  | 0.22823147 |
| POMEROY_MEDULLOBLASTOMA_DESMOPLASIC_VS_CLASSIC_UP                                               | -1.3129873 | 0.22864248 |
| KIM_WT1_TARGETS_12HR_DN                                                                         | -1.3128614 | 0.22862041 |
| LUI_THYROID_CANCER_CLUSTER_1                                                                    | -1.312837  | 0.22848466 |
| REACTOME_STRIATED_MUSCLE_CONTRACTION                                                            | -1.31199   | 0.22936922 |
| GAVIN_FOXP3_TARGETS_CLUSTER_P7                                                                  | -1.3115641 | 0.22970699 |
| NADLER_HYPERGLYCEMIA_AT_OBESITY                                                                 | -1.3113098 | 0.22982326 |
| KEGG_GLYOXYLATE_AND_DICARBOXYLATE_METABOLISM                                                    | -1.3109217 | 0.23010243 |
| ZHAN_LATE_DIFFERENTIATION_GENES_UP                                                              | -1.310622  | 0.23030892 |
| KEGG_GLYCOSAMINOGLYCAN_DEGRADATION                                                              | -1.3105801 | 0.23019129 |
| REACTOME_G_BETA_GAMMA_SIGNALING_THROUGH_PI3KGAMMA                                               | -1.3105608 | 0.23005442 |
| TIEN_INTESTINE_PROBIOTICS_6HR_DN                                                                | -1.3103634 | 0.23013721 |
| HE_PTEN_TARGETS_UP                                                                              | -1.3102853 | 0.23007168 |
| REACTOME_TRANSMISSION_ACROSS_CHEMICAL_SYNAPSES                                                  | -1.3097765 | 0.23051803 |
| HAN_JNK_SIGNALING_UP                                                                            | -1.309641  | 0.23052242 |
| HUPER_BREAST_BASAL_VS_LUMINAL_UP                                                                | -1.3088441 | 0.23133284 |
| ZHAN_MULTIPLE_MYELOMA_CD1_VS_CD2_UP                                                             | -1.3087999 | 0.23123369 |
| MIKKELSEN_MEF_ICP_WITH_H3K27ME3                                                                 | -1.3085188 | 0.23142573 |
| REACTOME_NEUROTRANSMITTER_RECEPTOR_BINDING_AND_DOWNSTREAM_TRANSMISSION_IN_THE_POSTSYNAPTIC_CELL | -1.3084309 | 0.23136328 |
| NAKAYAMA_SOFT_TISSUE_TUMORS_PCA1_UP                                                             | -1.3081546 | 0.23155956 |
| NIKOLSKY_BREAST_CANCER_15Q26_AMPLICON                                                           | -1.3076457 | 0.23207119 |
| TONKS_TARGETS_OF_RUNX1_RUNX1T1_FUSION_SUSTAINED_IN GRANULOCYTE_UP                               | -1.3075367 | 0.2320415  |
| ROYLANCE_BREAST_CANCER_16Q_COPY_NUMBER_DN                                                       | -1.3075219 | 0.23189573 |
| ALTEMEIER_RESPONSE_TO_LPS_WITH_MECHANICAL_VENTILATION                                           | -1.307034  | 0.23233743 |
| DAZARD_UV_RESPONSE_CLUSTER_G4                                                                   | -1.3066152 | 0.2327258  |
| ALONSO_METASTASIS_NEURAL_UP                                                                     | -1.3063391 | 0.23290665 |
| YAO_TEMPORAL_RESPONSE_TO_PROGESTERONE_CLUSTER_6                                                 | -1.3057793 | 0.23347725 |
| GHO_ATF5_TARGETS_DN                                                                             | -1.3057628 | 0.23333484 |
| ACEVEDO_LIVER_CANCER_WITH_H3K9ME3_UP                                                            | -1.3053129 | 0.23374465 |
| MURAKAMI_UV_RESPONSE_6HR_DN                                                                     | -1.3052497 | 0.2336724  |
| MIKKELSEN_ES_ICP_WITH_H3K4ME3_AND_H3K27ME3                                                      | -1.3051647 | 0.2336028  |
| MOOTHA_FFA_OXYDATION                                                                            | -1.3046696 | 0.23401436 |
| REACTOME_DAG_AND_IP3_SIGNALING                                                                  | -1.303871  | 0.23485678 |
| BANDRES_RESPONSE_TO_CARMUSTIN_WITHOUT_MGMT_48HR_UP                                              | -1.3034456 | 0.23519771 |
| DAVICIONI_TARGETS_OF_PAX_FOXO1_FUSIONS_DN                                                       | -1.3032143 | 0.23532465 |
| WEIGEL_OXIDATIVE_STRESS_BY_HNE_AND_TBH                                                          | -1.3030412 | 0.23535934 |
| PID_FCR1_PATHWAY                                                                                | -1.3028296 | 0.23543668 |
| SENESE_HDAC1_TARGETS_UP                                                                         | -1.3021182 | 0.23608571 |
| STEARMAN_LUNG_CANCER_EARLY_VS_LATE_UP                                                           | -1.3018095 | 0.23628108 |
| REACTOME_DARPP_32_EVENTS                                                                        | -1.3018003 | 0.2361261  |
| REACTOME_KERATAN_SULFATE_BIOSYNTHESIS                                                           | -1.3014498 | 0.23640169 |
| WANG_BARRETTES_ESOPHAGUS_AND_ESOPHAGUS_CANCER_UP                                                | -1.301192  | 0.23655757 |
| DARWICHE_SQUAMOUS_CELL_CARCINOMA_DN                                                             | -1.3010303 | 0.23658502 |
| WANG_ESOPHAGUS_CANCER_VS_NORMAL_UP                                                              | -1.3009374 | 0.23654024 |
| BOYLAN_MULTIPLE_MYELOMA_C_DN                                                                    | -1.3008882 | 0.2364233  |

|                                                                                |            |             |
|--------------------------------------------------------------------------------|------------|-------------|
| YAGI_AML_FAB_MARKERS                                                           | -1.3007    | 0.23651177  |
| WANG_PROSTATE_CANCER_ANDROGEN_INDEPENDENT                                      | -1.300024  | 0.23714437  |
| MIKKELSEN_MEF_HCP_WITH_H3K27ME3                                                | -1.299911  | 0.23712127  |
| HERNANDEZ_MITOTIC_ARREST_BY_DOCETAXEL_2_UP                                     | -1.2998585 | 0.23701803  |
| BROWN_MYELOID_CELL_DEVELOPMENT_UP                                              | -1.2992525 | 0.23760308  |
| BILBAN_B_CLL_LPL_DN                                                            | -1.2991841 | 0.23750827  |
| YORDY_RECIPROCAL_REGULATION_BY_ETS1_AND_SP100_UP                               | -1.2989348 | 0.23763254  |
| SAMOLS_TARGETS_OF_KHSV_MIRNAS_DN                                               | -1.2984548 | 0.23808452  |
| PEREZ_TP63_TARGETS                                                             | -1.2979941 | 0.23845333  |
| FOSTER_TOLERANT_MACROPHAGE_DN                                                  | -1.2977133 | 0.23867881  |
| KEGG_FRUCTOSE_AND_MANNANOSE_METABOLISM                                         | -1.2973715 | 0.23894344  |
| LIN_MELANOMA_COPY_NUMBER_DN                                                    | -1.2963852 | 0.23995735  |
| SHETH_LIVER_CANCER_VS_TXNIP_LOSS_PAM3                                          | -1.2963226 | 0.23986472  |
| ZHAN_V1_LATE_DIFFERENTIATION_GENES_UP                                          | -1.2959096 | 0.24020785  |
| MCLACHLAN_DENTAL_CARIES_DN                                                     | -1.2957617 | 0.24022478  |
| DARWICHE_PAPILLOMA_RISK_LOW_DN                                                 | -1.2954679 | 0.2404276   |
| LABBE_WNT3A_TARGETS_UP                                                         | -1.2954651 | 0.24026538  |
| REACTOME_INNATE_IMMUNE_SYSTEM                                                  | -1.2953572 | 0.24024186  |
| MACLACHLAN_BRCA1_TARGETS_UP                                                    | -1.2951827 | 0.24031128  |
| BYSTRYKH_HEMATOPOIESIS_STEM_CELL_SCP2_QTL_TRANS                                | -1.2948468 | 0.24059865  |
| MEISSNER_NPC_HCP_WITH_H3K27ME3                                                 | -1.2948011 | 0.24049719  |
| BIOCARTA_VIP_PATHWAY                                                           | -1.2946234 | 0.24053578  |
| VERRECCHIA_DELAYED_RESPONSE_TO_TGFB1                                           | -1.293829  | 0.24135603  |
| BIOCARTA_PAR1_PATHWAY                                                          | -1.2938098 | 0.24121977  |
| TAKEDA_TARGETS_OF_NUP98_HOXA9_FUSION_8D_UP                                     | -1.293573  | 0.24138233  |
| KEEN_RESPONSE_TO_ROSIGLITAZONE_UP                                              | -1.2934204 | 0.24138358  |
| DE_YY1_TARGETS_DN                                                              | -1.2928343 | 0.24189611  |
| REACTOME_GROWTH_HORMONE_RECEPTOR_SIGNALING                                     | -1.292624  | 0.24199794  |
| REACTOME_SPHINGOLIPID_METABOLISM                                               | -1.2921441 | 0.24244605  |
| TERAO_AOX4_TARGETS_SKIN_DN                                                     | -1.2911899 | 0.24345568  |
| GRAHAM_NORMAL QUIESCENT VS NORMAL DIVIDING UP                                  | -1.2907702 | 0.24384087  |
| RHEIN_ALL_GLUCOCORTICOID_THERAPY_UP                                            | -1.2897921 | 0.24486792  |
| KIM_WT1_TARGETS_8HR_DN                                                         | -1.2896333 | 0.24490607  |
| REACTOME_TAK1_ACTIVATES_NFKB_BY_PHOSPHORYLATION_AND_ACTIVATION_OF_IKKS_COMPLEX | -1.289584  | 0.2447846   |
| KEGG_O_GLYCAN_BIOSYNTHESIS                                                     | -1.2890577 | 0.2452671   |
| CUI_TCF21_TARGETS_UP                                                           | -1.2884506 | 0.24586841  |
| ALONSO_METASTASIS_UP                                                           | -1.2881986 | 0.2460414   |
| YANG_BCL3_TARGETS_UP                                                           | -1.288163  | 0.24592476  |
| KEGG_CITRATE_CYCLE_TCA_CYCLE                                                   | -1.288157  | 0.24576455  |
| AMUNDSON_GENOTOXIC_SIGNATURE                                                   | -1.2880282 | 0.24575068  |
| REACTOME_SIGNALING_BY_CONSTITUTIVELY_ACTIVE_EGFR                               | -1.2873319 | 0.24650557  |
| ST_ADRENERGIC                                                                  | -1.2868303 | 0.24694525  |
| BURTON_ADIPOGENESIS_PEAK_AT_8HR                                                | -1.2864912 | 0.24722072  |
| BIOCARTA_FMLP_PATHWAY                                                          | -1.2864566 | 0.24710506  |
| SMIRNOV_RESPONSE_TO_IR_6HR_UP                                                  | -1.2857015 | 0.24795294  |
| KORKOLA_EMBRYONIC_CARCINOMA_VS_SEMINOMA_UP                                     | -1.2856028 | 0.24791877  |
| VALK_AML_CLUSTER_1                                                             | -1.2855868 | 0.24777678  |
| TONKS_TARGETS_OF_RUNX1_RUNX1T1_FUSION GRANULOCYTE_DN                           | -1.2854912 | 0.24772112  |
| DELYS_THYROID_CANCER_UP                                                        | -1.2851715 | 0.24795301  |
| REACTOME_NCAM_SIGNALING_FOR_NEURITE_OUT_GROWTH                                 | -1.2846897 | 0.24837804  |
| RUTELLA_RESPONSE_TO_HGF_DN                                                     | -1.2838848 | 0.24927731  |
| REACTOME_CIRCADIAN_CLOCK                                                       | -1.2835383 | 0.24952525  |
| BIOCARTA_TOB1_PATHWAY                                                          | -1.2833959 | 0.2495349   |
| PID_INTEGRIN_CS_PATHWAY                                                        | -1.2830276 | 0.24982852  |
| NGUYEN_NOTCH1_TARGETS_UP                                                       | -1.2825217 | 0.24996057  |
| CHYLA_CBF2T3_TARGETS_DN                                                        | -1.2824643 | 0.24986063  |
| PID_TAP63_PATHWAY                                                              | -1.282377  | 0.24979225  |
| REACTOME_PYRUVATE_METABOLISM                                                   | -1.2823195 | 0.2496838   |
| PID_ERBB2_ERBB3_PATHWAY                                                        | -1.2821099 | 0.24979305  |
| HEIDENBLAD_AMPLICON_8Q24_DN                                                    | -1.2819248 | 0.24987537  |
| HALLMARK_HYPOXIA                                                               | -1.9343209 | 0.003701389 |
| HALLMARK_MYOGENESIS                                                            | -1.7780789 | 0.030785104 |
| HALLMARK_ADIPOGENESIS                                                          | -1.7773302 | 0.021206735 |
| HALLMARK_UV_RESPONSE_DN                                                        | -1.7757165 | 0.01590505  |
| HALLMARK_FATTY_ACID_METABOLISM                                                 | -1.719178  | 0.033246625 |
| HALLMARK_XENOBIOTIC_METABOLISM                                                 | -1.7137014 | 0.030426538 |
| HALLMARK_EPITHELIAL_MESENCHYMAL_TRANSITION                                     | -1.7132801 | 0.026491283 |
| HALLMARK_ANGIOGENESIS                                                          | -1.702123  | 0.025130853 |
| HALLMARK_TNFA_SIGNALING_VIA_NFKB                                               | -1.6591991 | 0.036616076 |
| HALLMARK_COAGULATION                                                           | -1.6064554 | 0.05989403  |
| HALLMARK_KRAS_SIGNALING_UP                                                     | -1.6062607 | 0.054449115 |
| HALLMARK_TGF_BETA_SIGNALING                                                    | -1.5910093 | 0.057661135 |
| HALLMARK_REACTIVE_OXIGEN_SPECIES_PATHWAY                                       | -1.5740298 | 0.0669248   |
| HALLMARK_APICAL_JUNCTION                                                       | -1.5653186 | 0.0669838   |
| HALLMARK_UV_RESPONSE_UP                                                        | -1.5192941 | 0.092645    |
| HALLMARK_P53_PATHWAY                                                           | -1.5043527 | 0.09847649  |
| HALLMARK_APOPTOSIS                                                             | -1.4894328 | 0.10333147  |
| HALLMARK_BILE_ACID_METABOLISM                                                  | -1.4288287 | 0.14927363  |
| HALLMARK_ANDROGEN_RESPONSE                                                     | -1.3609293 | 0.2074296   |
| HALLMARK_INFLAMMATORY_RESPONSE                                                 | -1.342231  | 0.21801771  |

|                                  |            |             |
|----------------------------------|------------|-------------|
| HALLMARK_IL2_STAT5_SIGNALING     | -1.3420238 | 0.20780745  |
| HALLMARK_COMPLEMENT              | -1.3364533 | 0.20447488  |
| HALLMARK_IL6_JAK_STAT3_SIGNALING | -1.3350543 | 0.19702226  |
| HALLMARK_CHOLESTEROL_HOMEOSTASIS | -1.3317618 | 0.19267765  |
| HALLMARK_HEDGEHOG_SIGNALING      | -1.3313283 | 0.18551552  |
| TGFB_UP.V1_UP                    | -1.8268613 | 0.009263304 |
| CRX_DN.V1_DN                     | -1.8217821 | 0.005095938 |
| MTOR_UP.V1_DN                    | -1.7907284 | 0.009296646 |
| CYCLIN_D1_UP.V1_UP               | -1.7732236 | 0.008353441 |
| ESC_J1_UP_EARLY.V1_DN            | -1.7624305 | 0.008562529 |
| AKT_UP.V1_DN                     | -1.7476299 | 0.010188025 |
| PTEN_DN.V2_UP                    | -1.745519  | 0.008732594 |
| KRAS.600.LUNG.BREAST_UP.V1_UP    | -1.7122351 | 0.013088155 |
| CAHOY_ASTROGLIAL                 | -1.7090718 | 0.012415528 |
| KRAS.LUNG.BREAST_UP.V1_UP        | -1.6859276 | 0.018834494 |
| MEK_UP.V1_UP                     | -1.6842037 | 0.017516976 |
| LEF1_UP.V1_UP                    | -1.673107  | 0.019857487 |
| AKT_UP_MTOR_DN.V1_DN             | -1.6721607 | 0.018459989 |
| RELA_DN.V1_UP                    | -1.6684818 | 0.018073844 |
| ATF2_UP.V1_DN                    | -1.6601474 | 0.019265994 |
| ATM_DN.V1_UP                     | -1.6601069 | 0.018061869 |
| ATF2_S_UP.V1_DN                  | -1.6564953 | 0.018120518 |
| KRAS.AMP.LUNG_UP.V1_DN           | -1.6546428 | 0.017522685 |
| PKCA_DN.V1_DN                    | -1.6537142 | 0.0168676   |
| KRAS.KIDNEY_UP.V1_DN             | -1.6479995 | 0.01778069  |
| KRAS.DF.V1_UP                    | -1.6426239 | 0.017833982 |
| ESC_V6.5_UP_EARLY.V1_DN          | -1.6338704 | 0.018843627 |
| EGFR_UP.V1_UP                    | -1.6282543 | 0.01933659  |
| KRAS.BREAST_UP.V1_UP             | -1.627373  | 0.018710835 |
| ALK_DN.V1_UP                     | -1.6248406 | 0.018354585 |
| BMI1_DN.V1_UP                    | -1.6108145 | 0.021532347 |
| VEGF_A_UP.V1_UP                  | -1.6038153 | 0.023506911 |
| CYCLIN_D1_KE_V1_UP               | -1.6036391 | 0.022667378 |
| PRC2_EZH2_UP.V1_DN               | -1.6032836 | 0.021885743 |
| E2F1_UP.V1_DN                    | -1.601312  | 0.021464644 |
| NOTCH_DN.V1_DN                   | -1.6012347 | 0.020772235 |
| PKCA_DN.V1_UP                    | -1.6002493 | 0.020292206 |
| WNT_UP.V1_DN                     | -1.5877999 | 0.023557385 |
| ESC_J1_UP_LATE.V1_DN             | -1.5775135 | 0.027111558 |
| MEL18_DN.V1_UP                   | -1.5751077 | 0.02707183  |
| KRAS.600_UP.V1_UP                | -1.5618716 | 0.031388488 |
| STK33_UP                         | -1.5596714 | 0.031151647 |
| KRAS.300_UP.V1_UP                | -1.559405  | 0.030442383 |
| RB_DN.V1_DN                      | -1.5544622 | 0.032088082 |
| RAF_UP.V1_UP                     | -1.5516919 | 0.032294344 |
| KRAS.LUNG_UP.V1_UP               | -1.536515  | 0.03716733  |
| IL15_UP.V1_UP                    | -1.5328391 | 0.038074896 |
| BMI1_DN_MEL18_DN.V1_UP           | -1.5323112 | 0.037235677 |
| IL21_UP.V1_UP                    | -1.5193882 | 0.042287037 |
| ATM_DN.V1_DN                     | -1.5185689 | 0.041583657 |
| CTIP_DN.V1_UP                    | -1.5119797 | 0.043615833 |
| SNF5_DN.V1_DN                    | -1.5105157 | 0.043463834 |
| STK33_NOMO_UP                    | -1.5090694 | 0.0432868   |
| CSR_EARLY_UP.V1_UP               | -1.5088903 | 0.04244557  |
| PTEN_DN.V1_UP                    | -1.5084474 | 0.041804865 |
| KRAS.AMP.LUNG_UP.V1_UP           | -1.5033997 | 0.042792767 |
| KRAS.50_UP.V1_UP                 | -1.4986008 | 0.043812793 |
| TBK1_DF_UP                       | -1.4982817 | 0.043206304 |
| CSR_LATE_UP.V1_DN                | -1.4975197 | 0.042693242 |
| IL2_UP.V1_UP                     | -1.4966111 | 0.042385228 |
| ESC_J1_UP_LATE.V1_UP             | -1.4909562 | 0.044671167 |
| ESC_V6.5_UP_LATE.V1_UP           | -1.4883786 | 0.04511435  |
| PDGF_UP.V1_UP                    | -1.4815412 | 0.047764532 |
| P53_DN.V2_UP                     | -1.4804716 | 0.047568623 |
| ESC_V6.5_UP_LATE.V1_DN           | -1.4800539 | 0.047038127 |
| CYCLIN_D1_KE_V1_DN               | -1.4713784 | 0.050715912 |
| P53_DN.V2_DN                     | -1.4700928 | 0.050410625 |
| NFE2L2.V2                        | -1.4676938 | 0.050629158 |
| CRX_NRL_DN.V1_DN                 | -1.4664907 | 0.050547596 |
| BCAT.100_UP.V1_UP                | -1.4658259 | 0.05011536  |
| KRAS.KIDNEY_UP.V1_UP             | -1.4601307 | 0.05209845  |
| IL15_UP.V1_DN                    | -1.4483613 | 0.058418106 |
| JNK_DN.V1_UP                     | -1.4479736 | 0.05782024  |
| IL21_UP.V1_DN                    | -1.4467633 | 0.0576999   |
| STK33_SKM_UP                     | -1.442272  | 0.05923689  |
| GCNP_SHH_UP_LATE.V1_DN           | -1.4355478 | 0.062101174 |
| JAK2_DN.V1_UP                    | -1.4317498 | 0.06306798  |
| CAHOY_ASTROCYTIC                 | -1.42725   | 0.064839184 |
| TGFB_UP.V1_DN                    | -1.4239416 | 0.066072546 |
| PIGF_UP.V1_DN                    | -1.4144247 | 0.07103832  |

|                                    |            |             |
|------------------------------------|------------|-------------|
| JNK_DN.V1_DN                       | -1.4136763 | 0.070551634 |
| YAP1_UP                            | -1.4100733 | 0.07181478  |
| P53_DN.V1_DN                       | -1.408519  | 0.07251913  |
| AKT_UP_MTOR_DN.V1_UP               | -1.4056826 | 0.07330879  |
| HINATA_NFKB_IMMUN_INF              | -1.403357  | 0.073716    |
| RAPA_EARLY_UP.V1_UP                | -1.4014564 | 0.074136265 |
| NRL_DN.V1_DN                       | -1.3989422 | 0.07465095  |
| ERB2_UP.V1_UP                      | -1.3964726 | 0.075306535 |
| PDGF_ERK_DN.V1_DN                  | -1.395334  | 0.075022735 |
| CAMP_UP.V1_DN                      | -1.3938423 | 0.075010724 |
| KRAS.600_UP.V1_DN                  | -1.3922087 | 0.07510615  |
| KRAS.PROSTATE_UP.V1_DN             | -1.3917236 | 0.07450809  |
| BMI1_DN_MEL18_DN.V1_DN             | -1.3820562 | 0.0795335   |
| CYCLIN_D1_UP.V1_DN                 | -1.3791398 | 0.080847405 |
| PRC1_BMI_UP.V1_DN                  | -1.374955  | 0.08268621  |
| BRCA1_DN.V1_UP                     | -1.373256  | 0.08290526  |
| PRC2_SUZ12_UP.V1_DN                | -1.3708302 | 0.08374393  |
| BMI1_DN.V1_DN                      | -1.3700331 | 0.08377621  |
| KRAS.BREAST_UP.V1_DN               | -1.366522  | 0.08515464  |
| MEL18_DN.V1_DN                     | -1.3638823 | 0.0858852   |
| CORDENONSI_YAP_CONSERVED_SIGNATURE | -1.3632689 | 0.08523645  |
| PRC2_EDD_UP.V1_DN                  | -1.3570739 | 0.08837596  |
| CTIP_DN.V1_DN                      | -1.355971  | 0.08813166  |
| ESC_J1_UP_EARLY.V1_UP              | -1.3534361 | 0.08908413  |
| PIGF_UP.V1_UP                      | -1.3515033 | 0.08941969  |
| WNT_UP.V1_UP                       | -1.3408884 | 0.09601914  |
| IL2_UP.V1_DN                       | -1.340166  | 0.09569191  |
| NOTCH_DN.V1_UP                     | -1.3276929 | 0.10388186  |
| CAHOY_NEURONAL                     | -1.3261712 | 0.103940204 |
| GCNP_SHH_UP_EARLY.V1_DN            | -1.3167297 | 0.10957599  |
| KRAS.600.LUNG.BREAST_UP.V1_DN      | -1.2958099 | 0.12521744  |
| LTE2_UP.V1_UP                      | -1.2924247 | 0.12694329  |
| PDGF_UP.V1_DN                      | -1.2894893 | 0.12822148  |
| MTOR_UP.N4.V1_UP                   | -1.2884619 | 0.12785977  |
| CSR_EARLY_UP.V1_DN                 | -1.2860137 | 0.12932147  |
| DCA_UP.V1_UP                       | -1.2782655 | 0.13476583  |
| KRAS.DF.V1_DN                      | -1.2753756 | 0.13610324  |
| KRAS.PROSTATE_UP.V1_UP             | -1.2689539 | 0.14053084  |
| KRAS.LUNG.BREAST_UP.V1_DN          | -1.2587007 | 0.14880796  |
| RPS14_DN.V1_UP                     | -1.2556431 | 0.15034056  |
| MYC_UP.V1_DN                       | -1.241939  | 0.16152655  |
| RELA_DN.V1_DN                      | -1.2407694 | 0.16135472  |
| PTEN_DN.V1_DN                      | -1.2384492 | 0.16220689  |
| SIRNA_EIF4GI_DN                    | -1.2378436 | 0.16145933  |
| P53_DN.V1_UP                       | -1.232148  | 0.16616315  |
| BCAT_BILD_ET_AL_UP                 | -1.2281852 | 0.16830087  |
| RB_P130_DN.V1_DN                   | -1.2268049 | 0.16840138  |
| ESC_V6.5_UP_EARLY.V1_UP            | -1.217638  | 0.17670724  |
| HOXA9_DN.V1_UP                     | -1.2162886 | 0.17665441  |
| SRC_UP.V1_UP                       | -1.2149576 | 0.17688736  |
| PRC1_BMI_UP.V1_UP                  | -1.1981442 | 0.19313115  |
| EIF4E_DN                           | -1.1957916 | 0.19418514  |
| CRX_NRL_DN.V1_UP                   | -1.1952938 | 0.1933734   |
| ATF2_S_UP.V1_UP                    | -1.191374  | 0.19656081  |
| TBK1.DN.48HRS_UP                   | -1.1899884 | 0.19663556  |
| ATF2_UP.V1_UP                      | -1.1786774 | 0.20787215  |
| NRL_DN.V1_UP                       | -1.1701384 | 0.21569331  |
| SNF5_DN.V1_UP                      | -1.1674505 | 0.21706183  |
| PDGF_ERK_DN.V1_UP                  | -1.1668618 | 0.21606396  |
| KRAS.50_UP.V1_DN                   | -1.1586858 | 0.22366121  |

Table S2. Genesets enriched in VEGFA high tertile

| GENESET NAME                                                            | NES        | FDR q-val  |
|-------------------------------------------------------------------------|------------|------------|
| REACTOME_REGULATION_OF_HYPOXIA_INDUCIBLE_FACTOR_HIF_BY_OXYGEN           | -1.992098  | 0.15175419 |
| WINTER_HYPOXIA_UP                                                       | -1.8602291 | 0.24096495 |
| SCHLOSSER_MYC_TARGETS_AND_SERUM_RESPONSE_DN                             | -1.8425405 | 0.2441887  |
| FOURNIER_ACINAR_DEVELOPMENT_LATE_2                                      | -1.8419722 | 0.20522834 |
| SCHLOSSER_MYC_TARGETS_REPRESSED_BY_SERUM                                | -1.8325429 | 0.20214497 |
| DORMOY_ELAVL1_TARGETS                                                   | -1.8256477 | 0.19533291 |
| CHANG_CORE_SERUM_RESPONSE_UP                                            | -1.8128043 | 0.20793365 |
| CHIBA_RESPONSE_TO_TSA_DN                                                | -1.8080091 | 0.19996026 |
| ZAMORA_NOS2_TARGETS_UP                                                  | -1.8076842 | 0.18221508 |
| WEST_ADRENOCORITICAL_TUMOR_UP                                           | -1.7857813 | 0.22334862 |
| SHEDDEN_LUNG_CANCER_POOR_SURVIVAL_A6                                    | -1.7824106 | 0.2140969  |
| BORCZUK_MALIGNANT_MESOTHELIOMA_UP                                       | -1.7733139 | 0.22375771 |
| RHODES_CANCER_META_SIGNATURE                                            | -1.7670153 | 0.22738065 |
| REACTOME_CELL_CYCLE_CHECKPOINTS                                         | -1.7650546 | 0.21836789 |
| BERENJENO_TRANSFORMED_BY_RHOA_UP                                        | -1.7530313 | 0.24173841 |
| RIZ_ERYTHROID_DIFFERENTIATION                                           | -1.7510055 | 0.23390341 |
| REACTOME_TRANSPORT_OF_MATURE_TRANSCRIPT_TO_CYTOPLASM                    | -1.7468853 | 0.23327804 |
| SU_TESTIS                                                               | -1.7397757 | 0.24085407 |
| VECCHI_GASTRIC_CANCER_EARLY_UP                                          | -1.7346729 | 0.24386929 |
| BASAKI_YBX1_TARGETS_UP                                                  | -1.7346237 | 0.23281164 |
| ABRAMSON_INTERACT_WITH_AIRE                                             | -1.728713  | 0.23990063 |
| REACTOME_GLYCOLYSIS                                                     | -1.7256763 | 0.23886934 |
| REACTOME_CELL_CYCLE                                                     | -1.7254876 | 0.22979905 |
| KARLSSON_TGFB1_TARGETS_UP                                               | -1.7243869 | 0.22352988 |
| GRADE_COLON_AND_RECTAL_CANCER_UP                                        | -1.7195935 | 0.22860678 |
| MENSE_HYPOXIA_UP                                                        | -1.7193012 | 0.22118297 |
| REACTOME_REGULATION_OF_GLUKOKINASE_BY_GLUKOKINASE_REGULATORY_PROTEIN    | -1.7175274 | 0.21761332 |
| KORKOLA_CORRELATED_WITH_POU5F1                                          | -1.7136095 | 0.22093949 |
| SARRIO_EPITHELIAL_MESENCHYMAL_TRANSITION_UP                             | -1.7110211 | 0.21973358 |
| CHAUHAN_RESPONSE_TO_METHOXYESTRADIOL_UP                                 | -1.7084105 | 0.21942142 |
| REACTOME_CELL_CYCLE_MITOTIC                                             | -1.7075816 | 0.21500744 |
| LINDGREN_BLADDER_CANCER_CLUSTER_3_UP                                    | -1.7073891 | 0.20914684 |
| PYEON_CANCER_HEAD_AND_NECK_VS_CERVICAL_UP                               | -1.7070042 | 0.20449515 |
| REACTOME_MITOTIC_M_M_G1_PHASES                                          | -1.7064015 | 0.2002027  |
| REACTOME_LOSS_OF_NLP_FROM_MITOTIC_CENTROSOMES                           | -1.7056215 | 0.19638959 |
| REACTOME_TRANSPORT_OF_RIBONUCLEOPROTEINS_INTO_THE_HOST_NUCLEUS          | -1.7054071 | 0.19174013 |
| LEE_LIVER_CANCER_SURVIVAL_DN                                            | -1.7033445 | 0.1911836  |
| KAUFFMANN_DNA_REPLICATION_GENES                                         | -1.7017217 | 0.18989645 |
| VANTVEER_BREAST_CANCER_METASTASIS_DN                                    | -1.7000599 | 0.18836664 |
| BIDUS_METASTASIS_UP                                                     | -1.6999578 | 0.18412614 |
| GOBERT_OLIGODENDROCYTE_DIFFERENTIATION_UP                               | -1.6980256 | 0.1839228  |
| ZHANG_TLX_TARGETS_36HR_DN                                               | -1.6961782 | 0.18346182 |
| KEGG_SPLICEOSOME                                                        | -1.6931655 | 0.18552475 |
| GRAESSMANN_RESPONSE_TO_MC_AND_SERUM_DEPRIVATION_DN                      | -1.6927384 | 0.18216638 |
| VALK_AML_CLUSTER_7                                                      | -1.6914332 | 0.18115152 |
| REACTOME_PROCESSING_OF_CAPPED_INTRON_CONTAINING_PRE_MRNA                | -1.6907225 | 0.17876679 |
| PID_HIF1A_PATHWAY                                                       | -1.690402  | 0.17569818 |
| REACTOME_M_G1_TRANSITION                                                | -1.689165  | 0.17428744 |
| WANG_RESPONSE_TO_GSK3_INHIBITOR_SB216763_DN                             | -1.6889716 | 0.17116772 |
| BOYVAULT_LIVER_CANCER_SUBCLASS_G3_UP                                    | -1.6886466 | 0.16862836 |
| SLEBOS_HEAD_AND_NECK_CANCER_WITH_HPV_UP                                 | -1.6880437 | 0.16672195 |
| KEGG_GLYOXYLATE_AND_DICARBOXYLATE_METABOLISM                            | -1.6875666 | 0.16449226 |
| REACTOME_TRANSPORT_OF_MATURE_MRNA_DERIVED_FROM_AN_INTRONLESS_TRANSCRIPT | -1.6866041 | 0.16314511 |
| GINESTIER_BREAST_CANCER_20Q13_AMPLIFICATION_DN                          | -1.6848832 | 0.16366582 |
| RICKMAN_TUMOR_DIFFERENTIATED_WELL_VS_MODERATELY_DN                      | -1.6844889 | 0.16157511 |
| REACTOME_DNA_REPLICATION                                                | -1.683555  | 0.16012368 |
| REACTOME_CLEAVAGE_OF_GROWING_TRANSCRIPT_IN_THE_TERMINATION_REGION       | -1.6828911 | 0.15848471 |
| BENPORATH_PROLIFERATION                                                 | -1.6801671 | 0.16088296 |
| REACTOME_FANCONI_ANEMIA_PATHWAY                                         | -1.6801438 | 0.15832232 |
| REACTOME_MRNA_PROCESSING                                                | -1.6795821 | 0.15656309 |
| BENPORATH_ES_CORE_NINE_CORRELATED                                       | -1.6784647 | 0.15614259 |
| MORI_IMMATURE_B_LYMPHOCYTE_DN                                           | -1.6774533 | 0.15558217 |
| LIAO_METASTASIS                                                         | -1.6769913 | 0.15411587 |
| ZHANG_TLX_TARGETS_60HR_DN                                               | -1.6760685 | 0.15352894 |
| WHITFIELD_CELL_CYCLE_G1_S                                               | -1.6744667 | 0.15390643 |
| KRIEG_HYPOXIA_VIA_KDM3A                                                 | -1.6738366 | 0.1526888  |
| REACTOME_CHROMOSOME_MAINTENANCE                                         | -1.6737826 | 0.15058193 |
| REACTOME_INTERACTIONS_OF_VPR_WITH_HOST_CELLULAR_PROTEINS                | -1.6735831 | 0.14877583 |
| ODONNELL_TFRC_TARGETS_DN                                                | -1.6735204 | 0.14678611 |
| WHITFIELD_CELL_CYCLE_S                                                  | -1.6687254 | 0.15206851 |
| KEGG_ONE_CARBON_POOL_BY_FOLATE                                          | -1.6663598 | 0.15386002 |
| REACTOME_RECRUITMENT_OF_MITOTIC_CENTROSOME_PROTEINS_AND_COMPLEXES       | -1.6657605 | 0.15274128 |
| REACTOME_TRANSCRIPTION                                                  | -1.6656411 | 0.15088092 |
| ZHANG_BREAST_CANCER_PROGENITORS_UP                                      | -1.6628035 | 0.15353605 |
| QUELLET_OVARIAN_CANCER_INVASIVE_VS_LMP_UP                               | -1.662685  | 0.1517047  |
| DELPUCH_FOXO3_TARGETS_DN                                                | -1.662669  | 0.14978702 |
| KEGG_HOMOLOGOUS_RECOMBINATION                                           | -1.660598  | 0.15117382 |
| REACTOME_APC_CDC20_MEDIATED_DEGRADATION_OF_NEK2A                        | -1.6603549 | 0.14976428 |
| MITSIADES_RESPONSE_TO_APOLIDIN_DN                                       | -1.6579252 | 0.15171236 |
| WONG_EMBRYONIC_STEM_CELL_CORE                                           | -1.657859  | 0.14995314 |
| MANALO_HYPOXIA_DN                                                       | -1.6569762 | 0.14952219 |
| PID_AURORA_B_PATHWAY                                                    | -1.6565171 | 0.1485491  |
| HOFFMANN_LARGE_TO_SMALL_PRE_BII_LYMPHOCYTE_UP                           | -1.6542556 | 0.15093392 |
| FURUKAWA_DUSP6_TARGETS_PC135_DN                                         | -1.6540877 | 0.14937548 |
| GINESTIER_BREAST_CANCER_ZNF217_AMPLIFIED_DN                             | -1.6519612 | 0.15118827 |
| KAUFFMANN_MELANOMA_RELAPSE_UP                                           | -1.6514062 | 0.1505308  |
| TOYOTA_TARGETS_OF_MIR34B_AND_MIR34C                                     | -1.6472623 | 0.15589587 |
| NADERI_BREAST_CANCER_PROGNOSIS_UP                                       | -1.6471357 | 0.15444884 |

|                                                                     |            |            |
|---------------------------------------------------------------------|------------|------------|
| GRADE_METASTASIS_DN                                                 | -1.6471082 | 0.15281008 |
| WINNEPENNINGCKX_MELANOMA_METASTASIS_UP                              | -1.6455221 | 0.15382092 |
| EPPERT_PROGENITOR                                                   | -1.640971  | 0.16027701 |
| BHATI_G2M_ARREST_BY_2METHOXYESTRADIOL_UP                            | -1.635542  | 0.16808373 |
| CHIANG_LIVER_CANCER_SUBCLASS_PROLIFERATION_UP                       | -1.6347209 | 0.16795897 |
| REACTOME_G1_S_TRANSITION                                            | -1.6343805 | 0.16669184 |
| LEE_EARLY_T_LYMPHOCYTE_UP                                           | -1.6338979 | 0.16593337 |
| PID_ATR_PATHWAY                                                     | -1.6337888 | 0.16447753 |
| MORI_LARGE_PRE_BII_LYMPHOCYTE_UP                                    | -1.6322043 | 0.16571441 |
| NAKAYAMA_SOFT_TISSUE_TUMORS_PCA2_UP                                 | -1.6309459 | 0.16622935 |
| REACTOME_NEP_NS2_INTERACTS_WITH_THE_CELLULAR_EXPORT_MACHINERY       | -1.6305529 | 0.16538805 |
| KAUFFMANN_DNA_REPAIR_GENES                                          | -1.6302354 | 0.16435865 |
| REACTOME_MITOTIC_PROMETAPHASE                                       | -1.6288185 | 0.1650327  |
| RUIZ_TNC_TARGETS_DN                                                 | -1.6280658 | 0.16475888 |
| STANELLE_E2F1_TARGETS                                               | -1.6280206 | 0.16324419 |
| SMITH_TERT_TARGETS_UP                                               | -1.6268743 | 0.1636044  |
| REACTOME_MITOTIC_G2_G2_M_PHASES                                     | -1.6251175 | 0.16505349 |
| GEORGES_CELL_CYCLE_MIR192_TARGETS                                   | -1.6242036 | 0.16512945 |
| YUAN_ZNF143_PARTNERS                                                | -1.6241395 | 0.16378337 |
| REACTOME_KINESINS                                                   | -1.6232445 | 0.16380697 |
| REACTOME_MRNA_3_END_PROCESSING                                      | -1.6219792 | 0.1644601  |
| DANG_REGULATED_BY_MYC_UP                                            | -1.6212804 | 0.1643235  |
| DOANE_BREAST_CANCER_CLASSES_DN                                      | -1.6200864 | 0.1647658  |
| KOKKINAKIS_METHIONINE_DEPRIVATION_96HR_DN                           | -1.6199242 | 0.16357465 |
| KEGG_CELL_CYCLE                                                     | -1.6183794 | 0.16468439 |
| NIKOLSKY_BREAST_CANCER_8Q23_Q24_AMPICON                             | -1.6182566 | 0.16344488 |
| MUELLER_COMMON_TARGETS_OF_AML_FUSIONS_DN                            | -1.6164446 | 0.1651721  |
| PENG_GLUTAMINE_DEPRIVATION_DN                                       | -1.6163756 | 0.16387397 |
| BIOCARTA_G2_PATHWAY                                                 | -1.6158491 | 0.16340224 |
| REACTOME_APC_C_CDC20_MEDIATED_DEGRADATION_OF_CYCLIN_B               | -1.6156418 | 0.16228834 |
| HAHTOLA_MYCOSIS_FUNGOIDES_UP                                        | -1.6150782 | 0.16169876 |
| REACTOME_MITOTIC_G1_G1_S_PHASES                                     | -1.615022  | 0.1604446  |
| KOBAYASHI_EGFR_SIGNALING_24HR_DN                                    | -1.6146802 | 0.15972869 |
| REACTOME_ASSEMBLY_OF_THE_PRE_REPLICATIVE_COMPLEX                    | -1.6141256 | 0.15936004 |
| PENG_LEUCINE_DEPRIVATION_DN                                         | -1.6140403 | 0.15821199 |
| NGO_MALIGNANT_GLIOMA_1P_LOH                                         | -1.6138633 | 0.1571644  |
| WAKASUGI_HAVE_ZNF143_BINDING_SITES                                  | -1.6134956 | 0.15661311 |
| MARTINEZ_RESPONSE_TO TRABECTEDIN_DN                                 | -1.6130326 | 0.15621108 |
| SHEPARD_CRUSH_AND_BURN_MUTANT_DN                                    | -1.6115589 | 0.1574932  |
| KEGG_BASAL_TRANSCRIPTION_FACTORS                                    | -1.6109065 | 0.15715349 |
| SONG_TARGETS_OF_IE86_CMV_PROTEIN                                    | -1.6088951 | 0.15925983 |
| MISSIAGLIA_REGULATED_BY_METHYLATION_DN                              | -1.6077152 | 0.15983817 |
| REACTOME_MRNA_SPLICING                                              | -1.6076022 | 0.15879615 |
| REACTOME_TRANSCRIPTIONAL_ACTIVITY_OF_SMAD2_SMAD3_SMAD4_HETEROTRIMER | -1.6064762 | 0.15936036 |
| BENPORATH_ES_2                                                      | -1.6064495 | 0.15818974 |
| HU_ANGIOGENESIS_DN                                                  | -1.6054612 | 0.15869164 |
| MUELLER_PLURINET                                                    | -1.6043282 | 0.15934817 |
| FERREIRA_EWINGS_SARCOMA_UNSTABLE_VS_STABLE_UP                       | -1.6042379 | 0.15829976 |
| PUJANA_XPRS_INT_NETWORK                                             | -1.6032546 | 0.15871522 |
| KIM_WT1_TARGETS_DN                                                  | -1.6031314 | 0.15776876 |
| VERNELL_RETINOBLASTOMA_PATHWAY_UP                                   | -1.6030675 | 0.15676092 |
| REACTOME_G2_M_CHECKPOINTS                                           | -1.6020985 | 0.15723136 |
| TIEN_INTESTINE_PROBIOTICS_24HR_UP                                   | -1.6000394 | 0.15930872 |
| PID_P53_REGULATION_PATHWAY                                          | -1.5990673 | 0.15967286 |
| LI_WILMS_TUMOR_VS_FETAL_KIDNEY_1_DN                                 | -1.5987145 | 0.15917258 |
| BLUM_RESPONSE_TO_SALIRASIB_DN                                       | -1.5952458 | 0.1641535  |
| FUJII_YBX1_TARGETS_DN                                               | -1.5943611 | 0.16439967 |
| MARKEY_RB1_ACUTE_LOF_UP                                             | -1.5932975 | 0.1650879  |
| REACTOME_METABOLISM_OF_NON_CODING_RNA                               | -1.5931674 | 0.16419514 |
| VANTVEER_BREAST_CANCER_ESR1_DN                                      | -1.5900904 | 0.16852312 |
| PUJANA_BRCA_CENTERED_NETWORK                                        | -1.5899993 | 0.16753809 |
| LEONARD_HYPOXIA                                                     | -1.5896846 | 0.1668683  |
| REACTOME_S_PHASE                                                    | -1.5893276 | 0.16640233 |
| PYEON_HP_V_POSITIVE_TUMORS_UP                                       | -1.5890535 | 0.16572997 |
| RAMASWAMY_METASTASIS_UP                                             | -1.5887909 | 0.16523398 |
| HU_GENOTOXIC_DAMAGE_4HR                                             | -1.5844682 | 0.17142238 |
| WHITEFORD_PEDIATRIC_CANCER_MARKERS                                  | -1.5843512 | 0.17053364 |
| TOMIDA_METASTASIS_DN                                                | -1.5840212 | 0.17001373 |
| CHICAS_RB1_TARGETS_LOW_SERUM                                        | -1.5833598 | 0.17013626 |
| SCHUHMACHER_MYC_TARGETS_UP                                          | -1.5829746 | 0.16968699 |
| YANG_BREAST_CANCER_ESR1_BULK_DN                                     | -1.5825608 | 0.16921358 |
| FIRESTEIN_CTNNB1_PATHWAY                                            | -1.5807706 | 0.17104031 |
| GARCIA_TARGETS_OF_FL11_AND_DAX1_DN                                  | -1.5800741 | 0.17108908 |
| REACTOME_TELOMERE_MAINTENANCE                                       | -1.5800488 | 0.17008388 |
| STEIN_ESRRA_TARGETS_RESPONSIVE_TO_ESTROGEN_DN                       | -1.5797786 | 0.16950467 |
| CHEMNITZ_RESPONSE_TO_PROSTAGLANDIN_E2_UP                            | -1.579516  | 0.16883695 |
| RHODES_UNDIFFERENTIATED_CANCER                                      | -1.5790429 | 0.16854113 |
| SMITH_LIVER_CANCER                                                  | -1.579035  | 0.16755067 |
| FARDIN_HYPOXIA_11                                                   | -1.5790323 | 0.16656415 |
| REACTOME_ACTIVATION_OF_GENES_BY_ATF4                                | -1.5788072 | 0.16589898 |
| MOLENAAR_TARGETS_OF_CCND1_AND_CDK4_DN                               | -1.5782138 | 0.16579218 |
| REACTOME_ACTIVATION_OF_ATR_IN_RESPONSE_TO_REPLICATION_STRESS        | -1.5762703 | 0.16801113 |
| SESTO_RESPONSE_TO_UV_C1                                             | -1.5756549 | 0.16789788 |
| ZHANG_TLX_TARGETS_DN                                                | -1.5755657 | 0.16707094 |
| AMIT_SERUM_RESPONSE_480_MCF10A                                      | -1.5751086 | 0.16695186 |
| SIMBULAN_PARP1_TARGETS_DN                                           | -1.574796  | 0.16643913 |
| WHITFIELD_CELL_CYCLE_G2_M                                           | -1.5737758 | 0.16735135 |
| PID_FANCONI_PATHWAY                                                 | -1.573389  | 0.16709724 |
| SENGUPTA_NASOPHARYNGEAL_CARCINOMA_UP                                | -1.5733384 | 0.16623692 |
| BENPORATH_ES_1                                                      | -1.5733174 | 0.16535817 |

|                                                                                                                                      |            |            |
|--------------------------------------------------------------------------------------------------------------------------------------|------------|------------|
| REACTOME_INHIBITION_OF_THE_PROTEOLYTIC_ACTIVITY_OF_APC_C_REQUIRED_FOR_THE_ONSET_OF_ANAPHASE_BY_MITOTIC_SPINDLE_CHECKPOINT_COMPONENTS | -1.5719701 | 0.16659893 |
| CHANG_CYCLING_GENES                                                                                                                  | -1.5716141 | 0.16623226 |
| ZHOU_CELL_CYCLE_GENES_IN_IR_RESPONSE_6HR                                                                                             | -1.5715729 | 0.1653871  |
| NIELSEN_LIPOSARCOMA_DN                                                                                                               | -1.571129  | 0.1648962  |
| SHEPARD_BMYB_TARGETS                                                                                                                 | -1.5699023 | 0.16622594 |
| PUJANA_BREAST_CANCER_WITH_BRCA1_MUTATED_UP                                                                                           | -1.5693951 | 0.1662001  |
| CROONQUIST_NRAS_SIGNALING_DN                                                                                                         | -1.5689816 | 0.16588698 |
| BIOCARTA_ATRBRCA_PATHWAY                                                                                                             | -1.5686605 | 0.16559152 |
| REACTOME_ACTIVATION_OF_THE_PRE_REPLICATIVE_COMPLEX                                                                                   | -1.5675495 | 0.1663134  |
| QI_HYPOXIA                                                                                                                           | -1.5672412 | 0.16589661 |
| BOYVAULT_LIVER_CANCER_SUBCLASS_G23_UP                                                                                                | -1.5666295 | 0.165882   |
| SUNG_METASTASIS_STROMA_DN                                                                                                            | -1.566507  | 0.16521084 |
| PID_E2F_PATHWAY                                                                                                                      | -1.5661094 | 0.16493465 |
| KANG_FLUOROURACIL_RESISTANCE_DN                                                                                                      | -1.5643716 | 0.1670379  |
| REACTOME_DEPOSITION_OF_NEW_CENPA_CONTAINING_NUCLEOSOMES_AT_THE_CENTROMERE                                                            | -1.5639998 | 0.16677037 |
| OXFORD_RALA_OR_RALB_TARGETS_UP                                                                                                       | -1.5638263 | 0.16624062 |
| KONG_E2F3_TARGETS                                                                                                                    | -1.563233  | 0.16648528 |
| CROONQUIST_IL6_DEPRIVATION_DN                                                                                                        | -1.5631058 | 0.16585372 |
| NAKAMURA_CANCER_MICROENVIRONMENT_DN                                                                                                  | -1.5626523 | 0.16570048 |
| TARTE_PLASMA_CELL_VS_PLASMABLAST_DN                                                                                                  | -1.5625372 | 0.16503562 |
| ZHAN_MULTIPLE_MYELOMA_SUBGROUPS                                                                                                      | -1.5619972 | 0.16503699 |
| SMID_BREAST_CANCER_RELAPSE_IN_BONE_DN                                                                                                | -1.5613464 | 0.16528895 |
| REACTOME_SYNTHESIS_OF_DNA                                                                                                            | -1.5611132 | 0.16480997 |
| REACTOME_MEIOSIS                                                                                                                     | -1.5608542 | 0.16435264 |
| REACTOME_PERK_REGULATED_GENE_EXPRESSION                                                                                              | -1.5602849 | 0.16449624 |
| REACTOME_SIGNALING_BY_HIPPO                                                                                                          | -1.5591296 | 0.16536395 |
| CHIARADONNA_NEOPLASTIC_TRANSFORMATION_KRAS_UP                                                                                        | -1.5581107 | 0.1661781  |
| PRAMOONJAGO_SOX4_TARGETS_UP                                                                                                          | -1.5576438 | 0.16608267 |
| REACTOME_HOMOLOGOUS_RECOMBINATION_REPAIR_OF_REPLICATION_INDEPENDENT_DOUBLE_STRAND_BREAKS                                             | -1.5574464 | 0.16560377 |
| IWANAGA_E2F1_TARGETS_INDUCED_BY_SERUM                                                                                                | -1.556275  | 0.16662988 |
| GARGALOVIC_RESPONSE_TO_OXIDIZED_PHOSPHOLIPIDS_TURQUOISE_DN                                                                           | -1.5556213 | 0.1669882  |
| REACTOME_PROCESSING_OF_CAPPED_INTRONLESS_PRE_MRNA                                                                                    | -1.5554304 | 0.16650805 |
| WEST_ADRENOCORTICAL_TUMOR_MARKERS_UP                                                                                                 | -1.5553923 | 0.16580825 |
| LI_WILMS_TUMOR_ANAPLASTIC_UP                                                                                                         | -1.5543692 | 0.1665625  |
| PEART_HDAC_PROLIFERATION_CLUSTER_DN                                                                                                  | -1.553795  | 0.16664942 |
| BOYVAULT_LIVER_CANCER_SUBCLASS_G123_UP                                                                                               | -1.5532304 | 0.16672078 |
| ZHAN_MULTIPLE_MYELOMA_PR_UP                                                                                                          | -1.5525037 | 0.16711697 |
| BURTON_ADIPOGENESIS_PEAK_AT_16HR                                                                                                     | -1.551339  | 0.16807666 |
| KEGG_GLYCOPHINGOLIPID_BIOSYNTHESIS_LACTO_AND_NEOLACTO_SERIES                                                                         | -1.5498782 | 0.16952436 |
| GAVIN_FOXP3_TARGETS_CLUSTER_P6                                                                                                       | -1.5494441 | 0.16945718 |
| HORIUCHI_WTAP_TARGETS_DN                                                                                                             | -1.5487746 | 0.16988666 |
| PID_PLK1_PATHWAY                                                                                                                     | -1.5483071 | 0.1698491  |
| CHEN_HOXAS_TARGETS_9HR_UP                                                                                                            | -1.5477772 | 0.16997384 |
| KAMMINGA_EZH2_TARGETS                                                                                                                | -1.5474226 | 0.16977538 |
| CHEN_ETV5_TARGETS_TESTIS                                                                                                             | -1.5470489 | 0.16960448 |
| TOMIDA_METASTASIS_UP                                                                                                                 | -1.5467411 | 0.16934194 |
| FRASOR_RESPONSE_TO_SERM_OR_FULVESTRANT_DN                                                                                            | -1.5464422 | 0.16902614 |
| REN_BOUND_BY_E2F                                                                                                                     | -1.5460086 | 0.16892892 |
| ZWANG_EGF_INTERVAL_UP                                                                                                                | -1.5457035 | 0.1686638  |
| STONER_ESOPHAGEAL_CARCINOGENESIS_UP                                                                                                  | -1.5429437 | 0.1720166  |
| GENTILE_RESPONSE_CLUSTER_D3                                                                                                          | -1.5427736 | 0.17154235 |
| WELCSH_BRCA1_TARGETS_DN                                                                                                              | -1.542494  | 0.1712434  |
| REACTOME_RNA_POL_I_RNA_POL_III_AND_MITOCHONDRIAL_TRANSCRIPTION                                                                       | -1.5420065 | 0.17125595 |
| MOREAUX_MULTIPLE_MYELOMA_BY_TACI_DN                                                                                                  | -1.541868  | 0.17074196 |
| BHATTACHARYA_EMBRYONIC_STEM_CELL                                                                                                     | -1.541372  | 0.1707365  |
| REACTOME_MEIOTIC_RECOMBINATION                                                                                                       | -1.5407544 | 0.17101797 |
| SOTIRIOU_BREAST_CANCER_GRADE_1_VS_3_UP                                                                                               | -1.5401002 | 0.17130916 |
| JIANG_HYPOXIA_VIA_VHL                                                                                                                | -1.5397294 | 0.17121461 |
| ZHOU_CELL_CYCLE_GENES_IN_IR_RESPONSE_24HR                                                                                            | -1.5388961 | 0.17192215 |
| REACTOME_LATE_PHASE_OF_HIV_LIFE_CYCLE                                                                                                | -1.5385085 | 0.17187108 |
| PID_BARD1_PATHWAY                                                                                                                    | -1.5384858 | 0.1712086  |
| CAFFAREL_RESPONSE_TO_THC_24HR_5_DN                                                                                                   | -1.538085  | 0.17115185 |
| MULLIGAN_NTF3_SIGNALING_VIA_INSR_AND_IGF1R_UP                                                                                        | -1.5375448 | 0.17133018 |
| GRAHAM_CML_DIVIDING_VS_NORMAL QUIESCENT UP                                                                                           | -1.536621  | 0.17199428 |
| FOURNIER_ACINAR_DEVELOPMENT_LATE_DN                                                                                                  | -1.5363482 | 0.17169182 |
| TERAMOTO_OPN_TARGETS_CLUSTER_7                                                                                                       | -1.5358213 | 0.17177226 |
| LY_AGING_OLD_DN                                                                                                                      | -1.5357184 | 0.17121793 |
| TANG_SENESCENCE_TPS3_TARGETS_DN                                                                                                      | -1.5356054 | 0.17067577 |
| XU_HGF_SIGNALING_NOT_VIA_AKT1_48HR_DN                                                                                                | -1.5339952 | 0.17220709 |
| ODONNELL_TARGETS_OF_MYC_AND_TFRC_DN                                                                                                  | -1.5339605 | 0.17155054 |
| REACTOME_EXTENSION_OF_TELOMERES                                                                                                      | -1.5333421 | 0.17182374 |
| ZHENG_GLIOMASTOMA_PLASTICITY_UP                                                                                                      | -1.532588  | 0.1722537  |
| PUJANA_BRCA2_PCC_NETWORK                                                                                                             | -1.5323033 | 0.1719752  |
| ROSTY_CERVICAL_CANCER_PROLIFERATION_CLUSTER                                                                                          | -1.5323027 | 0.17129813 |
| REACTOME_REGULATION_OF_MITOTIC_CELL_CYCLE                                                                                            | -1.532029  | 0.170983   |
| IIZUKA_LIVER_CANCER_PROGRESSION_G1_G2_DN                                                                                             | -1.5312673 | 0.17144076 |
| XU_HGF_TARGETS_INDUCED_BY_AKT1_48HR_DN                                                                                               | -1.5312183 | 0.17080139 |
| UDAYAKUMAR_MED1_TARGETS_UP                                                                                                           | -1.5311596 | 0.17021944 |
| DORN_ADENOVIRUS_INFECTION_12HR_DN                                                                                                    | -1.5298859 | 0.17134635 |
| LE_EGR2_TARGETS_UP                                                                                                                   | -1.529745  | 0.17092    |
| DAZARD_UV_RESPONSE_CLUSTER_G2                                                                                                        | -1.5296445 | 0.17044437 |
| DANG_MYC_TARGETS_UP                                                                                                                  | -1.5294043 | 0.17015404 |
| WU_APOPTOSIS_BY_CDKN1A_VIA_TPS3                                                                                                      | -1.5276759 | 0.1720475  |
| FEVR_CTNNB1_TARGETS_DN                                                                                                               | -1.5262167 | 0.17360228 |
| WHITFIELD_CELL_CYCLE_G2                                                                                                              | -1.5262148 | 0.17294717 |
| REACTOME_RNA_POL_I_TRANSCRIPTION                                                                                                     | -1.5260155 | 0.17252849 |
| NIKOLSKY_BREAST_CANCER_6P2A_P22_AMPLICON                                                                                             | -1.5257934 | 0.17223123 |
| SMID_BREAST_CANCER_RELAPSE_IN_BRAIN_UP                                                                                               | -1.5255109 | 0.17202619 |
| REACTOME_DNA_STRAND_ELONGATION                                                                                                       | -1.5254335 | 0.1714895  |
| SHEPARD_BMYB_MORPHOLINO_DN                                                                                                           | -1.5252254 | 0.1711711  |

|                                                                     |            |            |
|---------------------------------------------------------------------|------------|------------|
| KEGG_DNA_REPLICATION                                                | -1.5227515 | 0.17449692 |
| YAMAZAKI_TCEB3_TARGETS_DN                                           | -1.5227098 | 0.17393972 |
| YIH_RESPONSE_TO_ARSENITE_C4                                         | -1.5226806 | 0.17337096 |
| DEN_INTERACT_WITH_LCA5                                              | -1.5196743 | 0.17745726 |
| BURTON_ADIPOGENESIS_3                                               | -1.5196698 | 0.17681709 |
| GARGALOVIC_RESPONSE_TO_OXIDIZED_PHOSPHOLIPIDS_BLUE_UP               | -1.5185305 | 0.17790501 |
| REACTOME_MEIOTIC_SYNOPSIS                                           | -1.5175426 | 0.17863737 |
| PID_MYC_PATHWAY                                                     | -1.5170239 | 0.1787104  |
| NAKAMURA_TUMOR_ZONE_PERIPHERAL_VS_CENTRAL_UP                        | -1.5167829 | 0.1784333  |
| AMIT_SERUM_RESPONSE_120_MCF10A                                      | -1.5154618 | 0.17974123 |
| SPIRA_SMOKERS_LUNG_CANCER_DN                                        | -1.5150768 | 0.17969447 |
| KIM_MYCL1_AMPLIFICATION_TARGETS_DN                                  | -1.5148727 | 0.17937928 |
| CAFFAREL_RESPONSE_TO_THC_24HR_5_UP                                  | -1.5136397 | 0.18068124 |
| SHIPP_DLCL_VS_FOLLICULAR_LYMPHOMA_UP                                | -1.5136259 | 0.18006302 |
| CHOW_RASSF1_TARGETS_UP                                              | -1.513303  | 0.1798793  |
| CHANDRAN_METASTASIS_UP                                              | -1.5124723 | 0.18049586 |
| REACTOME_G0_AND_EARLY_G1                                            | -1.5116556 | 0.181237   |
| GENTILE_UV_RESPONSE_CLUSTER_D4                                      | -1.5114816 | 0.18092015 |
| PID_ATM_PATHWAY                                                     | -1.5114379 | 0.18037972 |
| YU_MYC_TARGETS_UP                                                   | -1.5113616 | 0.17986983 |
| ONDER_CDH1_TARGETS_1_DN                                             | -1.5107675 | 0.18012798 |
| GRAHAM_NORMAL QUIESCENT_VS_NORMAL_DIVIDING_DN                       | -1.5106637 | 0.17965487 |
| KIM_HYPOXIA                                                         | -1.5068113 | 0.18496963 |
| FERRANDO_HOX11_NEIGHBORS                                            | -1.5051081 | 0.18690068 |
| GRAHAM_CML QUIESCENT_VS_NORMAL QUIESCENT_UP                         | -1.5046791 | 0.18692732 |
| DING_LUNG_CANCER_EXPRESSION_BY_COPY_NUMBER                          | -1.5040187 | 0.18730432 |
| HEDENFALK_BREAST_CANCER_BRCA1_VS_BRCA2                              | -1.503088  | 0.18811944 |
| AKL_HTLV1_INFECTION_UP                                              | -1.5012492 | 0.19036333 |
| PURBEY_TARGETS_OF_CTBP1_AND_SATB1_UP                                | -1.4989086 | 0.19350502 |
| LANDIS_ERBB2_BREAST_PNEOPLASTIC_UP                                  | -1.4975704 | 0.19507132 |
| REACTOME_RNA_POL_II_TRANSCRIPTION                                   | -1.4968093 | 0.19683361 |
| WILCOX_RESPONSE_TO_PROGESTERONE_UP                                  | -1.4959176 | 0.19648369 |
| SABATES_COLORECTAL_ADENOMA_UP                                       | -1.4955621 | 0.19635016 |
| REACTOME_REGULATORY_RNA_PATHWAYS                                    | -1.4946551 | 0.19708925 |
| PID_MYC_ACTIV_PATHWAY                                               | -1.4939388 | 0.19766468 |
| REACTOME_MICRORNA_MIRNA_BIOGENESIS                                  | -1.4938315 | 0.19717932 |
| VANTVEER_BREAST_CANCER_POOR_PROGNOSIS                               | -1.4929174 | 0.1979612  |
| PID_AURORA_A_PATHWAY                                                | -1.492501  | 0.19801365 |
| CROONQUIST_NRAS_VS_STROMAL_STIMULATION_DN                           | -1.4923496 | 0.19764505 |
| J1_RESPONSE_TO_FSH_DN                                               | -1.4922303 | 0.19719386 |
| KANG_DOXORUBICIN_RESISTANCE_UP                                      | -1.4918222 | 0.19719651 |
| SMID_BREAST_CANCER_RELAPSE_IN_LUNG_UP                               | -1.4901114 | 0.19931918 |
| MEINHOLD_OVARIAN_CANCER_LOW_GRADE_DN                                | -1.4898854 | 0.19905025 |
| CUI_GLUCOSE_DEPRIVATION                                             | -1.4883394 | 0.20080309 |
| REACTOME_HIV_LIFE_CYCLE                                             | -1.4873822 | 0.20162031 |
| REACTOME_DNA_REPAIR                                                 | -1.4872034 | 0.20126705 |
| OLSSON_E2F3_TARGETS_DN                                              | -1.4863805 | 0.20203315 |
| MORI_PRE_B1_LYMPHOCYTE_UP                                           | -1.4862452 | 0.2015782  |
| ISHIDA_E2F_TARGETS                                                  | -1.4835317 | 0.20536703 |
| WU_HBX_TARGETS_2_DN                                                 | -1.4834472 | 0.2048249  |
| Q1_HYPOXIA_TARGETS_OF_HIF1A_AND_FOXA2                               | -1.4818519 | 0.20674369 |
| CAFFAREL_RESPONSE_TO_THC_DN                                         | -1.4809637 | 0.20748563 |
| SESTO_RESPONSE_TO_UV_C3                                             | -1.4800824 | 0.20833124 |
| SCIBETTA_KDMSB_TARGETS_DN                                           | -1.4792341 | 0.209124   |
| PETROVA_PROX1_TARGETS_UP                                            | -1.4787617 | 0.20937532 |
| DUTERTRE ESTRADIOL_RESPONSE_24HR_UP                                 | -1.4769064 | 0.21181749 |
| REICHERT_MITOSIS_LIN9_TARGETS                                       | -1.4759378 | 0.21285048 |
| WHITFIELD_CELL_CYCLE_LITERATURE                                     | -1.4743432 | 0.21494402 |
| MOREAUX_B_LYMPHOCYTE_MATURATION_BY_TACI_DN                          | -1.4740589 | 0.21483831 |
| MEISSNER_BRAIN_HCP_WITH_H3_UNMETHYLATED                             | -1.4739852 | 0.21428831 |
| PID_HIF2PATHWAY                                                     | -1.4733762 | 0.21468583 |
| PUJANA_BREAST_CANCER_LIT_INT_NETWORK                                | -1.4699026 | 0.21991499 |
| YANG_BREAST_CANCER_ESR1_LASER_DN                                    | -1.468906  | 0.22101864 |
| REACTOME_CONVERSION_FROM_APC_C_CDC20_TO_APC_C_CDH1_IN_LATE_ANAPHASE | -1.4688956 | 0.22037931 |
| GHO_ATF5_TARGETS_DN                                                 | -1.4681103 | 0.22108378 |
| PID_MTOR_4PATHWAY                                                   | -1.4655005 | 0.22521472 |
| CROMER_METASTASIS_DN                                                | -1.4634619 | 0.22813638 |
| REACTOME_APOPTOTIC_EXECUTION_PHASE                                  | -1.4634271 | 0.22751848 |
| REACTOME_APC_C_CDC20_MEDIATED_DEGRADATION_OF_MITOTIC_PROTEINS       | -1.46203   | 0.22926502 |
| HEIDENBLAD_AMPLICON_8Q24_UP                                         | -1.4613885 | 0.22970018 |
| JEON_SMAD6_TARGETS_DN                                               | -1.4599204 | 0.23154463 |
| REACTOME_PHOSPHORYLATION_OF_THE_APC_C                               | -1.459785  | 0.23111285 |
| REACTOME_ORC1_REMOVAL_FROM_CHROMATIN                                | -1.458519  | 0.23267843 |
| BURTON_ADIPOGENESIS_PEAK_AT_24HR                                    | -1.4582341 | 0.23244156 |
| REACTOME_DOUBLE_STRAND_BREAK_REPAIR                                 | -1.4567097 | 0.23451656 |
| YANG_BREAST_CANCER_ESR1_DN                                          | -1.4564614 | 0.234268   |
| MATZUK_SPERMATOCYTE                                                 | -1.4553223 | 0.23568343 |
| JOHNSTONE_PARVB_TARGETS_2_DN                                        | -1.454672  | 0.23619334 |
| PENG_RAPAMYCIN_RESPONSE_DN                                          | -1.4536752 | 0.23726685 |
| KRIGE_AMINO_ACID_DEPRIVATION                                        | -1.4523585 | 0.23882625 |
| MARIADASON_RESPONSE_TO_BUTYRATE_SULINDAC_4                          | -1.4523437 | 0.2381656  |
| CHIN_BREAST_CANCER_COPY_NUMBER_UP                                   | -1.4522085 | 0.23768723 |
| LINDGREN_BLADDER_CANCER_CLUSTER_1_DN                                | -1.45195   | 0.2374837  |
| SMID_BREAST_CANCER_LUMINAL_A_DN                                     | -1.4517406 | 0.23721771 |
| LU_TUMOR_ANGIOGENESIS_UP                                            | -1.4516915 | 0.23665132 |
| KEGG_BASE_EXCISION_REPAIR                                           | -1.4516908 | 0.23598658 |
| FIGUEROA_AML_METHYLATION_CLUSTER_2_UP                               | -1.4491377 | 0.23969227 |
| HESS_TARGETS_OF_HOXA9_AND_MEI51_UP                                  | -1.4488539 | 0.23953965 |
| REACTOME_SMAD2_SMAD3_SMAD4_HETEROTRIMER_REGULATES_TRANSCRIPTION     | -1.448561  | 0.23938696 |
| MATZUK_MEIOTIC_AND_DNA_REPAIR                                       | -1.4466381 | 0.24213476 |

|                                                                  |            |             |
|------------------------------------------------------------------|------------|-------------|
| REACTOME_TRANSCRIPTION_COUPLED_NER_TC_NER                        | -1.446309  | 0.24201095  |
| ELVIDGE_HIF1A_TARGETS_DN                                         | -1.4455565 | 0.24272929  |
| REACTOME_CYTOSOLIC_TRNA_AMINOACYLATION                           | -1.4449135 | 0.24323092  |
| PID_P13KCI_AKT_PATHWAY                                           | -1.4448769 | 0.24262011  |
| MENSSSEN_MYC_TARGETS                                             | -1.4436105 | 0.24429522  |
| KEGG_MISMATCH_REPAIR                                             | -1.4429702 | 0.24476427  |
| REACTOME_AMINO_ACID_SYNTHESIS_AND_INTERCONVERSION_TRANSAMINATION | -1.4427787 | 0.24443886  |
| DOANE_BREAST_CANCER_ESR1_DN                                      | -1.4424251 | 0.2443242   |
| GAZIN_EPIGENETIC_SILENCING_BY_KRAS                               | -1.4405731 | 0.24702765  |
| GREENBAUM_E2A_TARGETS_UP                                         | -1.4395119 | 0.24823758  |
| UEDA_PERIPHERAL_CLOCK                                            | -1.4392681 | 0.24803141  |
| KAPOSI_LIVER_CANCER_MET_UP                                       | -1.4390097 | 0.24784781  |
| KENNY_CTNNB1_TARGETS_UP                                          | -1.4383125 | 0.24847035  |
| YAO_TEMPORAL_RESPONSE_TO_PROGESTERONE_CLUSTER_14                 | -1.4381198 | 0.2481428   |
| REACTOME_BASIGIN_INTERACTIONS                                    | -1.4370369 | 0.24952668  |
| PID_FOXO_PATHWAY                                                 | -1.4368865 | 0.24910866  |
| JAEGER_METASTASIS_UP                                             | -1.4368708 | 0.24846773  |
| YU_BAP1_TARGETS                                                  | -1.4367682 | 0.24799475  |
| BIOCARTA_ACTINY_PATHWAY                                          | -1.4342463 | 0.24994634  |
| CSR_EARLY_UP.V1_UP                                               | -1.778913  | 0.026930494 |
| RPS14_DN.V1_DN                                                   | -1.616988  | 0.13652802  |
| GCNP_SHH_UP_LATE.V1_UP                                           | -1.5740153 | 0.14860031  |
| E2F1_UP.V1_UP                                                    | -1.5603833 | 0.13109927  |
| GCNP_SHH_UP_EARLY.V1_UP                                          | -1.5360478 | 0.13961783  |
| SIRNA_EIF4GI_DN                                                  | -1.5286465 | 0.12640621  |
| MTOR_UP.V1_UP                                                    | -1.5278184 | 0.10919107  |
| PRC2_EZH2_UP.V1_UP                                               | -1.5123637 | 0.11226115  |
| CSR_LATE_UP.V1_UP                                                | -1.496583  | 0.11820617  |
| TBK1.DN.48HRS_UP                                                 | -1.4548373 | 0.1605833   |
| PRC2_EED_UP.V1_DN                                                | -1.4498048 | 0.15365516  |
| HOXA9_DN.V1_DN                                                   | -1.4448105 | 0.14754823  |
| AKT_UP.V1_UP                                                     | -1.4445903 | 0.13650045  |
| KRAS.DF.V1_DN                                                    | -1.4204334 | 0.15955879  |
| VEGF_A_UP.V1_DN                                                  | -1.4046097 | 0.17073005  |
| SRC_UP.V1_DN                                                     | -1.4029921 | 0.16195261  |
| RB_P107_DN.V1_UP                                                 | -1.3950583 | 0.16331598  |
| ATF2_S_UP.V1_UP                                                  | -1.3431537 | 0.22962077  |
| HALLMARK_MYC_TARGETS_V1                                          | -1.7091912 | 0.08825651  |
| HALLMARK_GLYCOLYSIS                                              | -1.7054101 | 0.04642232  |
| HALLMARK_E2F_TARGETS                                             | -1.6513934 | 0.058375258 |
| HALLMARK_G2M_CHECKPOINT                                          | -1.6233176 | 0.059379343 |
| HALLMARK_MITOTIC_SPINDLE                                         | -1.6223651 | 0.047601152 |
| HALLMARK_MYC_TARGETS_V2                                          | -1.6140976 | 0.045118697 |
| HALLMARK_SPERMATOGENESIS                                         | -1.6038322 | 0.042395268 |
| HALLMARK_UNFOLDED_PROTEIN_RESPONSE                               | -1.5728132 | 0.052223798 |
| HALLMARK_MTORC1_SIGNALING                                        | -1.5488518 | 0.058601476 |

Table S3 Genesets enriched in VEGFA high ANGPTL4 high tertile

| GENESET NAME                                                                                                                | NES       | FDR q-val |
|-----------------------------------------------------------------------------------------------------------------------------|-----------|-----------|
| PID_HIF2PATHWAY                                                                                                             | -1.811154 | 0.238873  |
| ELVIDGE_HYPOXIA_BY_DMOG_UP                                                                                                  | -1.806168 | 0.240767  |
| HIRSCH_CELLULAR_TRANSFORMATION_SIGNATURE_UP                                                                                 | -1.800771 | 0.243971  |
| RICKMAN_TUMOR_DIFFERENTIATED_WELL_VS_POORLY_DN                                                                              | -1.79809  | 0.242221  |
| KIM_HYPOXIA                                                                                                                 | -1.797158 | 0.233925  |
| PELLICCIOTTA_HDAC_IN_ANTIGEN_PRESENTATION_UP                                                                                | -1.794306 | 0.231431  |
| ELVIDGE_HYPOXIA_UP                                                                                                          | -1.793161 | 0.224889  |
| QI_HYPOXIA                                                                                                                  | -1.786008 | 0.235042  |
| PID_HIF1_TFPATHWAY                                                                                                          | -1.785188 | 0.228817  |
| KANG_AR_TARGETS_DN                                                                                                          | -1.782701 | 0.227144  |
| PODAR_RESPONSE_TO_ADAPHOSTIN_UP                                                                                             | -1.779968 | 0.226127  |
| ELVIDGE_HIF1A_AND_HIF2A_TARGETS_DN                                                                                          | -1.779936 | 0.218718  |
| DITTMER_PTHLH_TARGETS_DN                                                                                                    | -1.77378  | 0.226989  |
| MAHADEVAN_RESPONSE_TO_MP470_DN                                                                                              | -1.771714 | 0.224788  |
| MARTORIATI_MDM4_TARGETS_NEUROEPITHELIUM_UP                                                                                  | -1.765514 | 0.233951  |
| ELVIDGE_HIF1A_TARGETS_DN                                                                                                    | -1.764823 | 0.228395  |
| GROSS_HIF1A_TARGETS_DN                                                                                                      | -1.758559 | 0.237537  |
| GARGALOVIC_RESPONSE_TO_OXIDIZED_PHOSPHOLIPIDS_BLUE_UP                                                                       | -1.757936 | 0.23248   |
| REACTOME_PYRIMIDINE_METABOLISM                                                                                              | -1.753255 | 0.237152  |
| DAUER_STAT3_TARGETS_UP                                                                                                      | -1.752495 | 0.232595  |
| CAVARD_LIVER_CANCER_MALIGNANT_VS_BENIGN                                                                                     | -1.750528 | 0.231796  |
| LEONARD_HYPOXIA                                                                                                             | -1.750389 | 0.226204  |
| TAKEDA_TARGETS_OF_NUP98_HOXA9_FUSION_3D_DN                                                                                  | -1.747921 | 0.226675  |
| GROSS_HYPOXIA_VIA_ELK3_ONLY_UP                                                                                              | -1.746167 | 0.225091  |
| BIOCARTA_GCR_PATHWAY                                                                                                        | -1.746016 | 0.220279  |
| FARDIN_HYPOXIA_11                                                                                                           | -1.745928 | 0.215425  |
| PLASARI_TGFB1_TARGETS_10HR_UP                                                                                               | -1.743212 | 0.217042  |
| CROONQUIST_STROMAL_STIMULATION_UP                                                                                           | -1.742853 | 0.213083  |
| SEMENZA_HIF1_TARGETS                                                                                                        | -1.734573 | 0.229189  |
| KOBAYASHI_RESPONSE_TO_ROMIDEPSIN                                                                                            | -1.734571 | 0.224414  |
| PID_UPA_UPAR_PATHWAY                                                                                                        | -1.732858 | 0.224501  |
| NAM_FYD5_TARGETS_DN                                                                                                         | -1.731743 | 0.222468  |
| WANG_METHYLATED_IN_BREAST_CANCER                                                                                            | -1.731324 | 0.219126  |
| PID_INTEGRIN3_PATHWAY                                                                                                       | -1.728718 | 0.221438  |
| SARTIPY_NORMAL_AT_INSULIN_RESISTANCE_UP                                                                                     | -1.725766 | 0.224562  |
| AKL_HTLV1_INFECTION_UP                                                                                                      | -1.72506  | 0.222085  |
| BURTON_ADIPOGENESIS_PEAK_AT_2HR                                                                                             | -1.724443 | 0.219744  |
| PID_FRA_PATHWAY                                                                                                             | -1.722772 | 0.219341  |
| JI_RESPONSE_TO_FSH_DN                                                                                                       | -1.720696 | 0.220252  |
| SANA_RESPONSE_TO_IFNG_DN                                                                                                    | -1.718162 | 0.223146  |
| SAGIV_CD24_TARGETS_DN                                                                                                       | -1.718052 | 0.21966   |
| CHEN_LUNG_CANCER_SURVIVAL                                                                                                   | -1.716152 | 0.22002   |
| MARCHINI TRABECTEDIN_RESISTANCE_DN                                                                                          | -1.714682 | 0.219731  |
| MIYAGAWA_TARGETS_OF_EWSR1_ETS_FUSIONS_DN                                                                                    | -1.71343  | 0.219017  |
| PID_VEGFR1_PATHWAY                                                                                                          | -1.711147 | 0.220278  |
| GROSS_ELK3_TARGETS_DN                                                                                                       | -1.709241 | 0.220602  |
| DAZARD_RESPONSE_TO_UV_SCC_UP                                                                                                | -1.707366 | 0.222385  |
| GROSS_HYPOXIA_VIA_ELK3_DN                                                                                                   | -1.706984 | 0.220343  |
| AZARE_STAT3_TARGETS                                                                                                         | -1.706527 | 0.218031  |
| ZHOU_TNF_SIGNALING_30MIN                                                                                                    | -1.706312 | 0.215495  |
| WOTTON_RUNX_TARGETS_UP                                                                                                      | -1.705903 | 0.212959  |
| PUIFFE_INVASION_INHIBITED_BY_ASCITES_DN                                                                                     | -1.704523 | 0.212905  |
| KASLER_HDAC7_TARGETS_1_DN                                                                                                   | -1.703264 | 0.212719  |
| WATANABE_RECTAL_CANCER_RADIOOTHERAPY_RESPONSIVE_DN                                                                          | -1.697506 | 0.222888  |
| KRIGE_AMINO_ACID_DEPRIVATION                                                                                                | -1.696857 | 0.221417  |
| TONKS_TARGETS_OF_RUNX1_RUNX1T1_FUSION_MONOCYTE_UP                                                                           | -1.694007 | 0.224486  |
| AMIT_EGF_RESPONSE_60_MCF10A                                                                                                 | -1.692932 | 0.22388   |
| TONKS_TARGETS_OF_RUNX1_RUNX1T1_FUSION_ERYTHROCYTE_UP                                                                        | -1.69083  | 0.225703  |
| JECHLINGER_EPITHELIAL_TO_MESENCHYMAL_TRANSITION_UP                                                                          | -1.689415 | 0.226278  |
| PEDERSEN_TARGETS_OF_611CTF_ISOFORM_OF_ERBB2                                                                                 | -1.689357 | 0.223728  |
| HENDRICKS_SMARCA4_TARGETS_UP                                                                                                | -1.688643 | 0.222745  |
| REACTOME_UNFOLDED_PROTEIN_RESPONSE                                                                                          | -1.685346 | 0.227808  |
| REACTOME_BIOSYNTHESIS_OF_THE_N_GLYCAN_PRECURSOR_DOLICHOL_LIPID_LINKED_OLIGOSACCHARIDE_LLO_AND_TRANSFER_TO_A_NASCENT_PROTEIN | -1.684594 | 0.226973  |
| VERRECCHIA_EARLY_RESPONSE_TO_TGFB1                                                                                          | -1.683257 | 0.227604  |
| MARTORIATI_MDM4_TARGETS_FETAL_LIVER_UP                                                                                      | -1.682513 | 0.22658   |
| LIN_MELANOMA_COPY_NUMBER_DN                                                                                                 | -1.682185 | 0.224685  |
| GHANDHI_DIRECT_IRRADIATION_UP                                                                                               | -1.681181 | 0.224263  |
| REACTOME_A_TETRASACCHARIDE_LINKER_SEQUENCE_IS_REQUIRED_FOR_GAG_SYNTHESIS                                                    | -1.67749  | 0.23052   |
| HUMMERICH_SKIN_CANCER_PROGRESSION_UP                                                                                        | -1.676948 | 0.229138  |
| WILSON_PROTEASES_AT_TUMOR_BONE_INTERFACE_UP                                                                                 | -1.676364 | 0.227894  |
| SATO_SILENCED_BY_DEACETYLATION_IN_PANCREATIC_CANCER                                                                         | -1.676138 | 0.22576   |
| ROZANOV_MMP14_TARGETS_SUBSET                                                                                                | -1.673376 | 0.229423  |
| SHEPARD_CRUSH_AND_BURN_MUTANT_UP                                                                                            | -1.672988 | 0.227687  |
| REACTOME ASPARAGINE_N_LINKED_GLYCOSYLATION                                                                                  | -1.672964 | 0.225223  |
| PID_SYNDECAN_2_PATHWAY                                                                                                      | -1.671131 | 0.227248  |
| SILIGAN_TARGETS_OF_EWS_FLI1_FUSION_DN                                                                                       | -1.670104 | 0.227116  |
| MATTHEWS_AP1_TARGETS                                                                                                        | -1.669819 | 0.225318  |
| NAKAMURA_ADIPOGENESIS_EARLY_UP                                                                                              | -1.667806 | 0.227899  |
| BERENJENO_ROCK_SIGNALING_NOT_VIA_RHOA_UP                                                                                    | -1.667803 | 0.225555  |
| TOOKER_GEMCITABINE_RESISTANCE_DN                                                                                            | -1.666829 | 0.225343  |

|                                                          |           |          |
|----------------------------------------------------------|-----------|----------|
| NIKOLSKY_BREAST_CANCER_8Q12_Q22_AMPLICON                 | -1.666008 | 0.224968 |
| SESTO_RESPONSE_TO_UV_C6                                  | -1.66372  | 0.22787  |
| REACTOME_PERK_REGULATED_GENE_EXPRESSION                  | -1.66242  | 0.228624 |
| WANG_SMARCE1_TARGETS_DN                                  | -1.660794 | 0.230372 |
| BIOCARTA_GSK3_PATHWAY                                    | -1.659641 | 0.230735 |
| XU_HGF_SIGNALING_NOT_VIA_AKT1_6HR                        | -1.659189 | 0.229621 |
| SMITH_TERT_TARGETS_UP                                    | -1.656373 | 0.234067 |
| PID_AP1_PATHWAY                                          | -1.653227 | 0.239699 |
| NAKAMURA_ADIPOGENESIS_LATE_DN                            | -1.652722 | 0.238569 |
| VERRECCHIA_RESPONSE_TO_TGFB1_C1                          | -1.651594 | 0.238801 |
| WILLERT_WNT_SIGNALING                                    | -1.651256 | 0.237242 |
| IZADPANAH_STEM_CELL_ADIPOSE_VS_BONE_UP                   | -1.651244 | 0.235114 |
| AMIT_EGF_RESPONSE_40_MCF10A                              | -1.647548 | 0.241294 |
| PETROVA_ENDOTHELIUM_LYMPHATIC_VS_BLOOD_DN                | -1.647239 | 0.239964 |
| HAHTOLA_MYCOSIS_FUNGOIDES_CD4_UP                         | -1.646703 | 0.239061 |
| KIM_WT1_TARGETS_12HR_DN                                  | -1.645148 | 0.240527 |
| CHARAFE_BREAST_CANCER_LUMINAL_VS_MESENCHYMAL_DN          | -1.644051 | 0.24125  |
| GAUSSMANN_MLL_AF4_FUSION_TARGETS_E_UP                    | -1.642824 | 0.241939 |
| REACTOME_GLUCOSE_METABOLISM                              | -1.642635 | 0.240339 |
| JIANG_TIP30_TARGETS_UP                                   | -1.639845 | 0.244789 |
| KIM_WT1_TARGETS_8HR_UP                                   | -1.637772 | 0.24753  |
| MIKKELSEN_MEF_LCP_WITH_H3K4ME3                           | -1.637095 | 0.247195 |
| SEIDEN_ONCOGENESIS_BY_MET                                | -1.636223 | 0.247609 |
| DALESSIO_TSA_RESPONSE                                    | -1.635592 | 0.247009 |
| KAN_RESPONSE_TO_ARSENIC_TRIOXIDE                         | -1.634894 | 0.246481 |
| KYNG_ENVIRONMENTAL_STRESS_RESPONSE_UP                    | -1.634535 | 0.245321 |
| CEBALLOS_TARGETS_OF_TP53_AND_MYC_UP                      | -1.632933 | 0.246934 |
| CASTELLANO_NRAS_TARGETS_UP                               | -1.632723 | 0.245535 |
| NAKAMURA_ADIPOGENESIS_EARLY_DN                           | -1.632051 | 0.245207 |
| WANG_CLIM2_TARGETS_DN                                    | -1.631979 | 0.243476 |
| GHANDHI_BYSTANDER_IRRADIATION_UP                         | -1.63161  | 0.242326 |
| PID_INTEGRINS_PATHWAY                                    | -1.629935 | 0.24451  |
| DITTMER_PTHLH_TARGETS_UP                                 | -1.629634 | 0.243412 |
| JIANG_VHL_TARGETS                                        | -1.629314 | 0.242473 |
| MOOTHA_PGC                                               | -1.629201 | 0.240913 |
| DAZARD_RESPONSE_TO_UV_NHEK_UP                            | -1.627756 | 0.242379 |
| PRAMOONJAGO_SOX4_TARGETS_UP                              | -1.627111 | 0.242071 |
| BIOCARTA_CDMAC_PATHWAY                                   | -1.625929 | 0.242997 |
| WOOD_EBV_EBNA1_TARGETS_DN                                | -1.625801 | 0.241585 |
| NABA_ECM_REGULATORS                                      | -1.625416 | 0.240579 |
| GERY_CEBP_TARGETS                                        | -1.624289 | 0.241586 |
| NAGASHIMA_NRG1_SIGNALING_UP                              | -1.624025 | 0.240374 |
| AMIT_SERUM_RESPONSE_60_MCF10A                            | -1.622438 | 0.242456 |
| HALMOS_CEBPA_TARGETS_UP                                  | -1.622281 | 0.241059 |
| MISHRA_CARCINOMA_ASSOCIATED_FIBROBLAST_UP                | -1.621987 | 0.240001 |
| CROMER_TUMORIGENESIS_UP                                  | -1.620458 | 0.241877 |
| HERNANDEZ_MITOTIC_ARREST_BY_DOCETAXEL_1_DN               | -1.619695 | 0.242059 |
| REACTOME_CHONDROITIN_SULFATE_DERMATAN_SULFATE_METABOLISM | -1.619089 | 0.241813 |
| HUANG_FOXA2_TARGETS_DN                                   | -1.618361 | 0.241657 |
| PYEON_CANCER_HEAD_AND_NECK_VS_CERVICAL_DN                | -1.6182   | 0.240266 |
| KIM_PTEN_TARGETS_UP                                      | -1.617686 | 0.239836 |
| HUANG_DASATINIB_RESISTANCE_UP                            | -1.615335 | 0.243379 |
| GENTILE_UV_RESPONSE_CLUSTER_D6                           | -1.614715 | 0.243078 |
| MCDOWELL_ACUTE_LUNG_INJURY_UP                            | -1.611458 | 0.249149 |
| SWEET_KRAS_TARGETS_UP                                    | -1.611384 | 0.247722 |
| VERRECCHIA_DELAYED_RESPONSE_TO_TGFB1                     | -1.601154 | 0.249935 |
| BROWNE_HCMV_INFECTION_16HR_DN                            | -1.601069 | 0.248596 |
| WANG_CISPLATIN_RESPONSE_AND_XPC_DN                       | -1.600852 | 0.247614 |
| BOUDOUKHA_BOUND_BY_IGF2BP2                               | -1.599835 | 0.248586 |
| KRIEG_HYPOXIA_VIA_KDM3A                                  | -1.599524 | 0.247854 |
| BURTON_ADIPOGENESIS_9                                    | -1.59901  | 0.247735 |
| TAKAO_RESPONSE_TO_UVB_RADIATION_DN                       | -1.598815 | 0.246734 |
| REACTOME_ACTIVATION_OF_GENES_BY_ATF4                     | -1.598211 | 0.246779 |
| SARTIPY_BLUNTED_BY_INSULIN_RESISTANCE_UP                 | -1.597353 | 0.247361 |
| SCHOEN_NFKB_SIGNALING                                    | -1.596819 | 0.246808 |
| GUENTHER_GROWTH_SPHERICAL_VS_ADHERENT_DN                 | -1.595691 | 0.247939 |
| WEINMANN_ADAPTATION_TO_HYPOXIA_DN                        | -1.595232 | 0.247665 |
| BLALOCK_ALZHEIMERS_DISEASE_INCIPIENT_DN                  | -1.59517  | 0.246445 |
| NEMETH_INFLAMMATORY_RESPONSE_LPS_UP                      | -1.594949 | 0.245545 |
| HIZUKA_LIVER_CANCER_PROGRESSION_L1_G1_UP                 | -1.594588 | 0.245107 |
| DAZARD_UV_RESPONSE_CLUSTER_G28                           | -1.594343 | 0.244181 |
| ZWANG_CLASS_3_TRANSIENTLY_INDUCED_BY_EGF                 | -1.593621 | 0.244346 |
| LINDVALL_IMMORTALIZED_BY_TERT_DN                         | -1.592545 | 0.245421 |
| PID_TOLL_ENDOGENOUS_PATHWAY                              | -1.592309 | 0.244674 |
| KEGG_ALANINE_ASPARTATE_AND_GLUTAMATE_METABOLISM          | -1.591956 | 0.244102 |
| MAGRANGEAS_MULTIPLE_MYELOMA_IGG_VS_IGA_UP                | -1.590967 | 0.244709 |
| QJ_PLASMACYTOMA_DN                                       | -1.590899 | 0.243542 |
| WINZEN_DEGRADED_VIA_KHSRP                                | -1.590082 | 0.243958 |
| BERENJENO_TRANSFORMED_BY_RHOA_FOREVER_DN                 | -1.59006  | 0.242724 |
| GROSS_HYPOXIA_VIA_HIF1A_DN                               | -1.590015 | 0.241588 |
| AZARE_NEOPLASTIC_TRANSFORMATION_BY_STAT3_UP              | -1.589129 | 0.242405 |
| REACTOME_EXTRACELLULAR_MATRIX_ORGANIZATION               | -1.588023 | 0.243506 |

|                                                                                  |           |          |
|----------------------------------------------------------------------------------|-----------|----------|
| REACTOME_PTM_GAMMA_CARBOXYLATION_HYPUSINE_FORMATION_AND_ARYLSULFATASE_ACTIVATION | -1.587761 | 0.242957 |
| TERAMOTO_OPN_TARGETS_CLUSTER_7                                                   | -1.586572 | 0.244381 |
| SMIRNOV_RESPONSE_TO_IR_2HR_UP                                                    | -1.585994 | 0.244316 |
| VERHAAK_GLIOMASTOMA_MESENCHYMAL                                                  | -1.585822 | 0.243463 |
| KIM_WT1_TARGETS_UP                                                               | -1.585816 | 0.242238 |
| BIOCARTA_IL1R_PATHWAY                                                            | -1.582693 | 0.248076 |
| MA_PITUITARY_FETAL_VS_ADULT_UP                                                   | -1.582506 | 0.247292 |
| BIOCARTA_NTHI_PATHWAY                                                            | -1.582161 | 0.246771 |
| PID_INTEGRIN1_PATHWAY                                                            | -1.581949 | 0.246152 |
| TSUNODA_CISPLATIN_RESISTANCE_UP                                                  | -1.58134  | 0.24622  |
| HOWLIN_PUBERTAL_MAMMARY_GLAND                                                    | -1.581188 | 0.245396 |
| JEON_SMAD6_TARGETS_UP                                                            | -1.580268 | 0.24614  |
| GENTILE_UV_HIGH_DOSE_UP                                                          | -1.57923  | 0.247239 |
| REACTOME_PYRUVATE_METABOLISM                                                     | -1.578761 | 0.24723  |
| DAVICIONI_TARGETS_OF_PAX_FOXO1_FUSIONS_UP                                        | -1.576951 | 0.249962 |
| REACTOME_METABOLISM_OF_PROTEINS                                                  | -1.576468 | 0.249684 |
| VERRECCHIA_RESPONSE_TO_TGFB1_C2                                                  | -1.576278 | 0.248933 |
| VART_KSHV_INFECTION_ANGIOGENIC_MARKERS_UP                                        | -1.576208 | 0.247906 |
| BROWNE_HCMV_INFECTION_48HR_DN                                                    | -1.575462 | 0.24845  |
| WANG_RESPONSE_TO_BEXAROTENE_DN                                                   | -1.575297 | 0.247632 |
| NIELSEN_MALIGNANT_FIBROUS_HISTIOCYTOMA_UP                                        | -1.575201 | 0.246667 |
| AMIT_EGF_RESPONSE_120_HELA                                                       | -1.574625 | 0.246921 |
| GENTILE_UV_HIGH_DOSE_DN                                                          | -1.574316 | 0.246298 |
| UEDA_CENTRAL_CLOCK                                                               | -1.57423  | 0.245387 |
| SUH_COEXPRESSED_WITH_ID1_AND_ID2_UP                                              | -1.573392 | 0.245938 |
| CHARAFE_BREAST_CANCER_BASAL_VS_MESENCHYMAL_DN                                    | -1.572949 | 0.245668 |
| SESTO_RESPONSE_TO_UV_C3                                                          | -1.572622 | 0.245236 |
| PEART_HDAC_PROLIFERATION_CLUSTER_UP                                              | -1.572487 | 0.244476 |
| INGA_TP53_TARGETS                                                                | -1.571044 | 0.246441 |
| CSR_EARLY_UP.V1_UP                                                               | -1.785736 | 0.030531 |
| SIRNA_EIF4G1_DN                                                                  | -1.726126 | 0.041519 |
| RB_DN.V1_DN                                                                      | -1.716326 | 0.033475 |
| PDGF_UP.V1_UP                                                                    | -1.706604 | 0.029438 |
| KRAS.DF.V1_UP                                                                    | -1.665539 | 0.049377 |
| EGFR_UP.V1_UP                                                                    | -1.660951 | 0.043474 |
| MTOR_UP.N4.V1_UP                                                                 | -1.646406 | 0.046493 |
| MEL18_DN.V1_UP                                                                   | -1.641766 | 0.04441  |
| BMI1_DN_MEL18_DN.V1_UP                                                           | -1.633553 | 0.044661 |
| STK33_NOMO_UP                                                                    | -1.624269 | 0.044039 |
| TBK1.DF_UP                                                                       | -1.623078 | 0.04078  |
| BMI1_DN.V1_UP                                                                    | -1.614035 | 0.041951 |
| CAHOY_ASTROGLIAL                                                                 | -1.600553 | 0.046407 |
| ALK_DN.V1_UP                                                                     | -1.583374 | 0.053814 |
| STK33_UP                                                                         | -1.550065 | 0.07565  |
| KRAS.LUNG.BREAST_UP.V1_UP                                                        | -1.545011 | 0.076372 |
| KRAS.600.LUNG.BREAST_UP.V1_UP                                                    | -1.532806 | 0.08308  |
| HOXA9_DN.V1_DN                                                                   | -1.530081 | 0.080906 |
| LEF1_UP.V1_UP                                                                    | -1.529117 | 0.077237 |
| RB_P107_DN.V1_DN                                                                 | -1.525352 | 0.077189 |
| PTEN_DN.V2_UP                                                                    | -1.520292 | 0.078124 |
| ESC_V6.5_UP_EARLY.V1_DN                                                          | -1.517577 | 0.078173 |
| ESC_V6.5_UP_LATE.V1_DN                                                           | -1.50074  | 0.087962 |
| PIGF_UP.V1_UP                                                                    | -1.498262 | 0.086186 |
| IL15_UP.V1_UP                                                                    | -1.496073 | 0.084635 |
| MEK_UP.V1_UP                                                                     | -1.487859 | 0.088206 |
| ATF2_S_UP.V1_DN                                                                  | -1.477446 | 0.094064 |
| ESC_J1_UP_EARLY.V1_DN                                                            | -1.476992 | 0.091264 |
| ATF2_UP.V1_DN                                                                    | -1.466047 | 0.09872  |
| TGFB_UP.V1_UP                                                                    | -1.464846 | 0.096319 |
| E2F1_UP.V1_DN                                                                    | -1.446417 | 0.108925 |
| ERB2_UP.V1_UP                                                                    | -1.443488 | 0.108366 |
| NRL_DN.V1_DN                                                                     | -1.436932 | 0.1117   |
| BCAT_BILD_ET_AL_DN                                                               | -1.433027 | 0.112451 |
| ATM_DN.V1_UP                                                                     | -1.421278 | 0.120314 |
| AKT_UP_MTOR_DN.V1_DN                                                             | -1.411211 | 0.127254 |
| CAHOY_ASTROCYTIC                                                                 | -1.404445 | 0.131561 |
| RAF_UP.V1_UP                                                                     | -1.39782  | 0.135523 |
| CYCLIN_D1_KE_V1_UP                                                               | -1.397166 | 0.132823 |
| ATF2_S_UP.V1_UP                                                                  | -1.389184 | 0.138475 |
| HINATA_NFKB_IMMU_INF                                                             | -1.38759  | 0.136337 |
| CORDENONSI_YAP_CONSERVED_SIGNATURE                                               | -1.37971  | 0.141934 |
| CRX_DN.V1_DN                                                                     | -1.359293 | 0.163639 |
| JNK_DN.V1_UP                                                                     | -1.358175 | 0.161408 |
| P53_DN.V2_UP                                                                     | -1.356281 | 0.160041 |
| PRC2_EZH2_UP.V1_DN                                                               | -1.35617  | 0.156637 |
| EIF4E_DN                                                                         | -1.347626 | 0.164094 |
| CTIP_DN.V1_UP                                                                    | -1.342268 | 0.167885 |
| RB_P130_DN.V1_DN                                                                 | -1.336313 | 0.172933 |
| STK33_SKM_UP                                                                     | -1.332356 | 0.175161 |
| KRAS.LUNG_UP.V1_UP                                                               | -1.32985  | 0.174539 |
| RELA_DN.V1_UP                                                                    | -1.328346 | 0.17368  |
| AKT_UP_MTOR_DN.V1_UP                                                             | -1.326953 | 0.172328 |

|                                            |           |          |
|--------------------------------------------|-----------|----------|
| TBK1.DN.48HRS_UP                           | -1.324225 | 0.172125 |
| ESC_J1_UP_LATE.V1_UP                       | -1.323605 | 0.169746 |
| VEGF_A_UP.V1_DN                            | -1.319332 | 0.172867 |
| HOXA9_DN.V1_UP                             | -1.31807  | 0.171419 |
| CYCLIN_D1_UP.V1_DN                         | -1.315227 | 0.17231  |
| CRX_NRL_DN.V1_DN                           | -1.3073   | 0.179161 |
| ESC_J1_UP_LATE.V1_DN                       | -1.303942 | 0.180387 |
| PKCA_DN.V1_DN                              | -1.287897 | 0.199483 |
| MTOR_UP.V1_UP                              | -1.286096 | 0.198148 |
| TBK1.DF_DN                                 | -1.281352 | 0.200934 |
| P53_DN.V1_UP                               | -1.27955  | 0.20013  |
| KRAS.PROSTATE_UP.V1_DN                     | -1.270423 | 0.209795 |
| CYCLIN_D1_UP.V1_UP                         | -1.269589 | 0.207493 |
| KRAS.BREAST_UP.V1_UP                       | -1.266572 | 0.208673 |
| AKT_UP.V1_DN                               | -1.258184 | 0.217185 |
| IL21_UP.V1_UP                              | -1.255436 | 0.217755 |
| CAMP_UP.V1_DN                              | -1.254969 | 0.21533  |
| TGFB_UP.V1_DN                              | -1.25291  | 0.215455 |
| SNF5_DN.V1_DN                              | -1.251383 | 0.214541 |
| IL2_UP.V1_UP                               | -1.245352 | 0.219787 |
| PDGF_ERK_DN.V1_DN                          | -1.245306 | 0.216831 |
| KRAS.600_UP.V1_UP                          | -1.24524  | 0.213968 |
| SRC_UP.V1_DN                               | -1.24216  | 0.215232 |
| KRAS.50_UP.V1_UP                           | -1.234205 | 0.22377  |
| EIF4E_UP                                   | -1.229649 | 0.227801 |
| STK33_SKM_DN                               | -1.224801 | 0.232561 |
| CSR_LATE_UP.V1_DN                          | -1.224555 | 0.22993  |
| KRAS.300_UP.V1_UP                          | -1.221503 | 0.231309 |
| YAP1_UP                                    | -1.216989 | 0.236086 |
| RPS14_DN.V1_UP                             | -1.213897 | 0.23763  |
| KRAS.50_UP.V1_DN                           | -1.213507 | 0.235513 |
| NFE2L2.V2                                  | -1.208545 | 0.239413 |
| KRAS.KIDNEY_UP.V1_DN                       | -1.206016 | 0.240305 |
| PRC1_BMI_UP.V1_DN                          | -1.20335  | 0.241282 |
| HALLMARK_HYPOXIA                           | -1.864924 | 0.03245  |
| HALLMARK_GLYCOLYSIS                        | -1.792324 | 0.040907 |
| HALLMARK_EPITHELIAL_MESENCHYMAL_TRANSITION | -1.724908 | 0.058499 |
| HALLMARK_MTORC1_SIGNALING                  | -1.686427 | 0.060807 |
| HALLMARK_ANGIOGENESIS                      | -1.628105 | 0.096024 |
| HALLMARK_UNFOLDED_PROTEIN_RESPONSE         | -1.612943 | 0.094081 |
| HALLMARK_PROTEIN_SECRETION                 | -1.605944 | 0.08554  |
| HALLMARK_TNFA_SIGNALING_VIA_NFKB           | -1.544121 | 0.127834 |
| HALLMARK_REACTIVE_OXIGEN_SPECIES_PATHWAY   | -1.532094 | 0.126472 |
| HALLMARK_ADIPOGENESIS                      | -1.523917 | 0.122702 |
| HALLMARK_P53_PATHWAY                       | -1.513178 | 0.12054  |
| HALLMARK_CHOLESTEROL_HOMEOSTASIS           | -1.513136 | 0.110495 |
| HALLMARK_XENOBIOTIC_METABOLISM             | -1.493636 | 0.119289 |
| HALLMARK_UV_RESPONSE_UP                    | -1.445863 | 0.157744 |
| HALLMARK_COAGULATION                       | -1.436924 | 0.158927 |
| HALLMARK_APOPTOSIS                         | -1.432929 | 0.152092 |
| HALLMARK_UV_RESPONSE_DN                    | -1.420904 | 0.153646 |
| HALLMARK_INFLAMMATORY_RESPONSE             | -1.406125 | 0.159011 |
| HALLMARK_KRAS_SIGNALING_UP                 | -1.400521 | 0.157409 |
| HALLMARK_FATTY_ACID_METABOLISM             | -1.331599 | 0.219652 |

Table S4. Genesets enriched in VEGFA low ANGPTL4 high tertile

| GENESET NAME                                                                   | NES        | FDR q-val  |
|--------------------------------------------------------------------------------|------------|------------|
| GROSS_HIF1A_TARGETS_DN                                                         | -1.8443651 | 0.24109855 |
| PID_PDGFRA_PATHWAY                                                             | -1.8424854 | 0.21224721 |
| HSIAO_LIVER_SPECIFIC_GENES                                                     | -1.815934  | 0.24080268 |
| REACTOME_PLATELET_HOMEOSTASIS                                                  | -1.8154833 | 0.21792485 |
| PID_S1P_S1P3_PATHWAY                                                           | -1.8101345 | 0.21412712 |
| BIOCARTA_PPARG_PATHWAY                                                         | -1.8013473 | 0.22404866 |
| NIKOLSKY_BREAST_CANCER_20Q11_AMPLICON                                          | -1.8003933 | 0.2095655  |
| PID_ANGIOPLETIN_RECEPTOR_PATHWAY                                               | -1.7915208 | 0.21978052 |
| NING_CHRONIC_OBSTRUCTIVE_PULMONARY_DISEASE_DN                                  | -1.7880073 | 0.21553473 |
| REACTOME_FATTY_ACID_TRIACYLGLYCEROL_AND_KETONE_BODY_METABOLISM                 | -1.7835512 | 0.21410172 |
| LEE_LIVER_CANCER                                                               | -1.782874  | 0.20313992 |
| BIOCARTA_INTRINSIC_PATHWAY                                                     | -1.7790973 | 0.20180961 |
| SU_LIVER                                                                       | -1.7784125 | 0.1928648  |
| REACTOME_RESPONSE_TO_ELEVATED_PLATELET_CYTOSOLIC_CA2                           | -1.7778606 | 0.18470854 |
| CHIANG_LIVER_CANCER_SUBCLASS_PROLIFERATION_DN                                  | -1.7734149 | 0.1863303  |
| REACTOME_FORMATION_OF_FIBRIN_CLOT_CLOTTING_CASCADE                             | -1.7715566 | 0.18242967 |
| BURTON_ADIPOGENESIS_6                                                          | -1.7704753 | 0.17710276 |
| BOYVAULT_LIVER_CANCER_SUBCLASS_G3_DN                                           | -1.7695391 | 0.17205001 |
| REACTOME_DARPP_32_EVENTS                                                       | -1.7662141 | 0.17416325 |
| TIAN_TNF_SIGNALING_NOT_VIA_NFKB                                                | -1.7637495 | 0.17287476 |
| ZHANG_TLX_TARGETS_UP                                                           | -1.7595502 | 0.17607504 |
| ZHANG_TLX_TARGETS_36HR_UP                                                      | -1.759197  | 0.17038877 |
| CHEN_LVAD_SUPPORT_OF_FAILING_HEART_UP                                          | -1.755325  | 0.17291203 |
| BILANGES_SERUM_SENSITIVE_VIA_TSC1                                              | -1.7528987 | 0.17324422 |
| LEE_CALORIE_RESTRICTION_MUSCLE_UP                                              | -1.7525083 | 0.16854538 |
| MCBRYAN_PUBERTAL_BREAST_4_5WK_DN                                               | -1.7524015 | 0.16340478 |
| REACTOME_CGMP_EFFECTS                                                          | -1.7466819 | 0.16973634 |
| REACTOME_TRANSCRIPTIONAL_REGULATION_OF_WHITE_ADIPOCYTE_DIFFERENTIATION         | -1.7457305 | 0.16623631 |
| BIOCARTA_CXCR4_PATHWAY                                                         | -1.7435292 | 0.16588448 |
| NAKAMURA_ADIPOGENESIS_EARLY_UP                                                 | -1.7428967 | 0.16247098 |
| LEIN_ASTROCYTE_MARKERS                                                         | -1.742692  | 0.1583819  |
| NAKAMURA_ADIPOGENESIS_LATE_UP                                                  | -1.7415421 | 0.15622047 |
| IIZUKA_LIVER_CANCER_PROGRESSION_L1_G1_UP                                       | -1.7411698 | 0.15303385 |
| ADDYA_ERYTHROID_DIFFERENTIATION_BY_HEMIN                                       | -1.7410276 | 0.14961527 |
| SEMENZA_HIF1_TARGETS                                                           | -1.7395804 | 0.14835718 |
| REACTOME_MAPK_TARGETS_NUCLEAR_EVENTS_MEDIATED_BY_MAP_KINASES                   | -1.7337732 | 0.15538155 |
| PID_HIF1_TF_PATHWAY                                                            | -1.7337731 | 0.15176801 |
| SATO_SILENCED_BY_DEACETYLATION_IN_PANCREATIC_CANCER                            | -1.7325575 | 0.15056647 |
| PID_S1P_S1P2_PATHWAY                                                           | -1.7315507 | 0.14928035 |
| BIOCARTA_SHH_PATHWAY                                                           | -1.728913  | 0.15113701 |
| KEGG_FATTY_ACID_METABOLISM                                                     | -1.7288942 | 0.14799671 |
| REACTOME_INTEGRATION_OF_ENERGY_METABOLISM                                      | -1.7251407 | 0.15141389 |
| MANALO_HYPOXIA_UP                                                              | -1.7250444 | 0.14847776 |
| CAIRO_HEPATOBLASTOMA_DN                                                        | -1.7206181 | 0.15313576 |
| WEST_ADRENOCORTICAL_TUMOR_DN                                                   | -1.7203629 | 0.1505748  |
| REACTOME_NFKB_AND_MAP_KINASES_ACTIVATION_MEDIATED_BY_TLR4_SIGNALING_REPERTOIRE | -1.7185144 | 0.15148672 |
| BIOCARTA_GCR_PATHWAY                                                           | -1.716414  | 0.15232915 |
| ZAMORA_NOS2_TARGETS_DN                                                         | -1.7135286 | 0.1553424  |
| REACTOME_PLATELET_ACTIVATION_SIGNALING_AND_AGGREGATION                         | -1.7128474 | 0.15365966 |
| KYNG_DNA_DAMAGE_BY_4NQO_OR_GAMMA_RADIATION                                     | -1.7120118 | 0.15253718 |
| CHEMELLO_SOLEUS_VS_EDL_MYOFIBERS_UP                                            | -1.712001  | 0.1498989  |
| PID_S1P_S1P1_PATHWAY                                                           | -1.7118495 | 0.14768372 |
| HOSHIDA_LIVER_CANCER_SUBCLASS_S3                                               | -1.7108127 | 0.14683962 |
| REACTOME_INTRINSIC_PATHWAY                                                     | -1.7103912 | 0.14515224 |
| KEEN_RESPONSE_TO_ROSIGLITAZONE_UP                                              | -1.7103399 | 0.14284939 |
| CHIARADONNA_NEOPLASTIC_TRANSFORMATION_KRAS_DN                                  | -1.7100817 | 0.1410894  |
| PID_HNF3B_PATHWAY                                                              | -1.7096428 | 0.13961096 |
| BIOCARTA_VEGF_PATHWAY                                                          | -1.7096175 | 0.13746619 |
| SMITH_TERT_TARGETS_DN                                                          | -1.7092152 | 0.13595694 |
| VARELA_ZMPSTE24_TARGETS_UP                                                     | -1.7056226 | 0.14042683 |
| SCHRAETS_MLL_TARGETS_DN                                                        | -1.705307  | 0.13886839 |
| REACTOME_G_ALPHA_S_SIGNALING_EVENTS                                            | -1.7047976 | 0.13767174 |
| YAMASHITA_LIVER_CANCER_STEM_CELL_DN                                            | -1.7016157 | 0.14125484 |
| FALVELLA_SMOKERS_WITH_LUNG_CANCER                                              | -1.7001617 | 0.14181004 |
| MAGRANGEAS_MULTIPLE_MYELOMA_IGG_VS_IGA_UP                                      | -1.6973886 | 0.14419752 |
| GRUETZMANN_PANCREATIC_CANCER_DN                                                | -1.6968478 | 0.1433853  |
| BROWNE_HCMV_INFECTION_18HR_DN                                                  | -1.6936765 | 0.14672254 |
| HUMMERICH_BENIGN_SKIN_TUMOR_DN                                                 | -1.6929384 | 0.14589882 |
| MIKKELSEN_IPS_HCP_WITH_H3_UNMETHYLATED                                         | -1.6918199 | 0.1458248  |
| LEE_AGING_MUSCLE_UP                                                            | -1.6912856 | 0.14494304 |
| REACTOME_REGULATION_OF_INSULIN_SECRETION                                       | -1.6903385 | 0.14457637 |
| HARRIS_HYPOXIA                                                                 | -1.6895224 | 0.14424856 |
| GUO_HEX_TARGETS_DN                                                             | -1.6880722 | 0.1447184  |
| NOJIMA_SFRP2_TARGETS_UP                                                        | -1.6872749 | 0.14425838 |
| HOUSTIS_ROS                                                                    | -1.6853838 | 0.14566924 |

|                                                         |            |            |
|---------------------------------------------------------|------------|------------|
| HUMMERICH_SKIN_CANCER_PROGRESSION_DN                    | -1.6852819 | 0.14406197 |
| VARELA_ZMPSTE24_TARGETS_DN                              | -1.6846081 | 0.1435982  |
| CADWELL_ATG16L1_TARGETS_UP                              | -1.6838205 | 0.14312707 |
| REACTOME_LIPID_DIGESTION_MOBILIZATION_AND_TRANSPORT     | -1.6836036 | 0.14176638 |
| REACTOME_MYD88_MAL_CASCADE_INITIATED_ON_PLASMA_MEMBRANE | -1.6824107 | 0.1423872  |
| HOFFMANN_IMMATURE_TO_MATURE_B_LYMPHOCYTE_DN             | -1.6820059 | 0.14156647 |
| KEGG_COMPLEMENT_AND_COAGULATION_CASCADES                | -1.6809171 | 0.1414096  |
| REACTOME_ERK_MAPK_TARGETS                               | -1.6803166 | 0.14071354 |
| ICHIBA_GRAFT_VERSUS_HOST_DISEASE_35D_DN                 | -1.6791589 | 0.14097899 |
| AMIT_DELAYED_EARLY_GENES                                | -1.6786357 | 0.14045541 |
| KINSEY_TARGETS_OF_EWSR1_FLII_FUSION_DN                  | -1.6767671 | 0.14177366 |
| MALONEY_RESPONSE_TO_17AAG_UP                            | -1.6715306 | 0.14939612 |
| PANGAS_TUMOR_SUPPRESSION_BY_SMAD1_AND_SMAD5_UP          | -1.6702702 | 0.14984325 |
| NING_CHRONIC_OBSTRUCTIVE_PULMONARY_DISEASE_UP           | -1.6692346 | 0.15009302 |
| NADLER_OBESITY_DN                                       | -1.6686621 | 0.14935122 |
| RUAN_RESPONSE_TO_TNF_DN                                 | -1.6682756 | 0.14859696 |
| THEODOROU_MAMMARY_TUMORIGENESIS                         | -1.6680368 | 0.14759004 |
| BURTON_ADIPOGENESIS_PEAK_AT_2HR                         | -1.6669847 | 0.14788249 |
| GESERICK_TERT_TARGETS_DN                                | -1.6667778 | 0.1468144  |
| LANDIS_ERBB2_BREAST_TUMORS_324_DN                       | -1.6664814 | 0.14596027 |
| BONOME_OVARIAN_CANCER_SURVIVAL_SUBOPTIMAL_DEBULKING     | -1.665529  | 0.1463038  |
| KEGG_ADIPOCYTOKINE_SIGNALING_PATHWAY                    | -1.6646074 | 0.14638214 |
| IIZUKA_LIVER_CANCER_PROGRESSION_G2_G3_UP                | -1.6639743 | 0.14611787 |
| CAVARD_LIVER_CANCER_MALIGNANT_VS_BENIGN                 | -1.6637378 | 0.14509852 |
| REACTOME_METABOLISM_OF_LIPIDS_AND_LIPOPROTEINS          | -1.6622057 | 0.14651571 |
| LIM_MAMMARY_STEM_CELL_UP                                | -1.6611812 | 0.14699878 |
| IWANAGA_CARCINOGENESIS_BY_KRAS_PTEN_DN                  | -1.6611301 | 0.1457324  |
| LEE_LIVER_CANCER_MYC_E2F1_DN                            | -1.6610217 | 0.14455155 |
| LEE_LIVER_CANCER_SURVIVAL_UP                            | -1.6595428 | 0.1457332  |
| URS_ADIPOCYTE_DIFFERENTIATION_UP                        | -1.6594226 | 0.14463934 |
| WENG_POR_TARGETS_GLOBAL_DN                              | -1.65868   | 0.14433974 |
| MCDOWELL_ACUTE_LUNG_INJURY_DN                           | -1.6582246 | 0.14369057 |
| ELVIDGE_HYPOXIA_UP                                      | -1.6577232 | 0.14335124 |
| WOO_LIVER_CANCER_RECURRENCE_DN                          | -1.6575474 | 0.14246172 |
| SHETH_LIVER_CANCER_VS_TXNIP_LOSS_PAM4                   | -1.6565411 | 0.14317273 |
| KYNG_DNA_DAMAGE_BY_4NQO                                 | -1.6558181 | 0.142898   |
| SWEET_LUNG_CANCER_KRAS_DN                               | -1.6548936 | 0.14298148 |
| KEGG_TRYPTOPHAN_METABOLISM                              | -1.6546041 | 0.14221287 |
| JOHANSSON_BRAIN_CANCER_EARLY_VS_LATE_DN                 | -1.6545696 | 0.14109632 |
| REACTOME_GLYCOGEN_BREAKDOWN_GLYCOGENOLYSIS              | -1.6541651 | 0.14052577 |
| AMIT_SERUM_RESPONSE_20_MCF10A                           | -1.6534387 | 0.14054468 |
| ZHU_CMV_ALL_DN                                          | -1.6528848 | 0.14031494 |
| ACEVEDO_LIVER_TUMOR_VS_NORMAL_ADJACENT_TISSUE_DN        | -1.6519612 | 0.14080854 |
| KEGG_PPAR_SIGNALING_PATHWAY                             | -1.6518086 | 0.13986413 |
| BURTON_ADIPOGENESIS_9                                   | -1.6511246 | 0.13999568 |
| WANG_ADIPOGENIC_GENES_REPRESSED_BY_SIRT1                | -1.6500152 | 0.14038204 |
| DAUER_STAT3_TARGETS_UP                                  | -1.6498827 | 0.13948432 |
| KEGG_TYROSINE_METABOLISM                                | -1.6497152 | 0.13863501 |
| CROONQUIST_STROMAL_STIMULATION_UP                       | -1.6497084 | 0.13757508 |
| CHIARADONNA_NEOPLASTIC_TRANSFORMATION_CDC25_DN          | -1.6492859 | 0.13702868 |
| YAMAZAKI_TCEB3_TARGETS_UP                               | -1.6484696 | 0.1371008  |
| REACTOME_PPARA_ACTIVATES_GENE_EXPRESSION                | -1.6467127 | 0.1388094  |
| LA_MEN1_TARGETS                                         | -1.6464779 | 0.13808997 |
| ZHU_CMV_8_HR_DN                                         | -1.6456665 | 0.13833176 |
| LEE_LIVER_CANCER_DENA_DN                                | -1.6453758 | 0.13781151 |
| WESTON_VEGFA_TARGETS_6HR                                | -1.645268  | 0.13694139 |
| BIOCARTA_CK1_PATHWAY                                    | -1.644308  | 0.13759896 |
| RUAN_RESPONSE_TO_TNF_TROGLITAZONE_DN                    | -1.6431736 | 0.13837215 |
| VALK_AML_CLUSTER_13                                     | -1.642939  | 0.13779394 |
| WANG_CISPLATIN_RESPONSE_AND_XPC_DN                      | -1.6419053 | 0.13831355 |
| DURAND_STROMA_S_UP                                      | -1.6412948 | 0.13829635 |
| ZHENG_GLIOMASTOMA_PLASTICITY_DN                         | -1.6397364 | 0.13957529 |
| XU_HGF_SIGNALING_NOT_VIA_AKT1_6HR                       | -1.6383979 | 0.14071311 |
| TSENG_IRS1_TARGETS_DN                                   | -1.6370507 | 0.1421439  |
| REACTOME_PHASE1_FUNCTIONALIZATION_OF_COMPOUNDS          | -1.636107  | 0.1426178  |
| GERHOLD_ADIPOGENESIS_UP                                 | -1.6360432 | 0.14173311 |
| MOREAUX_B_LYMPHOCYTE_MATURATION_BY_TACI_UP              | -1.6359878 | 0.1408514  |
| GENTILE_UV_LOW_DOSE_DN                                  | -1.6346426 | 0.1418428  |
| ACEVEDO_LIVER_CANCER_DN                                 | -1.6344997 | 0.14112523 |
| CONCANNON_APOPTOSIS_BY_EPOXOMICIN_UP                    | -1.6343921 | 0.14040932 |
| KIM_HYPOXIA                                             | -1.6339701 | 0.14010331 |
| DAZARD_UV_RESPONSE_CLUSTER_G4                           | -1.6330912 | 0.14055015 |
| PID_IL6_7_PATHWAY                                       | -1.6322366 | 0.14096427 |
| LEIN_PONS_MARKERS                                       | -1.6321876 | 0.14010583 |
| BERENJENO_ROCK_SIGNALING_NOT_VIA_RHOA_UP                | -1.6320487 | 0.1394315  |
| KEGG_GLYCEROLIPID_METABOLISM                            | -1.6299546 | 0.14164512 |
| ROME_INSULIN_TARGETS_IN_MUSCLE_UP                       | -1.6298825 | 0.14094035 |

|                                                                                       |            |            |
|---------------------------------------------------------------------------------------|------------|------------|
| ELVIDGE_HYPOXIA_BY_DMOG_UP                                                            | -1.629581  | 0.140597   |
| REACTOME_LIPOPROTEIN_METABOLISM                                                       | -1.6294917 | 0.1398153  |
| NAGASHIMA_EGF_SIGNALING_UP                                                            | -1.629454  | 0.139011   |
| LINDGREN_BLADDER_CANCER_HIGH_RECURRENCE                                               | -1.6283514 | 0.13977273 |
| KIM_GERMINAL_CENTER_T_HELPER_DN                                                       | -1.6283087 | 0.13896634 |
| KAAB_HEART_ATRIUM_VS_VENTRICLE_UP                                                     | -1.6273807 | 0.13979062 |
| LI_CISPLATIN_RESISTANCE_DN                                                            | -1.6271983 | 0.13917314 |
| GRADE_COLON_VS_RECTAL_CANCER_UP                                                       | -1.6271667 | 0.13838488 |
| BIOCARTA_NGF_PATHWAY                                                                  | -1.6270982 | 0.13761507 |
| PID_ER_NONGENOMIC_PATHWAY                                                             | -1.6269178 | 0.13705887 |
| PID_ARF6_PATHWAY                                                                      | -1.6266935 | 0.13660227 |
| MOOHTA_FFA_OXYDATION                                                                  | -1.6263806 | 0.13618828 |
| LEE_LIVER_CANCER_CIPROFIBRATE_UP                                                      | -1.6263208 | 0.13552015 |
| ELVIDGE_HIF1A_AND_HIF2A_TARGETS_DN                                                    | -1.6257651 | 0.13560008 |
| BROWNE_HCMV_INFECTION_30MIN_UP                                                        | -1.6255178 | 0.13516112 |
| ACEVEDO_NORMAL_TISSUE_ADJACENT_TO_LIVER_TUMOR_DN                                      | -1.6246325 | 0.13560958 |
| FARDIN_HYPOXIA_11                                                                     | -1.6241081 | 0.13554502 |
| PID_RXR_VDR_PATHWAY                                                                   | -1.6236587 | 0.13547191 |
| KEGG_FOCAL_ADHESION                                                                   | -1.6230894 | 0.13554154 |
| WESTON_VEGFA_TARGETS                                                                  | -1.6230761 | 0.13479427 |
| YAO_HOXA10_TARGETS_VIA_PROGESTERONE_UP                                                | -1.6225034 | 0.13491629 |
| REACTOME_TRAF6_MEDIATED_INDUCTION_OF_NFKB_AND_MAP_KINASES_UPON_TLR7_8_OR_9_ACTIVATION | -1.6222895 | 0.13444327 |
| BURTON_ADIPOGENESIS_PEAK_AT_OHR                                                       | -1.6222466 | 0.13374154 |
| REACTOME_TRIGLYCERIDE_BIOSYNTHESIS                                                    | -1.6219878 | 0.13334823 |
| KEGG_PHENYLALANINE_METABOLISM                                                         | -1.6219265 | 0.1327202  |
| BIOCARTA_CARDIACEGF_PATHWAY                                                           | -1.6216944 | 0.1322937  |
| REACTOME_BIOLOGICAL_OXIDATIONS                                                        | -1.6216598 | 0.13160634 |
| REACTOME_AMINE_LIGAND_BINDING_RECEPTORS                                               | -1.6211325 | 0.1317096  |
| BIOCARTA_P53HYPOXIA_PATHWAY                                                           | -1.6210742 | 0.13109528 |
| VART_KSHV_INFECTION_ANGIOGENIC_MARKERS_DN                                             | -1.6196795 | 0.13220294 |
| MARCHINI TRABECTEDIN_RESISTANCE_UP                                                    | -1.6194019 | 0.1318747  |
| FRIDMAN_IMMORTALIZATION_DN                                                            | -1.6192354 | 0.13137725 |
| PID_VEGFR1_PATHWAY                                                                    | -1.6189893 | 0.13105312 |
| LEE_LIVER_CANCER_ACOX1_DN                                                             | -1.6189315 | 0.13044624 |
| MATZUK_CENTRAL_FOR_FEMALE_FERTILITY                                                   | -1.6187798 | 0.12998553 |
| BERTUCCI_MEDULLARY_VS_DUCTAL_BREAST_CANCER_DN                                         | -1.6183858 | 0.12982988 |
| MOOHTA_GLYCOGEN_METABOLISM                                                            | -1.6170697 | 0.13092999 |
| REACTOME_HDL_MEDIATED_LIPID_TRANSPORT                                                 | -1.616586  | 0.13098854 |
| RAMASWAMY_METASTASIS_DN                                                               | -1.616     | 0.13116588 |
| WANG_MLL_TARGETS                                                                      | -1.6159687 | 0.13051887 |
| REACTOME_DEVELOPMENTAL_BIOLOGY                                                        | -1.6134101 | 0.13342907 |
| ZHU_CMV_24_HR_DN                                                                      | -1.6133771 | 0.13278754 |
| CORRE_MULTIPLE_MYELOMA_UP                                                             | -1.6132168 | 0.13236359 |
| SEKI_INFLAMMATORY_RESPONSE_LPS_DN                                                     | -1.6127813 | 0.13217682 |
| LEE_LIVER_CANCER_MYC_DN                                                               | -1.612451  | 0.1319975  |
| REACTOME_CLASS_B_2_SECRETIN_FAMILY_RECEPTORS                                          | -1.6105727 | 0.13398421 |
| BROWNE_HCMV_INFECTION_48HR_DN                                                         | -1.6103003 | 0.13382266 |
| KEGG_PRION_DISEASES                                                                   | -1.6095951 | 0.13422598 |
| WINTER_HYPOXIA_METAGENE                                                               | -1.6095706 | 0.13361926 |
| HOSHIDA_LIVER_CANCER_SURVIVAL_DN                                                      | -1.6092379 | 0.13341667 |
| REACTOME_NUCLEAR_EVENTS_KINASE_AND_TRANSCRIPTION_FACTOR_ACTIVATION                    | -1.60912   | 0.13295937 |
| BURTON_ADIPOGENESIS_7                                                                 | -1.6090901 | 0.13236561 |
| REN_ALVEOLAR_RHABDOMYOSARCOMA_DN                                                      | -1.6089213 | 0.13200435 |
| BIOCARTA_AMI_PATHWAY                                                                  | -1.608809  | 0.13159141 |
| ELVIDGE_HIF1A_TARGETS_DN                                                              | -1.608773  | 0.13103865 |
| BURTON_ADIPOGENESIS_1                                                                 | -1.6078436 | 0.13176012 |
| PID_TCR_CALCIIUM_PATHWAY                                                              | -1.6076267 | 0.13142076 |
| MIKKELSEN_ES_HCP_WITH_H3K27ME3                                                        | -1.607153  | 0.1314549  |
| HOEGERKORP_CD44_TARGETS_DIRECT_UP                                                     | -1.6067181 | 0.13141985 |
| BIOCARTA_NFAT_PATHWAY                                                                 | -1.606462  | 0.13118128 |
| LIU_LIVER_CANCER                                                                      | -1.6060839 | 0.13108462 |
| YAO_TEMPORAL_RESPONSE_TO_PROGESTERONE_CLUSTER_1                                       | -1.6044279 | 0.13271075 |
| BAELDE_DIABETIC_NEPHROPATHY_UP                                                        | -1.6037526 | 0.13313103 |
| BIOCARTA_SPRY_PATHWAY                                                                 | -1.6026592 | 0.13413735 |
| VALK_AML_CLUSTER_12                                                                   | -1.6023442 | 0.13395955 |
| RUIZ_TNC_TARGETS_UP                                                                   | -1.6022915 | 0.13349195 |
| GYORFFY_DOXORUBICIN_RESISTANCE                                                        | -1.6018674 | 0.1334764  |
| REACTOME_GLUCOSE_METABOLISM                                                           | -1.6004782 | 0.13483818 |
| BURTON_ADIPOGENESIS_4                                                                 | -1.600286  | 0.1346326  |
| REACTOME_SMOOTH_MUSCLE_CONTRACTION                                                    | -1.6002812 | 0.13404211 |
| NABA_ECM_GLYCOPROTEINS                                                                | -1.6001047 | 0.13369842 |
| KAAB_HEART_ATRIUM_VS_VENTRICLE_DN                                                     | -1.5981022 | 0.13593139 |
| TOMLINS_PROSTATE_CANCER_DN                                                            | -1.5976022 | 0.13600221 |
| IGLESIAS_E2F_TARGETS_UP                                                               | -1.5969251 | 0.136398   |
| RODRIGUES NTN1_AND_DCC_TARGETS                                                        | -1.5969167 | 0.13581613 |
| DELACROIX_RARG_BOUND_MEF                                                              | -1.5966308 | 0.13567342 |
| GAUSSMANN_MLL_AF4_FUSION_TARGETS_E_UP                                                 | -1.5963725 | 0.13540226 |

|                                                          |            |            |
|----------------------------------------------------------|------------|------------|
| MCDOWELL_ACUTE_LUNG_INJURY_UP                            | -1.5961334 | 0.13509181 |
| NIELSEN_MALIGNANT_FIBROUS_HISTIOCYTOMA_UP                | -1.5957248 | 0.13500133 |
| DORSAM_HOXA9_TARGETS_DN                                  | -1.5952985 | 0.13504837 |
| REACTOME_RIP_MEDIATED_NFKB_ACTIVATION_VIA_DAI            | -1.5952498 | 0.13459247 |
| BOGNI_TREATMENT_RELATED_MYELOID_LEUKEMIA_UP              | -1.5952176 | 0.13406354 |
| KANG_IMMORTALIZED_BY_TERT_DN                             | -1.5950872 | 0.13366112 |
| GRADE_COLON_CANCER_DN                                    | -1.5941255 | 0.13448095 |
| LEIN_MIDBRAIN_MARKERS                                    | -1.5940363 | 0.13404845 |
| KEGG_METABOLISM_OF_XENOBIOTICS_BY_CYTOCHROME_P450        | -1.5937943 | 0.13384257 |
| REACTOME_P130CAS_LINKAGE_TO_MAPK_SIGNALING_FOR_INTEGRINS | -1.5937114 | 0.13337755 |
| KEGG_ARACHIDONIC_ACID_METABOLISM                         | -1.5924696 | 0.13455744 |
| GUENTHER_GROWTH_SPHERICAL_VS_ADHERENT_DN                 | -1.5923439 | 0.13415466 |
| KEGG_GLYCEROPHOSPHOLIPID_METABOLISM                      | -1.5922172 | 0.13379848 |
| HAN_JNK_SIGNALING_DN                                     | -1.5917736 | 0.1338426  |
| CAIRO_LIVER_DEVELOPMENT_DN                               | -1.5916898 | 0.13340989 |
| GARGALOVIC_RESPONSE_TO_OXIDIZED_PHOSPHOLIPIDS_RED_DN     | -1.5907828 | 0.13399282 |
| ZHANG_TLX_TARGETS_60HR_UP                                | -1.5907154 | 0.13355799 |
| MIKKELSEN_NPC_LCP_WITH_H3K4ME3                           | -1.5905654 | 0.13317092 |
| REACTOME_INCRETIN_SYNTHESIS_SECRETION_AND_INACTIVATION   | -1.5902851 | 0.13297321 |
| WAMUNYOKOLI_OVARIAN_CANCER_GRADES_1_2_DN                 | -1.5902456 | 0.13251222 |
| KEGG_NEUROACTIVE_LIGAND_RECEPTOR_INTERACTION             | -1.5893582 | 0.13329549 |
| CAIRO_HEPATOBLASTOMA_CLASSES_DN                          | -1.5885566 | 0.13385524 |
| KEGG_GLYCOLYSIS_GLUCCONEOGENESIS                         | -1.5881442 | 0.13389117 |
| REACTOME_MUSCLE_CONTRACTION                              | -1.5872471 | 0.13470516 |
| MIKKELSEN_IPS_WITH_HCP_H3K27ME3                          | -1.5866657 | 0.13489069 |
| PLASARI_TGFB1_TARGETS_1HR_UP                             | -1.5848737 | 0.13672997 |
| REACTOME_INTERACTION_BETWEEN_L1_AND_ANKYRINS             | -1.5847661 | 0.13633867 |
| BOQUEST_STEM_CELL_CULTURED_VS_FRESH_UP                   | -1.5842723 | 0.13645351 |
| ZHU_SKIL_TARGETS_UP                                      | -1.584118  | 0.13619973 |
| VART_KSHV_INFECTION_ANGIOGENIC_MARKERS_UP                | -1.5838943 | 0.13598792 |
| LANDIS_ERBB2_BREAST_TUMORS_65_DN                         | -1.5838739 | 0.1354999  |
| MIYAGAWA_TARGETS_OF_EWSR1_ETS_FUSIONS_DN                 | -1.583825  | 0.13507453 |
| MCGOWAN_RSP6_TARGETS_UP                                  | -1.5827004 | 0.1360738  |
| LANDIS_BREAST_CANCER_PROGRESSION_DN                      | -1.5811641 | 0.1378581  |
| MOREAUX_MULTIPLE_MYELOMA_BY_TACI_UP                      | -1.5804185 | 0.13847442 |
| SANA_TNF_SIGNALING_DN                                    | -1.5803602 | 0.13802567 |
| BURTON_ADIPOGENESIS_5                                    | -1.5793453 | 0.13907534 |
| ST_WNT_BETA_CATENIN_PATHWAY                              | -1.5785574 | 0.13967031 |
| DELYS_THYROID_CANCER_DN                                  | -1.5783647 | 0.13944258 |
| HUNSBERGER_EXERCISE_REGULATED_GENES                      | -1.5782006 | 0.13917765 |
| REACTOME_ACTIVATED_TLR4_SIGNALLING                       | -1.5781562 | 0.13872539 |
| KEGG_PRIMARY_BILE_ACID_BIOSYNTHESIS                      | -1.578036  | 0.13841082 |
| LEE_LIVER_CANCER_MYC_TGFA_DN                             | -1.5776654 | 0.13846579 |
| URS_ADIPOCYTE_DIFFERENTIATION_DN                         | -1.5764875 | 0.139624   |
| CHIARADONNA_NEOPLASTIC_TRANSFORMATION_KRAS_CDC25_DN      | -1.5760328 | 0.13976008 |
| GUILLAUMOND_KLF10_TARGETS_DN                             | -1.5758514 | 0.13951106 |
| REACTOME_MAP_KINASE_ACTIVATION_IN_TLR_CASCADE            | -1.5755508 | 0.13946828 |
| PID_INTEGRIN_A9B1_PATHWAY                                | -1.5753376 | 0.1391711  |
| ODONNELL_METASTASIS_UP                                   | -1.5751237 | 0.13893051 |
| GARGALOVIC_RESPONSE_TO_OXIDIZED_PHOSPHOLIPIDS_BLUE_DN    | -1.5748165 | 0.13894972 |
| KEGG_DRUG_METABOLISM_CYTOCHROME_P450                     | -1.5746228 | 0.13874851 |
| BIDUS_METASTASIS_DN                                      | -1.5745444 | 0.13843349 |
| BROWNE_HCMV_INFECTION_24HR_DN                            | -1.574398  | 0.13813035 |
| LE_EGR2_TARGETS_DN                                       | -1.5739294 | 0.13828173 |
| REACTOME_ABC_FAMILY_PROTEINS_MEDIATED_TRANSPORT          | -1.5734714 | 0.13838165 |
| BIOCARTA_MET_PATHWAY                                     | -1.5728328 | 0.13881224 |
| RAY_TUMORIGENESIS_BY_ERBB2_CDC25A_DN                     | -1.5725735 | 0.13871355 |
| BOQUEST_STEM_CELL_DN                                     | -1.5720127 | 0.13898133 |
| WESTON_VEGFA_TARGETS_12HR                                | -1.5719184 | 0.13864508 |
| ROZANOV_MMP14_TARGETS_SUBSET                             | -1.5711981 | 0.13921806 |
| WANG_NEOPLASTIC_TRANSFORMATION_BY_CCND1_MYC              | -1.5710232 | 0.13903637 |
| LEE_LIVER_CANCER_E2F1_DN                                 | -1.5707972 | 0.13885133 |
| INGRAM_SHH_TARGETS_UP                                    | -1.5703725 | 0.13896869 |
| REACTOME_SYNTHESIS_OF_PA                                 | -1.570212  | 0.13868453 |
| KERLEY_RESPONSE_TO_CISPLATIN_UP                          | -1.5700097 | 0.13851473 |
| LIN_TUMOR_ESCAPE_FROM_IMMUNE_ATTACK                      | -1.5699791 | 0.13810095 |
| BIOCARTA_ECM_PATHWAY                                     | -1.5697423 | 0.13793384 |
| VERRECCHIA_EARLY_RESPONSE_TO_TGFB1                       | -1.5697407 | 0.1374786  |
| PID_AR_NONGENOMIC_PATHWAY                                | -1.5692298 | 0.13766256 |
| REACTOME_TRIF_MEDIATED_TLR3_SIGNALING                    | -1.5682485 | 0.13834238 |
| VERNOCHET_ADIPOGENESIS                                   | -1.5676008 | 0.13872747 |
| XU_GH1_EXOGENOUS_TARGETS_UP                              | -1.5675374 | 0.13836223 |
| WEST_ADRENOCORTICAL_TUMOR_MARKERS_DN                     | -1.5665388 | 0.1393949  |
| CLASPER_LYMPHATIC_VESSELS_DURING_METASTASIS_UP           | -1.5664389 | 0.1390739  |
| KATSANOUELAVL1_TARGETS_UP                                | -1.5647728 | 0.14081602 |
| ONDER_CDH1_TARGETS_2_UP                                  | -1.5646479 | 0.14049749 |
| SCHLESINGER_H3K27ME3_IN_NORMAL_AND_METHYLATED_IN_CANCER  | -1.5637643 | 0.14129312 |

|                                                                         |            |            |
|-------------------------------------------------------------------------|------------|------------|
| LIU_SMARCA4_TARGETS                                                     | -1.5632027 | 0.14163527 |
| KYNG_RESPONSE_TO_H2O2                                                   | -1.5630581 | 0.14133283 |
| REACTOME_THROMBIN_SIGNALING_THROUGH_PROTEINASE_ACTIVATED_RECEPTORS_PARS | -1.5627922 | 0.141224   |
| LANDIS_ERBB2_BREAST_PRENEOPLASTIC_DN                                    | -1.5615206 | 0.14264202 |
| SWEET_KRAS_TARGETS_UP                                                   | -1.5615095 | 0.14220864 |
| MCBRYAN_PUBERTAL_BREAST_6_7WK_UP                                        | -1.5606099 | 0.143001   |
| BRACHAT_RESPONSE_TO_CISPLATIN                                           | -1.5605367 | 0.1426432  |
| ALONSO_METASTASIS_DN                                                    | -1.5601096 | 0.14277747 |
| ACEVEDO_FGFR1_TARGETS_IN_PROSTATE_CANCER_MODEL_DN                       | -1.5585372 | 0.14433642 |
| BIOCARTA_IL6_PATHWAY                                                    | -1.5583447 | 0.14417487 |
| MIKKELSEN_MEF_LCP_WITH_H3K4ME3                                          | -1.558153  | 0.14395972 |
| BYSTRYKH_HEMATOPOIESIS_STEM_CELL_SCP2_QTL_TRANS                         | -1.5577526 | 0.14401534 |
| KONDO_EZH2_TARGETS                                                      | -1.557216  | 0.14422756 |
| BOQUEST_STEM_CELL_UP                                                    | -1.5568504 | 0.1443018  |
| REACTOME_GRB2_SOS_PROVIDES_LINKAGE_TO_MAPK_SIGNALING_FOR_INTERGRINS     | -1.5566782 | 0.14403519 |
| KAYO_CALORIE_RESTRICTION_MUSCLE_UP                                      | -1.5564446 | 0.14395852 |
| SCHLINGEMANN_SKIN_CARCINOGENESIS_TPA_DN                                 | -1.5561872 | 0.14389995 |
| CEBALLOS_TARGETS_OF_TP53_AND_MYC_UP                                     | -1.5552213 | 0.14477262 |
| BASSO_HAIRY_CELL_LEUKEMIA_UP                                            | -1.5552188 | 0.14433524 |
| MAHAJAN_RESPONSE_TO_IL1A_DN                                             | -1.5533799 | 0.14639936 |
| CHIANG_LIVER_CANCER_SUBCLASS_CTNNB1_UP                                  | -1.5532107 | 0.146197   |
| WANG_LSD1_TARGETS_DN                                                    | -1.5531672 | 0.1458042  |
| KEGG_PYRUVATE_METABOLISM                                                | -1.5528139 | 0.1458293  |
| RICKMAN_HEAD_AND_NECK_CANCER_F                                          | -1.5527221 | 0.14552464 |
| IZADPANAH_STEM_CELL_ADIPOSE_VS_BONE_DN                                  | -1.5520476 | 0.1459883  |
| WAMUNYOKOLI_OVARIAN_CANCER_LMP_DN                                       | -1.5515813 | 0.14615951 |
| LINDVALL_IMMORTALIZED_BY_TERT_DN                                        | -1.5512973 | 0.14616938 |
| REACTOME_NETRIN1_SIGNALING                                              | -1.55116   | 0.14590639 |
| NAKAJIMA_MAST_CELL                                                      | -1.5505525 | 0.14635319 |
| MIKKELSEN_ES_LCP_WITH_H3K4ME3                                           | -1.5484159 | 0.14887954 |
| TSENG_ADIPOGENIC_POTENTIAL_DN                                           | -1.5474167 | 0.14968204 |
| KEGG_ALPHA_LINOLENIC_ACID_METABOLISM                                    | -1.5473927 | 0.1492902  |
| WONG_ENDMETRIUM_CANCER_DN                                               | -1.5467988 | 0.14967972 |
| PID_INTEGRIN2_PATHWAY                                                   | -1.5465823 | 0.14953011 |
| KEGG_RETINOL_METABOLISM                                                 | -1.5461878 | 0.14962287 |
| WEINMANN_ADAPTATION_TO_HYPOXIA_UP                                       | -1.5459125 | 0.14958048 |
| BERENJENO_TRANSFORMED_BY_RHO_FOREVER_UP                                 | -1.5458833 | 0.14919029 |
| RUAN_RESPONSE_TO_TNF_TROGLITAZONE_UP                                    | -1.5455608 | 0.14918812 |
| CHEN_LVAD_SUPPORT_OF_FAILING_HEART_DN                                   | -1.5455474 | 0.1487904  |
| HU_ANGIOGENESIS_UP                                                      | -1.544874  | 0.1493297  |
| KEEN_RESPONSE_TO_ROSIGLITAZONE_DN                                       | -1.5447769 | 0.149031   |
| MCBRYAN_PUBERTAL_BREAST_3_4WK_DN                                        | -1.5446045 | 0.14883257 |
| REACTOME_COMPLEMENT_CASCADE                                             | -1.5444819 | 0.14860359 |
| REACTOME_GROWTH_HORMONE_RECEPTOR_SIGNALING                              | -1.5444645 | 0.14820163 |
| KANG_GLI3_TARGETS                                                       | -1.5443436 | 0.14793979 |
| MCBRYAN_PUBERTAL_BREAST_5_6WK_DN                                        | -1.5438105 | 0.14834668 |
| REACTOME_OPIOID_SIGNALING                                               | -1.5436695 | 0.14812559 |
| BROWNE_HCMV_INFECTION_2HR_UP                                            | -1.5434234 | 0.14806801 |
| DUNNE_TARGETS_OF_AML1_MTG8_FUSION_DN                                    | -1.5432388 | 0.14795883 |
| REACTOME_SIGNAL_AMPLIFICATION                                           | -1.5425242 | 0.14849526 |
| REACTOME_ABCA_TRANSPORTERS_IN_LIPID_HOMEOSTASIS                         | -1.5423622 | 0.1483198  |
| VERRECCHIA_RESPONSE_TO_TGFB1_C1                                         | -1.5423076 | 0.14799514 |
| RASHI_RESPONSE_TO_IONIZING_RADIATION_1                                  | -1.5422555 | 0.14765641 |
| GROSS_ELK3_TARGETS_DN                                                   | -1.5419627 | 0.1477708  |
| NABA_CORE_MATRISOME                                                     | -1.5419347 | 0.14735016 |
| GOLUB_ALL_VS_AML_DN                                                     | -1.5412475 | 0.1479846  |
| MCBRYAN_PUBERTAL_TGFB1_TARGETS_UP                                       | -1.5390368 | 0.15075263 |
| LINDGREN_BLADDER_CANCER_CLUSTER_2B                                      | -1.5388962 | 0.15057957 |
| BIOCARTA_RHO_PATHWAY                                                    | -1.538772  | 0.15034418 |
| TERAMOTO_OPN_TARGETS_CLUSTER_6                                          | -1.5385537 | 0.15026678 |
| BROWNE_HCMV_INFECTION_16HR_DN                                           | -1.5381105 | 0.1504018  |
| STEGER_ADIPOGENESIS_DN                                                  | -1.5380135 | 0.15012537 |
| KHETCHOUMIAN_TRIM24_TARGETS_UP                                          | -1.5374302 | 0.15046915 |
| MATZUK_SPERMATOGONIA                                                    | -1.5370431 | 0.15055113 |
| KEGG_HYPERTROPHIC_CARDIOMYOPATHY_HCM                                    | -1.5370406 | 0.15015417 |
| BURTON_ADIPOGENESIS_10                                                  | -1.5367703 | 0.15011555 |
| REACTOME_TOLL_RECEPTOR_CASCADES                                         | -1.536285  | 0.1504036  |
| MARCHINI TRABECTEDIN_RESISTANCE_DN                                      | -1.5354394 | 0.15117478 |
| PILON_KLF1_TARGETS_UP                                                   | -1.5353363 | 0.15088089 |
| PAPASPYRIDONOS_UNSTABLE_ATEROSCLEROTIC_PLAQUE_DN                        | -1.5350591 | 0.15091027 |
| SCHLESINGER_METHYLATED_DE_NOVO_IN_CANCER                                | -1.5342964 | 0.15144579 |
| CHENG_RESPONSE_TO_NICKEL_ACETATE                                        | -1.5342377 | 0.15116057 |
| PID_PTP1B_PATHWAY                                                       | -1.5336947 | 0.15144482 |
| SCHAEFFER_PROSTATE_DEVELOPMENT_6HR_UP                                   | -1.5334879 | 0.15131398 |
| SHIPP_DLCL_CURED_VS_FATAL_UP                                            | -1.5325474 | 0.15219374 |
| CHARAFE_BREAST_CANCER_BASAL_VS_MESENCHYMAL_DN                           | -1.5321258 | 0.15242578 |
| WATANABE_ULCERATIVE_COLITIS_WITH_CANCER_UP                              | -1.5318248 | 0.15245238 |

|                                                                                                                      |            |            |
|----------------------------------------------------------------------------------------------------------------------|------------|------------|
| KUNINGER_IGF1_VS_PDGF_TARGETS_DN                                                                                     | -1.5317309 | 0.15215935 |
| ZHANG_TARGETS_OF_EWSR1_FLI1_FUSION                                                                                   | -1.5304023 | 0.15372775 |
| PID_SYNDECAN_4_PATHWAY                                                                                               | -1.5300125 | 0.15383518 |
| PETRETTO_CARDIAC_HYPERTROPHY                                                                                         | -1.5298415 | 0.1537098  |
| AMIT_EGF_RESPONSE_40_HELA                                                                                            | -1.5292132 | 0.15419398 |
| GAUSSMANN_MLL_AF4_FUSION_TARGETS_A_DN                                                                                | -1.5291519 | 0.15387355 |
| HATADA_METHYLATED_IN_LUNG_CANCER_UP                                                                                  | -1.528255  | 0.15476054 |
| ABRAHAM_ALPC_VS_MULTIPLE_MYELOMA_UP                                                                                  | -1.5278554 | 0.15498604 |
| REACTOME_REGULATION_OF_INSULIN_LIKE_GROWTH_FACTOR_IGF_ACTIVITY_BY_INSULIN_LIKE_GROWTH_FACTOR_BINDING_PROTEINS_IGFBPS | -1.5274984 | 0.15514088 |
| AMIT_SERUM_RESPONSE_40_MCF10A                                                                                        | -1.526809  | 0.1557526  |
| REACTOME_ACYL_CHAIN_REMODELLING_OF_PC                                                                                | -1.5256443 | 0.15696019 |
| SASSON_RESPONSE_TO_FORSKOLIN_UP                                                                                      | -1.5254489 | 0.15685771 |
| ONDER_CDH1_SIGNALING_VIA_CTNNB1                                                                                      | -1.5247412 | 0.15746634 |
| SERVITJA_ISLET_HNF1A_TARGETS_UP                                                                                      | -1.5246806 | 0.15715905 |
| WESTON_VEGFA_TARGETS_3HR                                                                                             | -1.5245123 | 0.15698834 |
| VANDESLUIS_NORMAL_EMBRYOS_DN                                                                                         | -1.5244424 | 0.15669027 |
| ST_DIFFERENTIATION_PATHWAY_IN_PC12_CELLS                                                                             | -1.5242459 | 0.1565731  |
| CHIBA_RESPONSE_TO_TSA_UP                                                                                             | -1.5237724 | 0.15686305 |
| PICCALUGA_ANGIOIMMUNOBLASTIC_LYMPHOMA_UP                                                                             | -1.5232515 | 0.1571909  |
| KOKKINAKIS_METHIONINE_DEPRIVATION_96HR_UP                                                                            | -1.5231986 | 0.1568523  |
| BERENJENO_TRANSFORMED_BY_RHOA_REVERSIBLY_DN                                                                          | -1.5231019 | 0.15658896 |
| LEE_METASTASIS_AND_ALTERNATIVE_SPLICING_UP                                                                           | -1.5225958 | 0.15694818 |
| DAVICIONI_TARGETS_OF_PAX_FOXO1_FUSIONS_UP                                                                            | -1.5224668 | 0.15674289 |
| SCHURINGA_STATS5A_TARGETS_UP                                                                                         | -1.5216086 | 0.15756378 |
| BERENJENO_TRANSFORMED_BY_RHOA_DN                                                                                     | -1.5208905 | 0.1581103  |
| SASAI_RESISTANCE_TO NEOPLASTIC TRANSFORMATION                                                                        | -1.5208418 | 0.15780134 |
| KARLSSON_TGFB1_TARGETS_DN                                                                                            | -1.5206484 | 0.15769526 |
| PID_HIF2PATHWAY                                                                                                      | -1.5196334 | 0.15861708 |
| MAHADEVAN_RESPONSE_TO_MP470_DN                                                                                       | -1.5195425 | 0.15839723 |
| HOSHIDA_LIVER_CANCER_LATE_RECURRENCE_DN                                                                              | -1.5187643 | 0.15910594 |
| WARTERS_IR_RESPONSE_5GY                                                                                              | -1.518587  | 0.15899254 |
| BIOCARTA_IGF1MTOR_PATHWAY                                                                                            | -1.5185297 | 0.15868773 |
| JEPSEN_SMRT_TARGETS                                                                                                  | -1.5179387 | 0.15910295 |
| WANG_IMMORTALIZED_BY_HOXA9_AND_MEIS1_DN                                                                              | -1.5178539 | 0.15885252 |
| HILLION_HMGA1B_TARGETS                                                                                               | -1.5174487 | 0.15905622 |
| CHARAFE_BREAST_CANCER_LUMINAL_VS_MESENCHYMAL_DN                                                                      | -1.5174017 | 0.15878305 |
| REACTOME_ENDOGENOUS_STEROLS                                                                                          | -1.5173644 | 0.15848736 |
| YAO_TEMPORAL_RESPONSE_TO_PROGESTERONE_CLUSTER_0                                                                      | -1.5164993 | 0.1593061  |
| VANHARANTA_UTERINE_FIBROID_WITH_7Q_DELETION_DN                                                                       | -1.5161694 | 0.15935452 |
| KOHOUTEK_CCNT2_TARGETS                                                                                               | -1.516047  | 0.1591442  |
| LIEN_BREAST_CARCINOMA_METAPLASTIC                                                                                    | -1.5156584 | 0.1592772  |
| GROSS_HYPOXIA_VIA_ELK3_AND_HIF1A_UP                                                                                  | -1.5153879 | 0.15929201 |
| DARWICHE_PAPILLOMA_RISK_HIGH_DN                                                                                      | -1.515312  | 0.15901342 |
| RAO_BOUND_BY_SALL4_ISOFORM_A                                                                                         | -1.5151751 | 0.15881653 |
| ST_GRANULE_CELL_SURVIVAL_PATHWAY                                                                                     | -1.5150617 | 0.15857588 |
| ACOSTA_PROLIFERATION_INDEPENDENT_MYC_TARGETS_DN                                                                      | -1.514808  | 0.15857665 |
| LEIN_CHOROID_PLEXUS_MARKERS                                                                                          | -1.5137918 | 0.1596375  |
| MARKEY_RB1_CHRONIC_LOF_DN                                                                                            | -1.5137526 | 0.15932193 |
| BOYALT_LIVER_CANCER_SUBCLASS_G123_DN                                                                                 | -1.5136112 | 0.15911083 |
| MATTHEWS_AP1_TARGETS                                                                                                 | -1.5132239 | 0.15932484 |
| GERY_CEBP_TARGETS                                                                                                    | -1.5130686 | 0.15917903 |
| LIU_PROSTATE_CANCER_DN                                                                                               | -1.5126212 | 0.15945378 |
| BURTON_ADIPOGENESIS_2                                                                                                | -1.5124491 | 0.15932673 |
| MIKKELSEN_MCV6_HCP_WITH_H3K27ME3                                                                                     | -1.5119076 | 0.15974581 |
| REACTOME_ADP_SIGNALING_THROUGH_P2RY12                                                                                | -1.5115622 | 0.15987714 |
| FLECHNER_BIOPSY_KIDNEY_TRANSPLANT_REJECTED_VS_OK_DN                                                                  | -1.5114777 | 0.15967052 |
| HAHTOLA_MYCOSIS_FUNGOIDES_CD4_UP                                                                                     | -1.5114771 | 0.15931252 |
| SUH_COEXPRESSED_WITH_ID1_AND_ID2_UP                                                                                  | -1.5112964 | 0.15922736 |
| SCHURINGA_STATS5A_TARGETS_DN                                                                                         | -1.5108078 | 0.15951738 |
| LU_AGING_BRAIN_UP                                                                                                    | -1.5105631 | 0.15945439 |
| GENTILE_UV_RESPONSE_CLUSTER_D6                                                                                       | -1.5104545 | 0.15921885 |
| BERTUCCI_INVASIVE_CARCINOMA_DUCTAL_VS_LOBULAR_DN                                                                     | -1.5102012 | 0.1592513  |
| EHLERS_ANEUPLOIDY_UP                                                                                                 | -1.5095217 | 0.15987536 |
| ABBUD_LIF_SIGNALING_1_UP                                                                                             | -1.5094453 | 0.15965652 |
| LIU_BREAST_CANCER                                                                                                    | -1.5093019 | 0.15949973 |
| REACTOME_PLATELET_SENSITIZATION_BY_LDL                                                                               | -1.5087316 | 0.1599801  |
| ZHOU_TNF_SIGNALING_30MIN                                                                                             | -1.5086995 | 0.15966791 |
| PID_GLYPICAN_1PATHWAY                                                                                                | -1.5084796 | 0.15962058 |
| WOTTON_RUNX_TARGETS_UP                                                                                               | -1.508433  | 0.15933901 |
| GROSS_HYPOXIA_VIA_ELK3_ONLY_UP                                                                                       | -1.5080868 | 0.15945065 |
| RUAN_RESPONSE_TO_TROGLITAZONE_UP                                                                                     | -1.5076791 | 0.15970983 |
| REACTOME_NEGATIVE_REGULATION_OF_FGFR_SIGNALING                                                                       | -1.506922  | 0.16034645 |
| LIM_MAMMARY_LUMINAL_MATURE_DN                                                                                        | -1.5065182 | 0.16063188 |
| PID_LYSOPHOSPHOLIPID_PATHWAY                                                                                         | -1.5060083 | 0.16102539 |
| DORSEY_GAB2_TARGETS                                                                                                  | -1.5059296 | 0.16075785 |
| NAKAMURA_ADIPOGENESIS_EARLY_DN                                                                                       | -1.5057869 | 0.16064101 |
| REACTOME_G_PROTEIN_ACTIVATION                                                                                        | -1.5050644 | 0.16126238 |

|                                                                      |            |            |
|----------------------------------------------------------------------|------------|------------|
| VECCHI_GASTRIC_CANCER_EARLY_DN                                       | -1.5042851 | 0.1620051  |
| DAVICIONI_MOLECULAR_ARMS_VS_ERMS_DN                                  | -1.5038972 | 0.16217753 |
| MOROSSETTI_FACIOSCAPULOHUMERAL_MUSCULAR_DISTROPHY_UP                 | -1.5020267 | 0.16443568 |
| LIU_VAV3_PROSTATE_CARCINOGENESIS_UP                                  | -1.50164   | 0.16465111 |
| REACTOME_G_ALPHA_Q_SIGNALING_EVENTS                                  | -1.5013618 | 0.16469736 |
| BIOCARTA_IGF1_PATHWAY                                                | -1.4998142 | 0.16655928 |
| OSWALD_HEMATOPOIETIC_STEM_CELL_IN_COLLAGEN_GEL_UP                    | -1.4995713 | 0.16649519 |
| REACTOME_SYNTHESIS_OF_BILE_ACIDS_AND_BILE_SALTS                      | -1.4995452 | 0.16617753 |
| REACTOME_HEMOSTASIS                                                  | -1.4991678 | 0.16637023 |
| COATES_MACROPHAGE_M1_VS_M2_DN                                        | -1.4984705 | 0.16694337 |
| LABBE_TGFB1_TARGETS_UP                                               | -1.4981222 | 0.16709745 |
| WINNEPENNINCKX_MELANOMA_METASTASIS_DN                                | -1.4980752 | 0.16680099 |
| PEDRIOLI_MIR31_TARGETS_DN                                            | -1.4979409 | 0.16663232 |
| PID_AP1_PATHWAY                                                      | -1.4977416 | 0.16657263 |
| LEIN_LOCALIZED_TO_PROXIMAL_DENDRITES                                 | -1.4974496 | 0.16668259 |
| LEE_NEURAL_CREST_STEM_CELL_UP                                        | -1.4973013 | 0.16656259 |
| ZHANG_ANTIVIRAL_RESPONSE_TO_RIBAVIRIN_DN                             | -1.4968745 | 0.16691093 |
| BIOCARTA_TPO_PATHWAY                                                 | -1.4968271 | 0.16662145 |
| DANG_REGULATED_BY_MYC_DN                                             | -1.4965509 | 0.16662121 |
| MCGARVEY_SILENCED_BY_METHYLATION_IN_COLON_CANCER                     | -1.4962537 | 0.16664055 |
| WOOD_EBV_EBNA1_TARGETS_DN                                            | -1.49613   | 0.16644835 |
| REACTOME_PL_3K_CASCADE                                               | -1.4956654 | 0.16679163 |
| LEIN_MEDULLA_MARKERS                                                 | -1.4956117 | 0.16650835 |
| MULLIGHAN_MLL_SIGNATURE_1_DN                                         | -1.4953362 | 0.16656025 |
| SUZUKI_RESPONSE_TO_TSA_AND_DECITABINE_1B                             | -1.4950273 | 0.16666226 |
| SHEPARD_CRUSH_AND_BURN_MUTANT_UP                                     | -1.494802  | 0.16663626 |
| NAKAMURA_ADIPOGENESIS_LATE_DN                                        | -1.4943517 | 0.1669479  |
| REACTOME_PLATELET_AGGREGATION_PLUG_FORMATION                         | -1.4940503 | 0.16708691 |
| GUO_HEX_TARGETS_UP                                                   | -1.4938079 | 0.16707292 |
| REACTOME_REGULATION_OF_INSULIN_SECRETION_BY_GLUCAGON_LIKE_PEPTIDE1   | -1.4935818 | 0.16708039 |
| TONKS_TARGETS_OF_RUNX1_RUNX1T1_FUSION_ERYTHROCYTE_UP                 | -1.4935526 | 0.16678913 |
| MENSE_HYPOXIA_UP                                                     | -1.493323  | 0.16677924 |
| SABATES_COLORECTAL_ADENOMA_DN                                        | -1.4929856 | 0.1668987  |
| REACTOME_ACTIVATED_POINT_MUTANTS_OF_FGFR2                            | -1.4921104 | 0.16773304 |
| JIANG_HYPOXIA_NORMAL                                                 | -1.4920653 | 0.16744861 |
| FERRANDO_LYL1_NEIGHBORS                                              | -1.4920461 | 0.16713135 |
| KASLER_HDAC7_TARGETS_1_DN                                            | -1.4913753 | 0.16765558 |
| BIOCARTA_CCR5_PATHWAY                                                | -1.4912069 | 0.16753693 |
| KEGG_HISTIDINE_METABOLISM                                            | -1.4911919 | 0.16722342 |
| BONOME_OVARIAN_CANCER_POOR_SURVIVAL_UP                               | -1.4906105 | 0.16774844 |
| NABA_BASEMENT_MEMBRANES                                              | -1.4905102 | 0.16755414 |
| HUANG_DASATINIB_RESISTANCE_UP                                        | -1.4903963 | 0.16739719 |
| YAO_TEMPORAL_RESPONSE_TO_PROGESTERONE_CLUSTER_5                      | -1.4902729 | 0.16719179 |
| SCHAEFFER_PROSTATE_DEVELOPMENT_48HR_DN                               | -1.4893761 | 0.16808626 |
| KEGG_ABC_TRANSPORTERS                                                | -1.4893055 | 0.16783898 |
| VALK_AML_CLUSTER_10                                                  | -1.4892309 | 0.16761807 |
| KEGG_MTOR_SIGNALING_PATHWAY                                          | -1.4891069 | 0.16745445 |
| REACTOME_NUCLEAR_RECEPTOR_TRANSCRIPTION_PATHWAY                      | -1.4889338 | 0.16735944 |
| REACTOME_DIABETES_PATHWAYS                                           | -1.4886601 | 0.16738534 |
| COLIN_PILOCYTIC_ASTROCYTOMA_VS_GLIOMASTOMA_DN                        | -1.4881625 | 0.16788255 |
| BUKANOVICH_T_LYMPHOCYTE_HOMING_ON_TUMOR_DN                           | -1.4877201 | 0.16821465 |
| REACTOME_INHIBITION_OF_INSULIN_SECRETION_BY_ADRENALINE_NORADRENALINE | -1.48651   | 0.1694795  |
| PID_UPA_UPAR_PATHWAY                                                 | -1.4855082 | 0.1705304  |
| BIOCARTA_COMP_PATHWAY                                                | -1.4842293 | 0.17194894 |
| J1_CARCINOGENESIS_BY_KRAS_AND_STK11_DN                               | -1.4841739 | 0.17172007 |
| NAKAYAMA_FGF2_TARGETS                                                | -1.4837276 | 0.1720512  |
| SCHUETZ_BREAST_CANCER_DUCTAL_INVASIVE_UP                             | -1.4827515 | 0.17301506 |
| UZONYI_RESPONSE_TO_LEUKOTRIENE_AND_THROMBIN                          | -1.4826471 | 0.1727934  |
| WU_SILENCED_BY_METHYLATION_IN_BLADDER_CANCER                         | -1.4823973 | 0.17284031 |
| BIOCARTA_MYOSIN_PATHWAY                                              | -1.4817071 | 0.17346194 |
| AFFAR_YY1_TARGETS_UP                                                 | -1.4816759 | 0.1731894  |
| KEGG_ARGININE_AND_PROLINE_METABOLISM                                 | -1.479737  | 0.1757802  |
| REACTOME_OLFACTORY_SIGNALING_PATHWAY                                 | -1.4790385 | 0.17645274 |
| HERNANDEZ_ABERRANT_MITOSIS_BY_DOCETACEL_2NM_UP                       | -1.4782988 | 0.17722464 |
| LABBE_TARGETS_OF_TGFB1_AND_WNT3A_UP                                  | -1.4779372 | 0.17739527 |
| WU_ALZHEIMER_DISEASE_DN                                              | -1.4777204 | 0.17736034 |
| ONGUSAHA_TP53_TARGETS                                                | -1.476855  | 0.17820583 |
| SCHAEFFER_PROSTATE_DEVELOPMENT_12HR_UP                               | -1.4763404 | 0.1787283  |
| HOFMANN_MYELODYSPLASTIC_SYNDROM_LOW_RISK_UP                          | -1.4759581 | 0.17901164 |
| WANG_SMARCE1_TARGETS_UP                                              | -1.4758271 | 0.17894424 |
| COWLING_MYCN_TARGETS                                                 | -1.475197  | 0.17956255 |
| CHANG_CORE_SERUM_RESPONSE_DN                                         | -1.4750751 | 0.17943506 |
| KEGG_TGF_BETA_SIGNALING_PATHWAY                                      | -1.4750453 | 0.17914905 |
| THUM_MIR21_TARGETS_HEART_DISEASE_UP                                  | -1.4746376 | 0.17939462 |
| WANG_CLASSIC_ADIPOGENIC_TARGETS_OF_PPARG                             | -1.4742765 | 0.17963399 |
| LINDVALL_IMMORTALIZED_BY_TERT_UP                                     | -1.4733381 | 0.18065177 |
| REACTOME_GASTRIN_CREB_SIGNALING_PATHWAY_VIA_PKC_AND_MAPK             | -1.4732687 | 0.18041216 |

|                                                                   |            |            |
|-------------------------------------------------------------------|------------|------------|
| CHO_NR4A1_TARGETS                                                 | -1.4731236 | 0.18030262 |
| REACTOME_GPCR_LIGAND_BINDING                                      | -1.4722823 | 0.1810424  |
| KANG_AR_TARGETS_DN                                                | -1.4721868 | 0.1808399  |
| EBAUER_MYOGENIC_TARGETS_OF_PAX3_FOXO1_FUSION                      | -1.4720685 | 0.18065938 |
| REACTOME_GLYCEROPHOSPHOLIPID_BIOSYNTHESIS                         | -1.471972  | 0.18046133 |
| COULOUARN_TEMPORAL_TGFB1_SIGNATURE_DN                             | -1.4715925 | 0.18071203 |
| NABA_SECRETED_FACTORS                                             | -1.4714047 | 0.18062504 |
| NIKOLSKY_BREAST_CANCER_11Q12_Q14_AMPLICON                         | -1.4704419 | 0.18173909 |
| BEGUM_TARGETS_OF_PAX3_FOXO1_FUSION_DN                             | -1.4703492 | 0.1815718  |
| PLASARI_NFIC_TARGETS_BASAL_DN                                     | -1.4699014 | 0.18193014 |
| BIOCARTA_LAIR_PATHWAY                                             | -1.4696497 | 0.18200581 |
| PID_ENDOTHELIN_PATHWAY                                            | -1.4694722 | 0.18190923 |
| BONOME_OVARIAN_CANCER_SURVIVAL_OPTIMAL_DEBULKING                  | -1.4694005 | 0.18170226 |
| BIOCARTA_GSK3_PATHWAY                                             | -1.4690522 | 0.18185028 |
| VECCHI_GASTRIC_CANCER_ADVANCED_VS_EARLY_UP                        | -1.4689924 | 0.18160643 |
| GROSS_HYPOXIA_VIA_HIF1A_DN                                        | -1.4687873 | 0.18159673 |
| LENAOUR_DENDRITIC_CELL_MATURATION_UP                              | -1.4686137 | 0.1815102  |
| TAKAO_RESPONSE_TO_UVB_RADIATION_DN                                | -1.4682856 | 0.18174326 |
| AMIT_EGF_RESPONSE_60_MCF10A                                       | -1.46824   | 0.18147336 |
| HILLION_HMG1A1_TARGETS                                            | -1.4680673 | 0.18141012 |
| TSAI_RESPONSE_TO_RADIATION_THERAPY                                | -1.4675533 | 0.18185073 |
| SHEDDEN_LUNG_CANCER_GOOD_SURVIVAL_A4                              | -1.4674242 | 0.18171561 |
| IWANAGA_CARCINOGENESIS_BY_KRAS_DN                                 | -1.4672256 | 0.18170317 |
| VANHARANTA_UTERINE_FIBROID_DN                                     | -1.4670628 | 0.18156467 |
| PEPPER_CHRONIC_LYMPHOCTIC_LEUKEMIA_DN                             | -1.4666862 | 0.18176046 |
| CLASPER_LYMPHATIC_VESSELS_DURING_METASTASIS_DN                    | -1.4664646 | 0.18175381 |
| JAZAERI_BREAST_CANCER_BRCA1_VS_BRCA2_DN                           | -1.4663318 | 0.18166281 |
| PID_HDAC_CLASSIII_PATHWAY                                         | -1.4658905 | 0.18200712 |
| PEPPER_CHRONIC_LYMPHOCTIC_LEUKEMIA_UP                             | -1.4658653 | 0.18172027 |
| GAUSSMANN_MLL_AF4_FUSION_TARGETS_F_UP                             | -1.4652818 | 0.18219493 |
| KEGG_VALINE_LEUCINE_AND_Isoleucine_DEGRADATION                    | -1.4651812 | 0.18200976 |
| REACTOME_BILE_ACID_AND_BILE_SALT_METABOLISM                       | -1.4651446 | 0.18173955 |
| ZHOU_INFLAMMATORY_RESPONSE_FIMA_UP                                | -1.4649801 | 0.18166047 |
| CHIBA_RESPONSE_TO_TSA                                             | -1.4647642 | 0.1816353  |
| THUM_SYSTOLIC_HEART_FAILURE_UP                                    | -1.464485  | 0.18175955 |
| DEMAGALHAES_AGING_UP                                              | -1.463801  | 0.1824699  |
| RUAN_RESPONSE_TO_TROGLITAZONE_DN                                  | -1.4636666 | 0.18236427 |
| PARENT_MTOR_SIGNALING_UP                                          | -1.4635808 | 0.18215755 |
| BEGUM_TARGETS_OF_PAX3_FOXO1_FUSION_UP                             | -1.463494  | 0.18194743 |
| BIOCARTA_NOS1_PATHWAY                                             | -1.4629128 | 0.1824575  |
| KEGG_CARDIAC_MUSCLE_CONTRACTION                                   | -1.4623442 | 0.1829893  |
| PID_LYMPH_ANGIOGENESIS_PATHWAY                                    | -1.4620036 | 0.1831212  |
| KONDO_PROSTATE_CANCER_WITH_H3K27ME3                               | -1.4614294 | 0.18359095 |
| WANG_PROSTATE_CANCER_ANDROGEN_INDEPENDENT                         | -1.4614211 | 0.18328981 |
| QI_HYPOXIA                                                        | -1.4612684 | 0.18321177 |
| TERAO_AOX4_TARGETS_HG_UP                                          | -1.4603301 | 0.18413508 |
| PID_TOLL_ENDOGENOUS_PATHWAY                                       | -1.4600395 | 0.18419692 |
| TONKS_TARGETS_OF_RUNX1_RUNX1T1_FUSION_SUSTAINED_IN_ERYTHROCYTE_UP | -1.45935   | 0.18484227 |
| JIANG_AGING_HYPOTHALAMUS_DN                                       | -1.4584585 | 0.18581298 |
| GROSS_ELK3_TARGETS_UP                                             | -1.4583074 | 0.18569659 |
| ZIRN_TRETINOIN_RESPONSE_UP                                        | -1.4578174 | 0.18617015 |
| PID_ARF6_TRAFFICKING_PATHWAY                                      | -1.4573916 | 0.18647541 |
| REACTOME_ACTIVATED_AMPK_STIMULATES_FATTY_ACID_OXIDATION_IN_MUSCLE | -1.4573753 | 0.18618488 |
| VALK_AML_WITH_EV1                                                 | -1.4570777 | 0.18625107 |
| CHIARADONNA_NEOPLASTIC_TRANSFORMATION_CDC25_UP                    | -1.4569801 | 0.18607935 |
| HUMMERICH_MALIGNANT_SKIN_TUMOR_DN                                 | -1.4569337 | 0.18582521 |
| KEGG_ECM_RECEPTOR_INTERACTION                                     | -1.4563253 | 0.18634161 |
| AMIT_EGF_RESPONSE_40_MCF10A                                       | -1.4558122 | 0.18667369 |
| REACTOME_SIGNALING_BY_PDGF                                        | -1.4549185 | 0.18768422 |
| COLIN_PILOCYTIC_ASTROCYTOMA_VS_GLIOMASTOMA_UP                     | -1.454317  | 0.1882245  |
| BERENJENO_ROCK_SIGNALING_NOT_VIA_RHOA_DN                          | -1.4539458 | 0.18849486 |
| KEGG_STEROID_HORMONE_BIOSYNTHESIS                                 | -1.4538527 | 0.18832639 |
| IIZUKA_LIVER_CANCER_PROGRESSION_LO_L1_DN                          | -1.4538037 | 0.18807617 |
| GAUSSMANN_MLL_AF4_FUSION_TARGETS_E_DN                             | -1.4537699 | 0.18780951 |
| MILI_PSEUDOPODIA                                                  | -1.4534899 | 0.18790062 |
| SUZUKI_RESPONSE_TO_TSA_AND_DECITABINE_1A                          | -1.4529196 | 0.18841521 |
| SCHRAETS_MLL_TARGETS_UP                                           | -1.4527229 | 0.18840176 |
| TERAO_AOX4_TARGETS_SKIN_DN                                        | -1.4526981 | 0.18814853 |
| NIELSEN_LEIOMYOSARCOMA_CNN1_UP                                    | -1.4526073 | 0.18798223 |
| DACOSTA_ERCC3_ALLELE_XPCS_VS_TTD_DN                               | -1.4522299 | 0.18826231 |
| CROONQUIST_IL6_DEPRIVATION_UP                                     | -1.450486  | 0.19042787 |
| CHEN_ETV5_TARGETS_SERTOLI                                         | -1.4504126 | 0.1902086  |
| CHUANG_OXIDATIVE_STRESS_RESPONSE_UP                               | -1.4502896 | 0.19010955 |
| UDAYAKUMAR_MED1_TARGETS_DN                                        | -1.4499114 | 0.19034871 |
| YANG_MUC2_TARGETS_DUODENUM_6MO_DN                                 | -1.4498632 | 0.1901     |
| KEGG_VASCULAR_SMOOTH_MUSCLE_CONTRACTION                           | -1.4496586 | 0.19010183 |
| KEGG_CALCIIUM_SIGNALING_PATHWAY                                   | -1.4492781 | 0.19031477 |

|                                                                |            |            |
|----------------------------------------------------------------|------------|------------|
| BAELDE_DIABETIC_NEPHROPATHY_DN                                 | -1.4490701 | 0.19033417 |
| SHEN_SMARCA2_TARGETS_DN                                        | -1.4487497 | 0.19050714 |
| PURBEY_TARGETS_OF_CTBP1_NOT_SATB1_UP                           | -1.4481177 | 0.19114506 |
| NIELSEN_GIST_AND_SYNOVIAL_SARCOMA_DN                           | -1.4480429 | 0.19094706 |
| CHEBOTAEV_GR_TARGETS_UP                                        | -1.4480329 | 0.19065237 |
| LEE_CALORIE_RESTRICTION_NEOCORTEX_DN                           | -1.4475913 | 0.1910021  |
| BIOCARTA_IL10_PATHWAY                                          | -1.4474539 | 0.19089133 |
| REACTOME_PROSTACYCLIN_SIGNALLING_THROUGH_PROSTACYCLIN_RECEPTOR | -1.447433  | 0.19059789 |
| TANG_SENESCENCE_TP53_TARGETS_UP                                | -1.4463217 | 0.19185437 |
| NAKAYAMA_SOFT_TISSUE_TUMORS_PCA2_DN                            | -1.4459875 | 0.19203837 |
| CHANDRAN_METASTASIS_DN                                         | -1.4458776 | 0.19189936 |
| ABE_VEGFA_TARGETS                                              | -1.4456531 | 0.19190331 |
| SCHWAB_TARGETS_OF_BMYB_POLYMORPHIC_VARIANTS_DN                 | -1.4450623 | 0.19247745 |
| SCHRAMM_INHBA_TARGETS_DN                                       | -1.4449036 | 0.19237712 |
| ROSS_AML_OF_FAB_M7_TYPE                                        | -1.4447751 | 0.1922359  |
| PETRETTO_HEART_MASS_QTL_CIS_UP                                 | -1.4447626 | 0.19196537 |
| DELACROIX_RAR_TARGETS_DN                                       | -1.4443446 | 0.19229639 |
| LINDGREN_BLADDER_CANCER_CLUSTER_2A_DN                          | -1.4443316 | 0.19201311 |
| KEGG_ETHER_LIPID_METABOLISM                                    | -1.4438932 | 0.1923342  |
| SCHOEN_NFKB_SIGNALING                                          | -1.4438889 | 0.19203618 |
| ROSS_AML_WITH_MLL_FUSIONS                                      | -1.4438174 | 0.19185738 |
| BOCHKIS_FOXA2_TARGETS                                          | -1.4436356 | 0.19187933 |
| KANG_GIST_WITH_PDGFR_A_UP                                      | -1.4433966 | 0.19190507 |
| HAMAI_APOPTOSIS_VIA_TRAIL_DN                                   | -1.4431832 | 0.1919089  |
| LI_WILMS_TUMOR_VS_FETAL_KIDNEY_1_UP                            | -1.4431697 | 0.19162199 |
| MISHRA_CARCINOMA_ASSOCIATED_FIBROBLAST_UP                      | -1.4413211 | 0.19403006 |
| WATTEL_AUTONOMOUS_THYROID_ADENOMA_DN                           | -1.4409511 | 0.19422115 |
| KASLER_HDAC7_TARGETS_2_DN                                      | -1.4403763 | 0.19477569 |
| LI_WILMS_TUMOR                                                 | -1.4397776 | 0.19527625 |
| MEISSNER_NPC_HCP_WITH_H3K4ME2                                  | -1.4397695 | 0.1949788  |
| IVANOVA_HEMATOPOIESIS_STEM_CELL_LONG_TERM                      | -1.4396633 | 0.19481592 |
| KEGG_GLYCOSAMINOGLYCAN_DEGRADATION                             | -1.4395795 | 0.1946574  |
| FLOTHO_PEDIATRIC_ALL_THERAPY_RESPONSE_UP                       | -1.4395465 | 0.19439496 |
| HUI_MAPK14_TARGETS_UP                                          | -1.4395323 | 0.19412392 |
| SIMBULAN_UV_RESPONSE_NORMAL_DN                                 | -1.438877  | 0.19481227 |
| KEGG_GLYCINE_SERINE_AND_THREONINE_METABOLISM                   | -1.4388386 | 0.19456884 |
| KAAB_FAILED_HEART_ATRIUM_DN                                    | -1.4387895 | 0.19435954 |
| PLASARI_TGFB1_TARGETS_10HR_UP                                  | -1.4378705 | 0.19544591 |
| WILCOX_RESPONSE_TO_PROGESTERONE_DN                             | -1.4377643 | 0.1952805  |
| PID_RET_PATHWAY                                                | -1.4377111 | 0.19506025 |
| SUNG_METASTASIS_STROMA_UP                                      | -1.4369406 | 0.19587684 |
| BIOCARTA_EPO_PATHWAY                                           | -1.4361088 | 0.19679064 |
| PLASARI_TGFB1_SIGNALING_VIA_NFIC_1HR_UP                        | -1.4354584 | 0.1974337  |
| VANDESLUIS_COMMD1_TARGETS_GROUP_3_DN                           | -1.435413  | 0.19720943 |
| SARTIPY_NORMAL_AT_INSULIN_RESISTANCE_UP                        | -1.4353822 | 0.19695944 |
| KEGG_LINOLEIC_ACID_METABOLISM                                  | -1.4350624 | 0.19713604 |
| BORCZUK_MALIGNANT_MESOTHELIOMA_DN                              | -1.434911  | 0.19706102 |
| PODAR_RESPONSE_TO_ADAPHOSTIN_UP                                | -1.4347472 | 0.19699238 |
| WELCH_GATA1_TARGETS                                            | -1.4346507 | 0.19680934 |
| SMID_BREAST_CANCER_LUMINAL_A_UP                                | -1.4344913 | 0.196713   |
| ROY_WOUND_BLOOD_VESSEL_UP                                      | -1.434485  | 0.19642517 |
| PID_INTEGRIN3_PATHWAY                                          | -1.434353  | 0.19630644 |
| LI_ADIPOGENESIS_BY_ACTIVATED_PPARG                             | -1.4342364 | 0.19617496 |
| ZIRN_TRETINOIN_RESPONSE_WT1_UP                                 | -1.4337585 | 0.19659287 |
| CHICAS_RB1_TARGETS_CONFLUENT                                   | -1.4331663 | 0.19715713 |
| SASSON_RESPONSE_TO_GONADOTROPHINS_UP                           | -1.4331446 | 0.19690363 |
| VERHAAK_AML_WITH_NPM1_MUTATED_UP                               | -1.4330997 | 0.19666947 |
| GARGALOVIC_RESPONSE_TO_OXIDIZED_PHOSPHOLIPIDS_TURQUOISE_UP     | -1.4330946 | 0.19638716 |
| JOHNSTONE_PARVB_TARGETS_1_DN                                   | -1.4325387 | 0.19694954 |
| SIMBULAN_PARP1_TARGETS_UP                                      | -1.4323831 | 0.19686107 |
| REACTOME_EICOSANOID_LIGAND_BINDING_RECEPTORS                   | -1.4318652 | 0.19723104 |
| REACTOME_METABOLISM_OF_VITAMINS_AND_COFACTORS                  | -1.4318033 | 0.19702554 |
| VALK_AML_CLUSTER_9                                             | -1.43163   | 0.19699477 |
| MIDORIKAWA_AMPLIFIED_IN_LIVER_CANCER                           | -1.4314469 | 0.19695637 |
| KAN_RESPONSE_TO_ARSENIC_TRIOXIDE                               | -1.430702  | 0.1978332  |
| SENESE_HDAC1_AND_HDAC2_TARGETS_DN                              | -1.4303364 | 0.19805747 |
| KEGG_PEROXISOME                                                | -1.4300123 | 0.19823647 |
| EBAUER_TARGETS_OF_PAX3_FOXO1_FUSION_UP                         | -1.4298548 | 0.19814937 |
| PID_TCPTP_PATHWAY                                              | -1.42965   | 0.19815741 |
| REACTOME_INTEGRIN_CELL_SURFACE_INTERACTIONS                    | -1.4295766 | 0.19798258 |
| MILI_PSEUDOPODIA_CHEMOTAXIS_UP                                 | -1.4292731 | 0.19807227 |
| MORI_SMALL_PRE_BII_LYMPHOCYTE_UP                               | -1.4285789 | 0.19880356 |
| REACTOME_ADP_SIGNALLING_THROUGH_P2RY1                          | -1.42848   | 0.19864954 |
| REACTOME_PHOSPHOLIPASE_C_MEDIATED_CASCADE                      | -1.4274144 | 0.19986384 |
| ZHAN_MULTIPLE_MYELOMA_MS_UP                                    | -1.4274054 | 0.1995904  |
| STEGER_ADIPOGENESIS_UP                                         | -1.4271488 | 0.19967914 |
| MIKKELSEN_IPS_LCP_WITH_H3K4ME3                                 | -1.4271162 | 0.19943358 |

|                                                    |            |            |
|----------------------------------------------------|------------|------------|
| BIOCARTA_PDGF_PATHWAY                              | -1.426232  | 0.20040438 |
| YAO_TEMPORAL_RESPONSE_TO_PROGESTERONE_CLUSTER_8    | -1.4255567 | 0.20105661 |
| KEGG_CITRATE_CYCLE_TCA_CYCLE                       | -1.4251095 | 0.20143615 |
| PETROVA_ENDOTHELIUM_LYMPHATIC_VS_BLOOD_DN          | -1.4249998 | 0.20131917 |
| NADLER_OBESITY_UP                                  | -1.4245999 | 0.20156088 |
| LINDSTEDT_DENDRITIC_CELL_MATURATION_D              | -1.4241593 | 0.20190383 |
| VALK_AML_CLUSTER_4                                 | -1.423938  | 0.2019141  |
| YOSHIMURA_MAPK8_TARGETS_DN                         | -1.423804  | 0.20183639 |
| DELACROIX_RAR_TARGETS_UP                           | -1.4235138 | 0.20195597 |
| IVANOVA_HEMATOPOIESIS_STEM_CELL                    | -1.4234648 | 0.20174049 |
| DELASERNA_MYOD_TARGETS_DN                          | -1.4219904 | 0.20358597 |
| WANG_METHYLATED_IN_BREAST_CANCER                   | -1.4219207 | 0.20339635 |
| BRUINS_UVC_RESPONSE_VIA_TP53_GROUP_B               | -1.4218388 | 0.20322289 |
| NAGASHIMA_NRG1_SIGNALING_UP                        | -1.4215868 | 0.20333007 |
| HARRIS_BRAIN_CANCER_PROGENITORS                    | -1.4215561 | 0.20307614 |
| RAGHAVACHARI_PLATELET_SPECIFIC_GENES               | -1.4214307 | 0.20299302 |
| REACTOME_G_ALPHA_Z_SIGNALING_EVENTS                | -1.4212862 | 0.2029024  |
| KEGG_PROPANOATE_METABOLISM                         | -1.4210626 | 0.20287788 |
| WEINMANN_ADAPTATION_TO_HYPOXIA_DN                  | -1.4204874 | 0.20345117 |
| HANN_RESISTANCE_TO_BCL2_INHIBITOR_UP               | -1.4200547 | 0.20376436 |
| KEGG_TYPE_II_DIABETES_MELLITUS                     | -1.4198513 | 0.20374309 |
| PID_VEGFR1_2_PATHWAY                               | -1.4196421 | 0.20380087 |
| KIM_GLI52_TARGETS_UP                               | -1.419547  | 0.20365906 |
| HU_GENOTOXIN_ACTION_DIRECT_VS_INDIRECT_4HR         | -1.4191856 | 0.20394225 |
| MOTHA_GLUCONEOGENESIS                              | -1.4189646 | 0.20397648 |
| RIGGI_EWING_SARCOMA_PROGENITOR_UP                  | -1.4184613 | 0.204396   |
| NABA_PROTEOGLYCANS                                 | -1.4184068 | 0.20417531 |
| DAIRKEE_TERT_TARGETS_DN                            | -1.4179101 | 0.2046058  |
| PID_INTEGRIN1_PATHWAY                              | -1.4179065 | 0.20433667 |
| LEE_LIVER_CANCER_CIPROFIBRATE_DN                   | -1.4177885 | 0.20418514 |
| HOWLIN_PUBERTAL_MAMMARY_GLAND                      | -1.4174865 | 0.20436752 |
| ZHAN_LATE_DIFFERENTIATION_GENES_UP                 | -1.4161109 | 0.20603096 |
| JIANG_AGING_HYPOTHALAMUS_UP                        | -1.4160318 | 0.20585708 |
| JECHLINGER_EPITHELIAL_TO_MESENCHYMAL_TRANSITION_UP | -1.4156909 | 0.20610614 |
| BONCI_TARGETS_OF_MIR15A_AND_MIR16_1                | -1.4150935 | 0.20667684 |
| HOOI_ST7_TARGETS_UP                                | -1.4149348 | 0.20661724 |
| YAO_HOXA10_TARGETS_VIA_PROGESTERONE_DN             | -1.4146905 | 0.20668477 |
| KYNG_DNA_DAMAGE_DN                                 | -1.4146607 | 0.20646228 |
| GAJATE_RESPONSE_TO_TRABECTEDIN_UP                  | -1.414505  | 0.20638911 |
| JUBAN_TARGETS_OF_SPI1_AND_FLI1_UP                  | -1.4142932 | 0.20645775 |
| GOLDRATH_IMMUNE_MEMORY                             | -1.4139351 | 0.20671189 |
| MARIADASON_REGULATED_BY_HISTONE_ACETYLATION_UP     | -1.4136553 | 0.20682485 |
| SCHLINGEMANN_SKIN_CARCINOGENESIS_TPA_UP            | -1.4131478 | 0.20729038 |
| DAVIES_MULTIPLE_MYELOMA_VS_MGUS_DN                 | -1.4131358 | 0.20702392 |
| PETROVA_PROX1_TARGETS_DN                           | -1.4124811 | 0.20770632 |
| BALDWIN_PRKCI_TARGETS_UP                           | -1.411583  | 0.20869943 |
| WIERENGA_STATS5A_TARGETS_DN                        | -1.4111174 | 0.20910434 |
| KEGG_DILATED_CARDIOMYOPATHY                        | -1.4105995 | 0.20959678 |
| GERHOLD_ADIPOGENESIS_DN                            | -1.4102563 | 0.2097887  |
| YAO_TEMPORAL_RESPONSE_TO_PROGESTERONE_CLUSTER_2    | -1.4099501 | 0.2099488  |
| SCHAEFFER_PROSTATE_DEVELOPMENT_12HR_DN             | -1.4092064 | 0.21069671 |
| BRUECKNER_TARGETS_OF_MIRLET7A3_DN                  | -1.4087957 | 0.21102314 |
| ZHAN_MULTIPLE_MYELOMA_DN                           | -1.4083813 | 0.21134113 |
| YAO_TEMPORAL_RESPONSE_TO_PROGESTERONE_CLUSTER_16   | -1.4083374 | 0.21112557 |
| STARK_HYPPOCAMPUS_22Q11_DELETION_DN                | -1.4079471 | 0.21136889 |
| SMID_BREAST_CANCER_RELAPSE_IN_LUNG_DN              | -1.4076096 | 0.2115597  |
| HOELZEL_NF1_TARGETS_DN                             | -1.4075804 | 0.21131316 |
| BOQUEST_STEM_CELL_CULTURED_VS_FRESH_DN             | -1.4074341 | 0.2112449  |
| DARWICHE_PAPILLOMA_RISK_LOW_DN                     | -1.4070747 | 0.2115162  |
| TAVOR_CEBPA_TARGETS_DN                             | -1.4066244 | 0.2119045  |
| REACTOME_SIGNALING_BY_FGFR                         | -1.4063133 | 0.21209212 |
| CHEMELLO_SOLEUS_VS_EDL_MYOFIBERS_DN                | -1.4061726 | 0.21203816 |
| CORRE_MULTIPLE_MYELOMA_DN                          | -1.4060603 | 0.21193483 |
| VERHAAK_GLIOMASTOMA_MESENCHYMAL                    | -1.4054903 | 0.2124665  |
| GRADE_COLON_AND_RECTAL_CANCER_DN                   | -1.404603  | 0.21348614 |
| EPPERT_CE_HSC_LSC                                  | -1.4044944 | 0.21337251 |
| REACTOME_PEROXISOMAL_LIPID_METABOLISM              | -1.4041605 | 0.21358107 |
| MODY_HIPPOCAMPUS_POSTNATAL                         | -1.4039855 | 0.21356817 |
| KYNG_DNA_DAMAGE_BY_GAMMA_RADIATION                 | -1.4039733 | 0.21329564 |
| VILIMAS_NOTCH1_TARGETS_DN                          | -1.403409  | 0.2138728  |
| RUTELLA_RESPONSE_TO_CSF2RB_AND_IL4_DN              | -1.4034039 | 0.21360528 |
| MACLACHLAN_BRCA1_TARGETS_UP                        | -1.4033408 | 0.21342316 |
| BIOCARTA_ALK_PATHWAY                               | -1.4030517 | 0.21355908 |
| REACTOME_DOWNSTREAM_SIGNAL_TRANSDUCTION            | -1.4026622 | 0.21381949 |
| NABA_ECM_AFFILIATED                                | -1.4024167 | 0.21391796 |
| HERNANDEZ_ABERRANT_MITOSIS_BY_DOCETACEL_4NM_UP     | -1.4023681 | 0.21369044 |
| SMID_BREAST_CANCER_NORMAL_LIKE_UP                  | -1.4023496 | 0.21344072 |

|                                                                                  |            |            |
|----------------------------------------------------------------------------------|------------|------------|
| BROWNE_HCMV_INFECTION_12HR_DN                                                    | -1.4021366 | 0.21346025 |
| COATES_MACROPHAGE_M1_VS_M2_UP                                                    | -1.4020408 | 0.21333703 |
| SASSON_RESPONSE_TO_GONADOTROPHINS_DN                                             | -1.4016436 | 0.21361953 |
| TARTE_PLASMA_CELL_VS_PLASMABLAST_UP                                              | -1.4013101 | 0.21381359 |
| WENG_POR_TARGETS_LIVER_DN                                                        | -1.4012331 | 0.21364962 |
| PAPASPYRIDONOS_UNSTABLE_ATEROSCLEROTIC_PLAQUE_UP                                 | -1.4012066 | 0.21340883 |
| REACTOME_PHOSPHOLIPID_METABOLISM                                                 | -1.4007914 | 0.21375065 |
| POS_HISTAMINE_RESPONSE_NETWORK                                                   | -1.4005312 | 0.21385957 |
| PASINI_SUZ12_TARGETS_DN                                                          | -1.4003923 | 0.21379577 |
| REACTOME_CLASS_A1_RHODOPSIN_LIKE_RECEPTORS                                       | -1.4000275 | 0.21402855 |
| ROZANOV_MMP14_TARGETS_UP                                                         | -1.3996351 | 0.21433643 |
| REACTOME_FATTY_ACYL_COA_BIOSYNTHESIS                                             | -1.3993126 | 0.21451838 |
| PID_SHP2_PATHWAY                                                                 | -1.3975267 | 0.2168342  |
| KEGG_RENIN_ANGIOTENSIN_SYSTEM                                                    | -1.397123  | 0.21716973 |
| OLSSON_E2F3_TARGETS_UP                                                           | -1.3970997 | 0.21693671 |
| LU_AGING_BRAIN_DN                                                                | -1.3969226 | 0.21689333 |
| HENDRICKS_SMARCA4_TARGETS_UP                                                     | -1.3962094 | 0.21776329 |
| MOOTHA_PGC                                                                       | -1.3959209 | 0.21785752 |
| RIGGI_EWING_SARCOMA_PROGENITOR_DN                                                | -1.3958066 | 0.21776178 |
| AMIT_EGF_RESPONSE_120_HELA                                                       | -1.3955127 | 0.21788555 |
| REACTOME_INNATE_IMMUNE_SYSTEM                                                    | -1.3949338 | 0.21853393 |
| BIOCARTA_ACTINY_PATHWAY                                                          | -1.394885  | 0.21834892 |
| BIOCARTA_AGR_PATHWAY                                                             | -1.394773  | 0.2182559  |
| TONKS_TARGETS_OF_RUNX1_RUNX1T1_FUSION GRANULOCYTE_UP                             | -1.3942112 | 0.2188285  |
| HELLER_HDAC_TARGETS_SILENCED_BY_METHYLATION_UP                                   | -1.393719  | 0.21928258 |
| LIN_NP4S4_TARGETS_DN                                                             | -1.3936143 | 0.21915773 |
| AMIT_EGF_RESPONSE_240_HELA                                                       | -1.3935688 | 0.21894585 |
| REACTOME_CHYLOMICRON_MEDIATED_LIPID_TRANSPORT                                    | -1.3933803 | 0.21895602 |
| ODONNELL_TFRC_TARGETS_UP                                                         | -1.3927214 | 0.21965048 |
| TORCHIA_TARGETS_OF_EWSR1_FL1_FUSION_TOP20_DN                                     | -1.3926492 | 0.21947333 |
| REACTOME_G_BETA_GAMMA_SIGNALING_THROUGH_PLG_BETA                                 | -1.392538  | 0.21935141 |
| SASSON_RESPONSE_TO_FORSKOLIN_DN                                                  | -1.3921262 | 0.21967334 |
| RUTELLA_RESPONSE_TO_HGF_VS_CSF2RB_AND_IL4_UP                                     | -1.3919173 | 0.21970487 |
| DURAND_STROMA_NS_UP                                                              | -1.3917471 | 0.21965747 |
| LAIHO_COLORECTAL_CANCER_SERRATED_UP                                              | -1.3917464 | 0.21938595 |
| REACTOME_Glutamate_NEUROTRANSMITTER_RELEASE_CYCLE                                | -1.3911337 | 0.22003151 |
| REACTOME_FGFR_LIGAND_BINDING_AND_ACTIVATION                                      | -1.3909024 | 0.2201041  |
| MIKKELSEN_NPC_ICP_WITH_H3K4ME3                                                   | -1.390845  | 0.21990994 |
| REACTOME_SEMAPHORIN_INTERACTIONS                                                 | -1.3900051 | 0.2208649  |
| REACTOME_DOWNSTREAM_SIGNALING_OF_ACTIVATED_FGFR                                  | -1.3899926 | 0.22061576 |
| BIOCARTA_HDAC_PATHWAY                                                            | -1.3896849 | 0.22079267 |
| DELACROIX_RAR_BOUND_ES                                                           | -1.3889672 | 0.22162656 |
| BIOCARTA_MCALPAIN_PATHWAY                                                        | -1.3885266 | 0.22202106 |
| DELASERNA_MYOD_TARGETS_UP                                                        | -1.3879005 | 0.22264072 |
| REACTOME_PTM_GAMMA_CARBOXYLATION_HYPUSINE_FORMATION_AND_ARYLSULFATASE_ACTIVATION | -1.3877956 | 0.22254308 |
| POMEROY_MEDULLOBLASTOMA_PROGNOSIS_UP                                             | -1.3874397 | 0.2228268  |
| PID_S1P_META_PATHWAY                                                             | -1.3872745 | 0.2228169  |
| BIOCARTA_EGF_PATHWAY                                                             | -1.386783  | 0.22331345 |
| JOHNSTONE_PARVB_TARGETS_3_UP                                                     | -1.3864111 | 0.22357991 |
| BYSTRYKH_HEMATOPOIESIS_STEM_CELL_QTL_CIS                                         | -1.3863038 | 0.2234492  |
| BIOCARTA_INTEGRIN_PATHWAY                                                        | -1.3861333 | 0.22343616 |
| SERVITJA_LIVER_HNF1A_TARGETS_DN                                                  | -1.3861244 | 0.22317548 |
| LOPEZ_TRANSLATION_VIA_FN1_SIGNALING                                              | -1.385807  | 0.22338285 |
| HELLEBREKERS_SILENCED_DURING_TUMOR_ANGIOGENESIS                                  | -1.3857749 | 0.22315252 |
| GROSS_HYPOXIA_VIA_ELK3_DN                                                        | -1.3852235 | 0.2237143  |
| RODWELL_AGING_KIDNEY_NO_BLOOD_UP                                                 | -1.3850284 | 0.22371934 |
| JAZAG_TGFB1_SIGNALING_VIA_SMAD4_DN                                               | -1.3846086 | 0.22404376 |
| PEDERSEN_TARGETS_OF_611CTF_ISOFORM_OF_ERBB2                                      | -1.3843702 | 0.22409527 |
| BIOCARTA_GPCR_PATHWAY                                                            | -1.3843124 | 0.22390786 |
| MEISSNER_NPC_ICP_WITH_H3_UNMETHYLATED                                            | -1.3843056 | 0.22365361 |
| SARTIPY_NORMAL_AT_INSULIN_RESISTANCE_DN                                          | -1.3842294 | 0.22350095 |
| SMIRNOV_CIRCULATING_ENDOTHELIOCYTES_IN_CANCER_UP                                 | -1.3841357 | 0.22337657 |
| KAYO_CALORIE_RESTRICTION_MUSCLE_DN                                               | -1.3841233 | 0.22311975 |
| KEGG_GAP_JUNCTION                                                                | -1.3838047 | 0.22330366 |
| MULLIGHAN_NPM1_SIGNATURE_3_DN                                                    | -1.3836609 | 0.22327302 |
| REACTOME_SULFUR_AMINO_ACID_METABOLISM                                            | -1.3828962 | 0.22413547 |
| RASHI_RESPONSE_TO_IONIZING_RADIATION_5                                           | -1.3826021 | 0.2243189  |
| LEE_LIVER_CANCER_ACOX1_UP                                                        | -1.3821148 | 0.2247731  |
| MA_MYELOID_DIFFERENTIATION_UP                                                    | -1.3819329 | 0.22476776 |
| PROVENZANI_METASTASIS_UP                                                         | -1.3812095 | 0.22551468 |
| DAVICIONI_RHABDOMYOSARCOMA_PAX_FOXO1_FUSION_UP                                   | -1.3806701 | 0.22609447 |
| ONDER_CDH1_TARGETS_3_UP                                                          | -1.3802291 | 0.22647305 |
| VANLOO_SP3_TARGETS_DN                                                            | -1.3797815 | 0.22686961 |
| NUTT_GBM_VS_AO_GLIOMA_UP                                                         | -1.3797156 | 0.2266628  |
| NATSUME_RESPONSE_TO_INTERFERON_BETA_DN                                           | -1.3796664 | 0.22646528 |
| KEGG_AXON_GUIDANCE                                                               | -1.3794754 | 0.22649069 |
| MEISSNER_BRAIN_HCP_WITH_H3_UNMETHYLATED                                          | -1.3791714 | 0.22671045 |

|                                                                |            |            |
|----------------------------------------------------------------|------------|------------|
| NEWMAN_ERCC6_TARGETS_DN                                        | -1.3786287 | 0.22724113 |
| PID_AMB2_NEUTROPHILS_PATHWAY                                   | -1.3772153 | 0.22902118 |
| SAGIV_CD24_TARGETS_DN                                          | -1.3771974 | 0.22879113 |
| KEGG_MAPK_SIGNALING_PATHWAY                                    | -1.3770708 | 0.22874165 |
| REACTOME_SIGNALING_BY_BMP                                      | -1.3770298 | 0.22855994 |
| CERVERA_SDHB_TARGETS_1_UP                                      | -1.3762788 | 0.22941068 |
| FLECHNER_BIOPSY_KIDNEY_TRANSPLANT_OK_VS_DONOR_UP               | -1.3758761 | 0.22970888 |
| KEGG_PROXIMAL_TUBULE_BICARBONATE_RECLAMATION                   | -1.3755305 | 0.2299092  |
| VALK_AML_WITH_CEBPA                                            | -1.3752257 | 0.23012285 |
| LIAN_LIPA_TARGETS_6M                                           | -1.3744837 | 0.23090248 |
| BOUDOUKHA_BOUND_BY_IGF2BP2                                     | -1.3740854 | 0.23119932 |
| HALMOS_CEBPA_TARGETS_UP                                        | -1.3740109 | 0.23103021 |
| SENESE_HDAC2_TARGETS_DN                                        | -1.3737928 | 0.23106441 |
| LE_SKI_TARGETS_UP                                              | -1.3736427 | 0.23097906 |
| ALONSO_METASTASIS_NEURAL_UP                                    | -1.3734728 | 0.23096825 |
| GNATENKO_PLATELET_SIGNATURE                                    | -1.3732688 | 0.2310275  |
| SHI_SPARC_TARGETS_UP                                           | -1.3732291 | 0.2308163  |
| LEE_AGING_MUSCLE_DN                                            | -1.3730612 | 0.23080473 |
| WOOD_EBV_EBNA1_TARGETS_UP                                      | -1.3728321 | 0.2308652  |
| FERREIRA_EWINGS_SARCOMA_UNSTABLE_VS_STABLE_DN                  | -1.3726386 | 0.23088089 |
| LIAN_LIPA_TARGETS_3M                                           | -1.3722371 | 0.23121221 |
| YANG_MUC2_TARGETS_DUODENUM_3MO_DN                              | -1.372187  | 0.2310041  |
| SHIN_B_CELL_LYMPHOMA_CLUSTER_7                                 | -1.3718145 | 0.2312225  |
| TAKEDA_TARGETS_OF_NUP98_HOXA9_FUSION_6HR_UP                    | -1.3710185 | 0.23210081 |
| TONKS_TARGETS_OF_RUNX1_RUNX1T1_FUSION_SUSTAINED_IN_MONOCYTE_UP | -1.3704368 | 0.23268996 |
| TAKEDA_TARGETS_OF_NUP98_HOXA9_FUSION_10D_DN                    | -1.3703268 | 0.23261113 |
| BURTON_ADIPOGENESIS_8                                          | -1.3703086 | 0.23237728 |
| TAKEDA_TARGETS_OF_NUP98_HOXA9_FUSION_6HR_DN                    | -1.3698506 | 0.23280513 |
| ZHAN_MULTIPLE_MYELOMA_MF_UP                                    | -1.3694143 | 0.23311338 |
| UEDA_CENTRAL_CLOCK                                             | -1.3693619 | 0.23290761 |
| BIOCARTA_GATA3_PATHWAY                                         | -1.3691845 | 0.232915   |
| YAO_TEMPORAL_RESPONSE_TO_PROGESTERONE_CLUSTER_6                | -1.3691729 | 0.2326697  |
| ABE_INNER_EAR                                                  | -1.3689784 | 0.2326942  |
| BRCHAT_RESPONSE_TO_METHOTREXATE_UP                             | -1.3688642 | 0.23259065 |
| KIM_WT1_TARGETS_8HR_UP                                         | -1.3684195 | 0.23298177 |
| RODRIGUES_THYROID_CARCINOMA_ANAPLASTIC_DN                      | -1.3682926 | 0.23290212 |
| QI_PLASMACYTOMA_DN                                             | -1.3674443 | 0.23397791 |
| SARTIPY_BLUNTED_BY_INSULIN_RESISTANCE_UP                       | -1.3665729 | 0.23500295 |
| REACTOME_INTEGRIN_ALPHAII_BETA3_SIGNALING                      | -1.3663933 | 0.23499411 |
| REACTOME_INWARDLY_RECTIFYING_K_CHANNELS                        | -1.365823  | 0.23556083 |
| NAKAMURA_METASTASIS_MODEL_UP                                   | -1.3656297 | 0.23557785 |
| BIOCARTA_IL3_PATHWAY                                           | -1.365614  | 0.23534106 |
| YORDY_RECIPROCAL_REGULATION_BY_ETS1_AND_SP100_DN               | -1.3651221 | 0.23577012 |
| MANTOVANI_VIRAL_GPCR_SIGNALING_UP                              | -1.3649989 | 0.23568307 |
| LEE_LIVER_CANCER_DENA_UP                                       | -1.3649639 | 0.23546715 |
| BIOCARTA_CTF_PATHWAY                                           | -1.3649604 | 0.23520905 |
| GENTILE_UV_RESPONSE_CLUSTER_D7                                 | -1.3645773 | 0.23557375 |
| KEGG_BASAL_CELL_CARCINOMA                                      | -1.3638179 | 0.23643558 |
| PARK_TRETINOIN_RESPONSE_AND_RARA_PLZF_FUSION                   | -1.3633716 | 0.23679715 |
| MCCLUNG_CREB1_TARGETS_DN                                       | -1.362732  | 0.23750088 |
| KIM_WT1_TARGETS_12HR_UP                                        | -1.3626114 | 0.23741713 |
| MAHADEVAN_GIST_MORPHOLOGICAL_SWITCH                            | -1.3624622 | 0.23738135 |
| ROSS_ACUTE_MYELOID_LEUKEMIA_CBF                                | -1.3622626 | 0.23742516 |
| BIOCARTA_INSULIN_PATHWAY                                       | -1.3620931 | 0.23742437 |
| ST_INTEGRIN_SIGNALING_PATHWAY                                  | -1.3620899 | 0.23716523 |
| LEE_AGING_CEREBELLUM_DN                                        | -1.3618692 | 0.2372249  |
| AMIT_SERUM_RESPONSE_60_MCF10A                                  | -1.36185   | 0.2369928  |
| WEIGEL_OXIDATIVE_STRESS_BY_HNE_AND_TBH                         | -1.361391  | 0.23742262 |
| BIOCARTA_SPPA_PATHWAY                                          | -1.3612214 | 0.2373914  |
| REACTOME_AQUAPORIN_MEDIATED_TRANSPORT                          | -1.361198  | 0.23716603 |
| GAUSSMANN_MLL_AF4_FUSION_TARGETS_A_UP                          | -1.360404  | 0.23809607 |
| ONKEN_UVEAL_MELANOMA_DN                                        | -1.3600646 | 0.23833834 |
| PID_REELIN_PATHWAY                                             | -1.3597558 | 0.2385241  |
| HESS_TARGETS_OF_HOXA9_AND_MEI1_DN                              | -1.3594282 | 0.23877703 |
| HOQUE_METHYLATED_IN_CANCER                                     | -1.359398  | 0.23856002 |
| BROWNE_HCMV_INFECTION_14HR_DN                                  | -1.3592408 | 0.23849808 |
| KAMIKUBO_MYELOID_CEBPA_NETWORK                                 | -1.3589468 | 0.23865317 |
| REACTOME_THROMBOXANE_SIGNALING_THROUGH_TP_RECEPTOR             | -1.3586698 | 0.23879027 |
| CHIANG_LIVER_CANCER_SUBCLASS_CTNNB1_DN                         | -1.3585922 | 0.23865534 |
| MULLIGHAN_MLL_SIGNATURE_2_DN                                   | -1.357467  | 0.23997279 |
| SARTIPY_BLUNTED_BY_INSULIN_RESISTANCE_DN                       | -1.3573335 | 0.23990631 |
| REACTOME_KERATAN_SULFATE_BIOSYNTHESIS                          | -1.3571812 | 0.23986864 |
| REACTOME_GLUCAGON_SIGNALING_IN_METABOLIC_REGULATION            | -1.3571527 | 0.23966654 |
| BACOLOD_RESISTANCE_TO_ALKYLATING_AGENTS_UP                     | -1.3567934 | 0.23996672 |
| HAHTOLA_MYCOSIS_FUNGOIDES_SKIN_UP                              | -1.3567033 | 0.23983115 |
| BOYLAN_MULTIPLE_MYELOMA_PCA3_DN                                | -1.3564949 | 0.23983693 |
| REACTOME_METABOLISM_OF_CARBOHYDRATES                           | -1.3562444 | 0.23996069 |

|                                                  |            |            |
|--------------------------------------------------|------------|------------|
| MILI_PSEUDOPODIA_CHEMOTAXIS_DN                   | -1.3544565 | 0.24237962 |
| CASORELLI_APL_SECONDARY_VS_DE_NOVO_UP            | -1.3540021 | 0.2428607  |
| BEIER_GLIOMA_STEM_CELL_DN                        | -1.353912  | 0.24271773 |
| CHESLER_BRAIN_HIGHEST_GENETIC_VARIANCE           | -1.3538148 | 0.2425962  |
| KEGG_OLFACTORY_TRANSDUCTION                      | -1.3536482 | 0.24258253 |
| CHYLA_CBFA2T3_TARGETS_UP                         | -1.353514  | 0.24253343 |
| HAN_SATB1_TARGETS_DN                             | -1.3534747 | 0.24232927 |
| REACTOME_ACYL_CHAIN_REMODELLING_OF_PE            | -1.3533539 | 0.24223271 |
| GALINDO_IMMUNE_RESPONSE_TO_ENTEROTOXIN           | -1.3524704 | 0.24325024 |
| BIOCARTA_PARI_PATHWAY                            | -1.3521739 | 0.24340834 |
| PLASARI_TGFB1_SIGNALING_VIA_NFIC_10HR_UP         | -1.3520753 | 0.24329615 |
| APPEL_IMATINIB_RESPONSE                          | -1.3512409 | 0.2442561  |
| MAHAJAN_RESPONSE_TO_IL1A_UP                      | -1.3505567 | 0.24501899 |
| ONDER_CDH1_TARGETS_1_UP                          | -1.3504063 | 0.24498917 |
| BROWNE_HCMV_INFECTION_20HR_DN                    | -1.3496858 | 0.24573381 |
| LEE_AGING_NEOCORTEX_DN                           | -1.349534  | 0.24569568 |
| SA_TRKA_RECEPTOR                                 | -1.3493639 | 0.24566306 |
| PIEPOLI_LGI1_TARGETS_UP                          | -1.3491185 | 0.24579231 |
| YAUCH_HEDGEHOG_SIGNALING_PARACRINE_UP            | -1.3487152 | 0.24612558 |
| GRAESSMANN_APOPTOSIS_BY_SERUM_DEPRIVATION_DN     | -1.3482667 | 0.246503   |
| REACTOME KERATAN SULFATE KERATIN METABOLISM      | -1.3481568 | 0.24641833 |
| PID_AVB3_OPN_PATHWAY                             | -1.3476205 | 0.24692026 |
| NOUSHMEHR_GBM_SILENCED_BY_METHYLATION            | -1.346992  | 0.24756421 |
| FOSTER_KDM1A_TARGETS_UP                          | -1.346807  | 0.24758576 |
| HASLINGER_B_CLL_WITH_MUTATED_VH_GENES            | -1.3467934 | 0.24734628 |
| ACEVEDO_NORMAL_TISSUE_ADJACENT_TO_LIVER_TUMOR_UP | -1.3464895 | 0.24753551 |
| DALESSIO_TSA_RESPONSE                            | -1.3462682 | 0.24759774 |
| MELLMAN_TUT1_TARGETS_DN                          | -1.3459736 | 0.24776892 |
| KEGG_BETA_ALANINE_METABOLISM                     | -1.3455297 | 0.24817929 |
| NABA_ECM_REGULATORS                              | -1.3451369 | 0.24854529 |
| ACEVEDO_LIVER_CANCER_WITH_H3K27ME3_UP            | -1.3451025 | 0.24833022 |
| TRAYNOR_RETT_SYNDROM_UP                          | -1.3450598 | 0.24815044 |
| KEGG_NICOTINATE_AND_NICOTINAMIDE_METABOLISM      | -1.3447763 | 0.24829163 |
| GOUYER_TATI_TARGETS_DN                           | -1.343895  | 0.24933411 |
| CRX_DN.V1_DN                                     | -1.7350211 | 0.06942698 |
| MTOR_UP.V1_DN                                    | -1.6825097 | 0.08201503 |
| TGFB_UP.V1_UP                                    | -1.6818198 | 0.05543168 |
| PKCA_DN.V1_UP                                    | -1.6660329 | 0.05254351 |
| AKT_UP.V1_DN                                     | -1.642436  | 0.0635     |
| CAHOY_ASTROGLIAL                                 | -1.6250536 | 0.06972968 |
| KRAS.AMP.LUNG_UP.V1_DN                           | -1.6074493 | 0.07493567 |
| E2F1_UP.V1_DN                                    | -1.6045095 | 0.06901259 |
| KRAS.600.LUNG.BREAST_UP.V1_UP                    | -1.5288396 | 0.15869235 |
| ATM_DN.V1_UP                                     | -1.5172858 | 0.16605628 |
| JNK_DN.V1_DN                                     | -1.5166101 | 0.15181544 |
| BCAT.100_UP.V1_UP                                | -1.5100213 | 0.15069985 |
| PTEN_DN.V2_UP                                    | -1.5078735 | 0.1426367  |
| IL2_UP.V1_DN                                     | -1.5006279 | 0.14213516 |
| AKT_UP_MTOR_DN.V1_DN                             | -1.4988804 | 0.1346569  |
| WNT_UP.V1_DN                                     | -1.4973423 | 0.12853783 |
| NOTCH_DN.V1_DN                                   | -1.49338   | 0.12554894 |
| IL15_UP.V1_DN                                    | -1.4900988 | 0.12315715 |
| ESC_J1_UP_LATE.V1_DN                             | -1.4755226 | 0.13486645 |
| CTIP_DN.V1_UP                                    | -1.4697733 | 0.1355276  |
| PKCA_DN.V1_DN                                    | -1.469457  | 0.12950712 |
| P53_DN.V1_DN                                     | -1.4658664 | 0.12836105 |
| LEF1_UP.V1_UP                                    | -1.4602654 | 0.1296367  |
| MEK_UP.V1_UP                                     | -1.4553083 | 0.13057612 |
| KRAS.KIDNEY_UP.V1_DN                             | -1.4545137 | 0.12608986 |
| CYCLIN_D1_UP.V1_UP                               | -1.4471699 | 0.12973988 |
| KRAS.300_UP.V1_UP                                | -1.4386575 | 0.13532494 |
| ATF2_UP.V1_DN                                    | -1.4371502 | 0.13245636 |
| IL21_UP.V1_DN                                    | -1.4347256 | 0.13087845 |
| CSR_LATE_UP.V1_DN                                | -1.4288423 | 0.13320816 |
| ATF2_S_UP.V1_DN                                  | -1.4260631 | 0.13213645 |
| PTEN_DN.V1_UP                                    | -1.4238199 | 0.13039511 |
| SNF5_DN.V1_DN                                    | -1.4179019 | 0.13382533 |
| KRAS.600_UP.V1_UP                                | -1.4125656 | 0.1364924  |
| NFE2L2.V2                                        | -1.4121625 | 0.1329603  |
| KRAS.LUNG.BREAST_UP.V1_UP                        | -1.40353   | 0.13943826 |
| JAK2_DN.V1_UP                                    | -1.3952366 | 0.14667855 |
| KRAS.BREAST_UP.V1_DN                             | -1.3950573 | 0.1430682  |
| ALK_DN.V1_UP                                     | -1.3911577 | 0.14417669 |
| KRAS.PROSTATE_UP.V1_UP                           | -1.3809389 | 0.15376666 |
| KRAS.BREAST_UP.V1_UP                             | -1.3780402 | 0.15297423 |
| ESC_J1_UP_EARLY.V1_DN                            | -1.377274  | 0.15040855 |
| KRAS.DF.V1_UP                                    | -1.3762187 | 0.14815712 |

|                                            |            |            |
|--------------------------------------------|------------|------------|
| KRAS.50_UP.V1_UP                           | -1.3750936 | 0.14628437 |
| P53_DN.V2_DN                               | -1.3700521 | 0.14971359 |
| ESC_V6.5_UP_EARLY.V1_DN                    | -1.3679935 | 0.14923322 |
| BMI1_DN.V1_UP                              | -1.3589884 | 0.15645759 |
| ESC_V6.5_UP_LATE.V1_UP                     | -1.3558766 | 0.15637203 |
| ESC_J1_UP_LATE.V1_UP                       | -1.353297  | 0.15666541 |
| RAF_UP.V1_UP                               | -1.3522632 | 0.1546138  |
| SRC_UP.V1_UP                               | -1.3515477 | 0.15240669 |
| VEGF_A_UP.V1_UP                            | -1.3497983 | 0.15188543 |
| BMI1_DN_MEL18_DN.V1_DN                     | -1.3483734 | 0.15063354 |
| NOTCH_DN.V1_UP                             | -1.335841  | 0.16195089 |
| BMI1_DN.V1_DN                              | -1.3338896 | 0.16145979 |
| IL21_UP.V1_UP                              | -1.3329918 | 0.15968436 |
| KRAS.KIDNEY_UP.V1_UP                       | -1.3276392 | 0.163363   |
| RELA_DN.V1_UP                              | -1.326157  | 0.1625269  |
| PIGF_UP.V1_DN                              | -1.3255825 | 0.16066264 |
| RAPA_EARLY_UP.V1_UP                        | -1.3166031 | 0.16971102 |
| WNT_UP.V1_UP                               | -1.3131326 | 0.1713998  |
| CYCLIN_D1_KE_V1_DN                         | -1.308175  | 0.17444482 |
| KRAS.LUNG_UP.V1_UP                         | -1.282725  | 0.20699593 |
| NRL_DN.V1_DN                               | -1.2819195 | 0.20481926 |
| GLI1_UP.V1_UP                              | -1.2813271 | 0.20250192 |
| CYCLIN_D1_KE_V1_UP                         | -1.2803239 | 0.20086113 |
| PRC2_EZH2_UP.V1_DN                         | -1.278751  | 0.19980413 |
| MEL18_DN.V1_UP                             | -1.2768205 | 0.19939587 |
| PRC2_EED_UP.V1_UP                          | -1.273807  | 0.20069681 |
| JNK_DN.V1_UP                               | -1.2732956 | 0.19852148 |
| PDGF_UP.V1_UP                              | -1.271692  | 0.19766079 |
| KRAS.AMP.LUNG_UP.V1_UP                     | -1.2704285 | 0.19639398 |
| CRX_NRL_DN.V1_DN                           | -1.2689673 | 0.19549988 |
| ATM_DN.V1_DN                               | -1.2661846 | 0.19658415 |
| CSR_EARLY_UP.V1_DN                         | -1.2658079 | 0.1942995  |
| IL15_UP.V1_UP                              | -1.2610772 | 0.19768488 |
| PRC1_BMI_UP.V1_DN                          | -1.2480775 | 0.21171434 |
| BMI1_DN_MEL18_DN.V1_UP                     | -1.2449237 | 0.21279511 |
| ESC_V6.5_UP_LATE.V1_DN                     | -1.2443691 | 0.21074864 |
| BRCA1_DN.V1_DN                             | -1.243352  | 0.20936434 |
| IL2_UP.V1_UP                               | -1.2427052 | 0.20756154 |
| CAHOY_ASTROCYTIC                           | -1.2375094 | 0.21190163 |
| LTE2_UP.V1_UP                              | -1.2369107 | 0.21004015 |
| AKT_UP_MTOR_DN.V1_UP                       | -1.2365422 | 0.20795628 |
| YAP1_UP                                    | -1.2333227 | 0.20922264 |
| KRAS.600.LUNG.BREAST_UP.V1_DN              | -1.2272022 | 0.21469782 |
| BRCA1_DN.V1_UP                             | -1.2219046 | 0.21836372 |
| GCPN_SHH_UP_LATE.V1_DN                     | -1.2173313 | 0.22171183 |
| TGFB_UP.V1_DN                              | -1.213078  | 0.2253584  |
| STK33_UP                                   | -1.2121315 | 0.22405198 |
| CYCLIN_D1_UP.V1_DN                         | -1.2059959 | 0.23064941 |
| KRAS.LUNG.BREAST_UP.V1_DN                  | -1.2059004 | 0.22822031 |
| EGFR_UP.V1_UP                              | -1.1976947 | 0.23612998 |
| TBK1_DF_UP                                 | -1.1927353 | 0.240033   |
| RB_DN.V1_DN                                | -1.1896583 | 0.24135733 |
| STK33_SKM_UP                               | -1.1813788 | 0.24782002 |
| PTEN_DN.V2_DN                              | -1.178629  | 0.24891411 |
| RELA_DN.V1_DN                              | -1.1785723 | 0.24645613 |
| CAMP_UP.V1_DN                              | -1.1773233 | 0.24546011 |
| ESC_J1_UP_EARLY.V1_UP                      | -1.1753533 | 0.2456882  |
| PIGF_UP.V1_UP                              | -1.1716478 | 0.24861006 |
| HALLMARK_ADIPOGENESIS                      | -1.8095831 | 0.01792035 |
| HALLMARK_XENOBIOTIC_METABOLISM             | -1.7684536 | 0.0185771  |
| HALLMARK_FATTY_ACID_METABOLISM             | -1.7180953 | 0.02246274 |
| HALLMARK_HYPOXIA                           | -1.6526405 | 0.03961282 |
| HALLMARK_MYOGENESIS                        | -1.6453276 | 0.03503998 |
| HALLMARK_UV_RESPONSE_DN                    | -1.5724976 | 0.07721684 |
| HALLMARK_REACTIVE_OXIGEN_SPECIES_PATHWAY   | -1.5664216 | 0.07013124 |
| HALLMARK_EPITHELIAL_MESENCHYMAL_TRANSITION | -1.5346494 | 0.08758862 |
| HALLMARK_ANGIOGENESIS                      | -1.5290772 | 0.08300371 |
| HALLMARK_COAGULATION                       | -1.5008595 | 0.10015855 |
| HALLMARK_KRAS_SIGNALING_UP                 | -1.4480565 | 0.1417481  |
| HALLMARK_APICAL_JUNCTION                   | -1.4407843 | 0.13995437 |
| HALLMARK_BILE_ACID_METABOLISM              | -1.4364169 | 0.13348778 |
| HALLMARK_PANCREAS_BETA_CELLS               | -1.3653072 | 0.20173047 |
| HALLMARK_TNFA_SIGNALING_VIA_NFKB           | -1.343455  | 0.21645644 |
| HALLMARK_UV_RESPONSE_UP                    | -1.3250334 | 0.2260359  |
| HALLMARK_APOPTOSIS                         | -1.3164364 | 0.22339101 |
| HALLMARK_P53_PATHWAY                       | -1.3106899 | 0.21902713 |
| HALLMARK_HEME_METABOLISM                   | -1.2986828 | 0.22079004 |

|                                  |            |            |
|----------------------------------|------------|------------|
| HALLMARK_TGF_BETA_SIGNALING      | -1.2741126 | 0.23411074 |
| HALLMARK_CHOLESTEROL_HOMEOSTASIS | -1.2662278 | 0.23204537 |
| HALLMARK_IL2_STAT5_SIGNALING     | -1.2423098 | 0.24907301 |
